# Supplementary material for: Comparing modeling methods of genomic prediction for growth traits of a tropical timber species, Shorea macrophylla
Source: Frontiers journal article supplement (doi:10.3389/fpls.2023.1241908), 2023-10-31
Supplement: Image_2.pdf [file Image_2.pdf]

0\_train

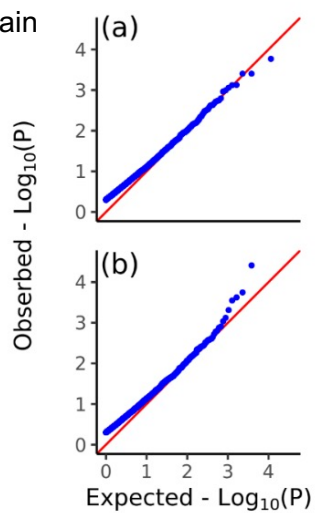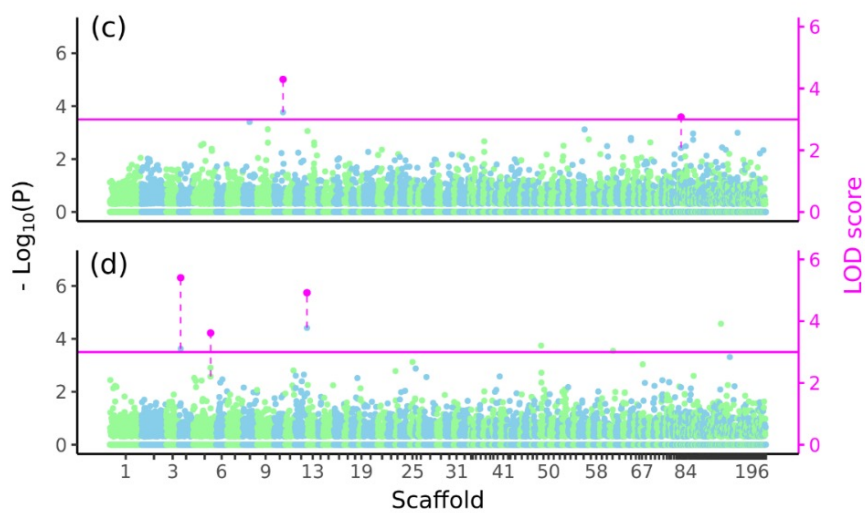

1\_train

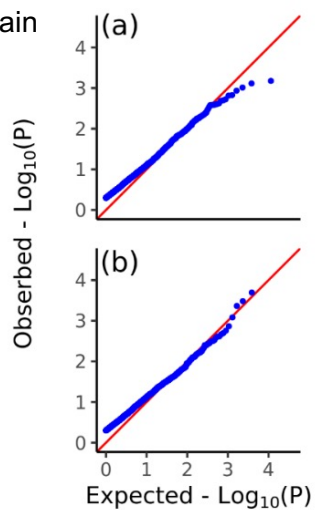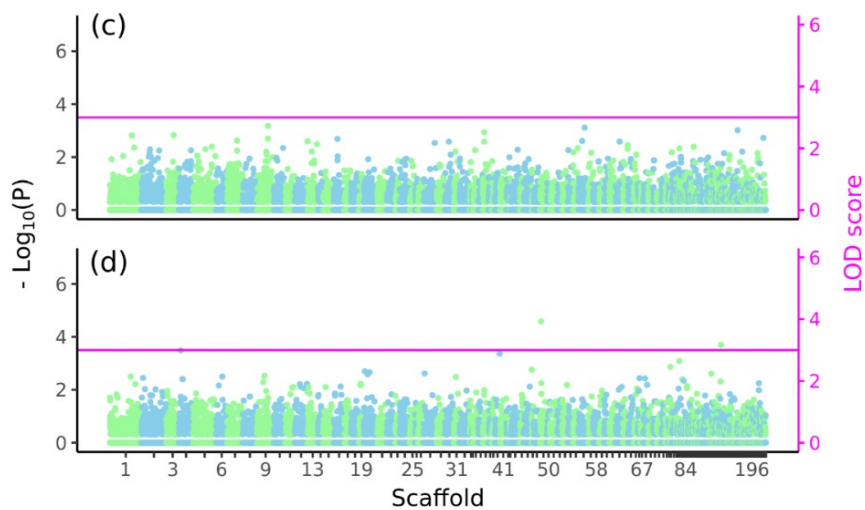

2\_train

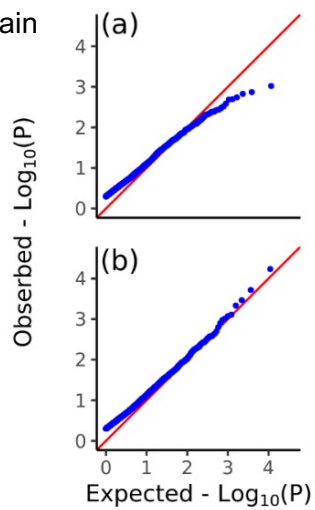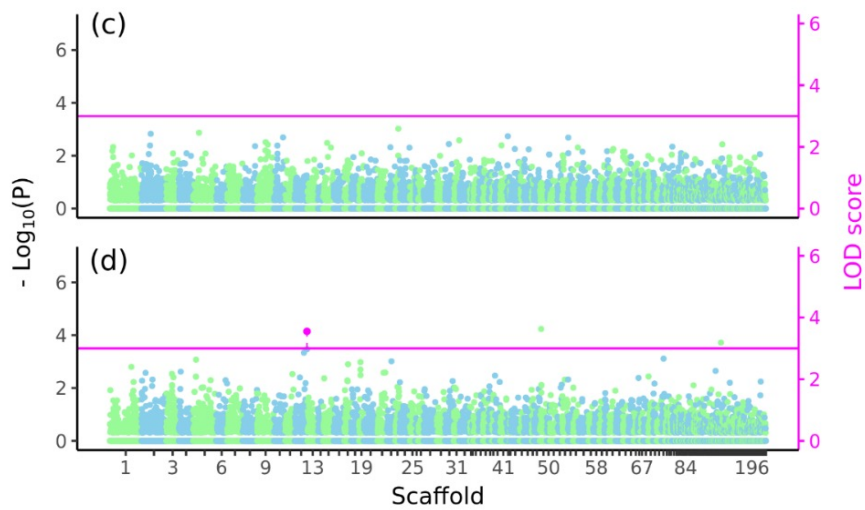

3\_train

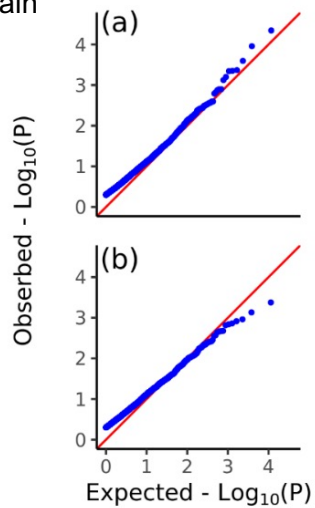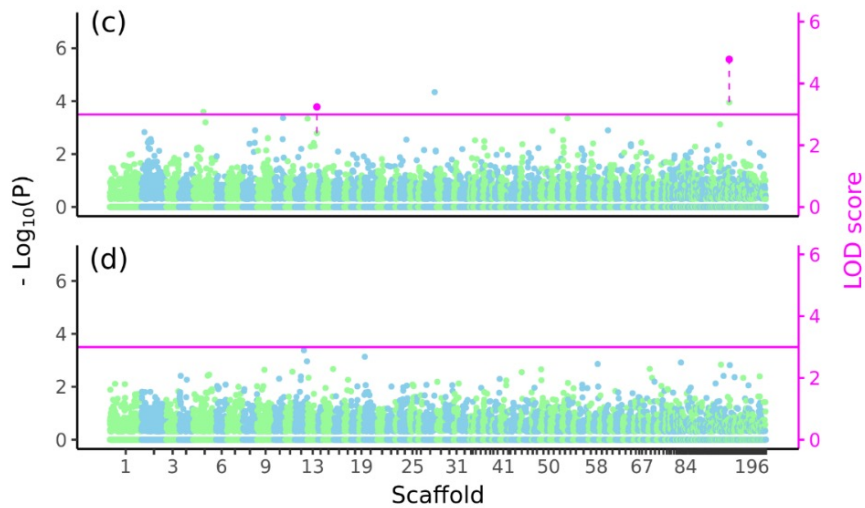

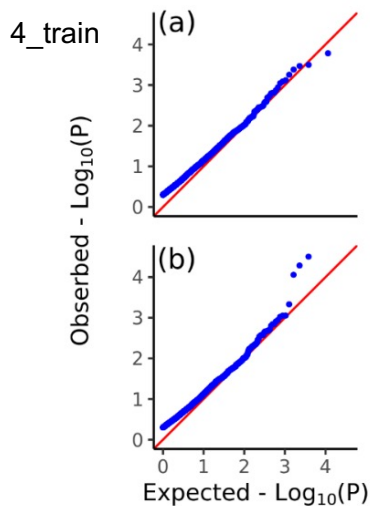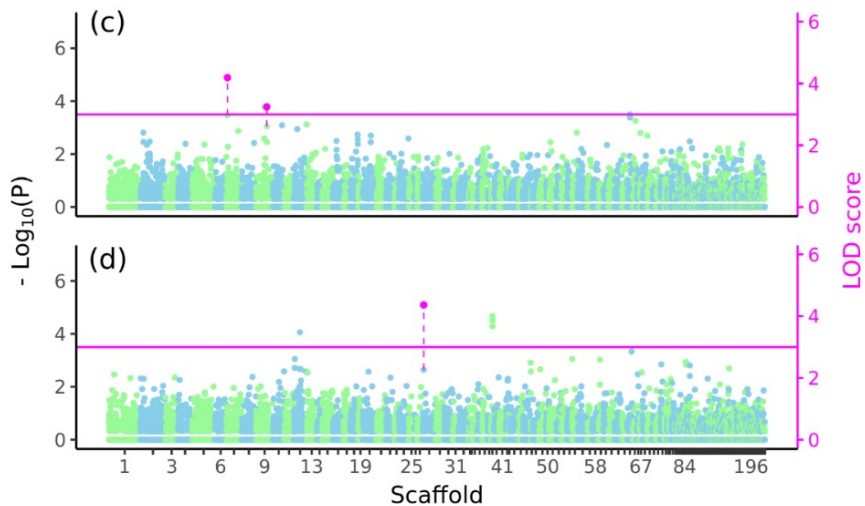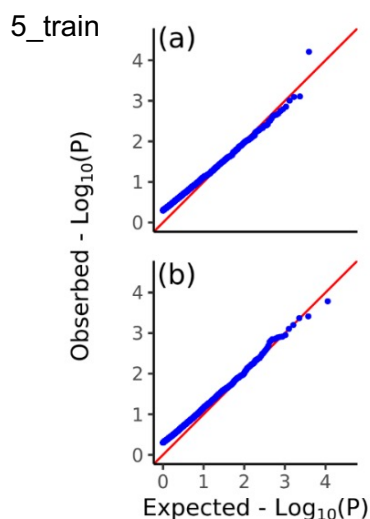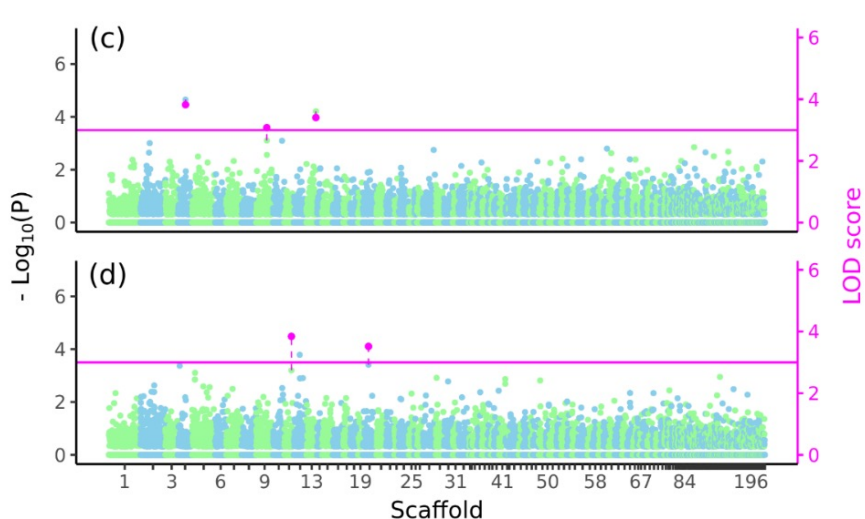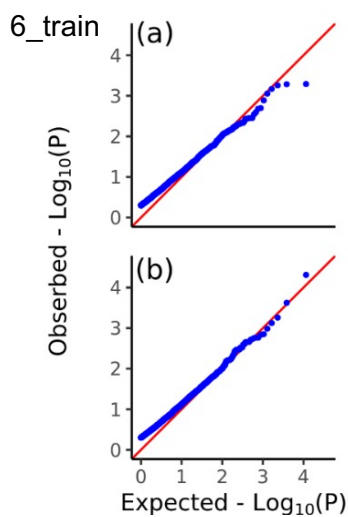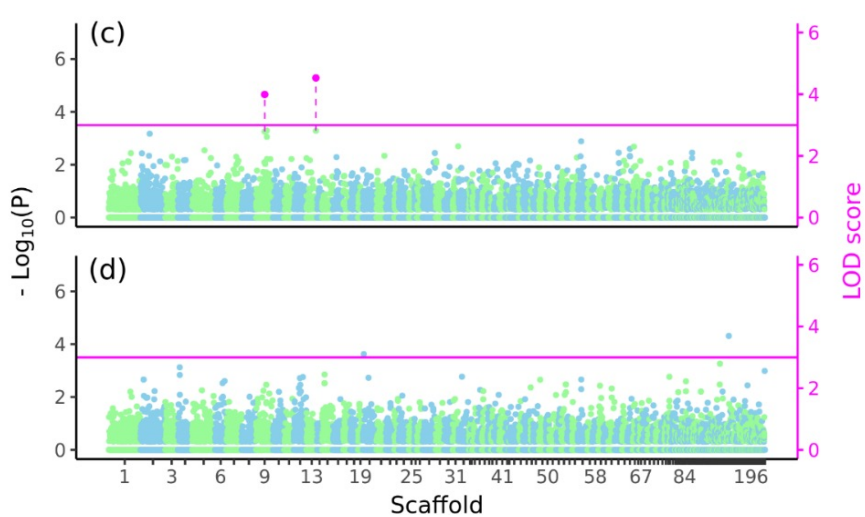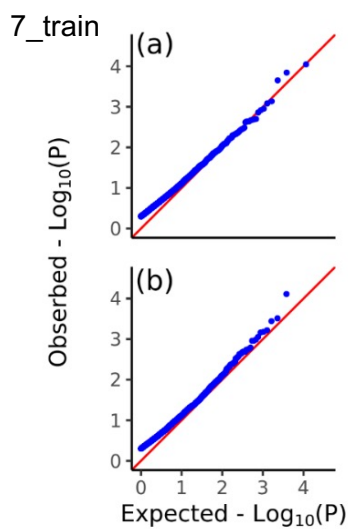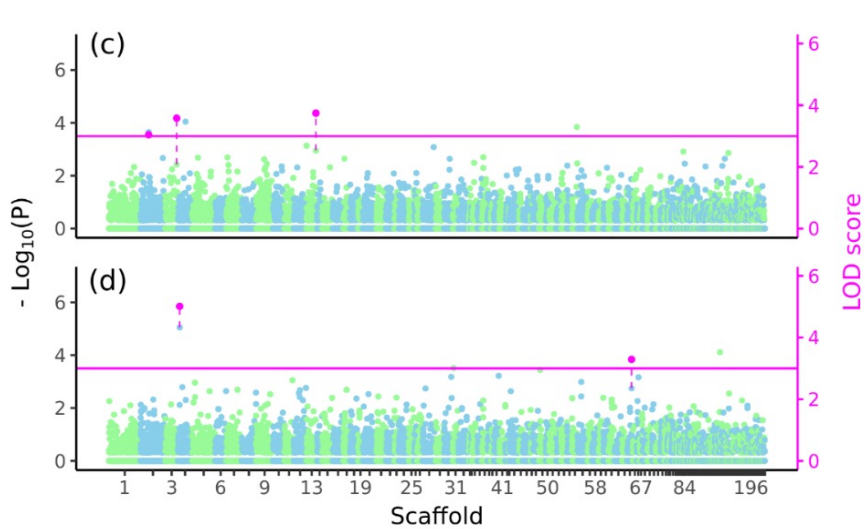

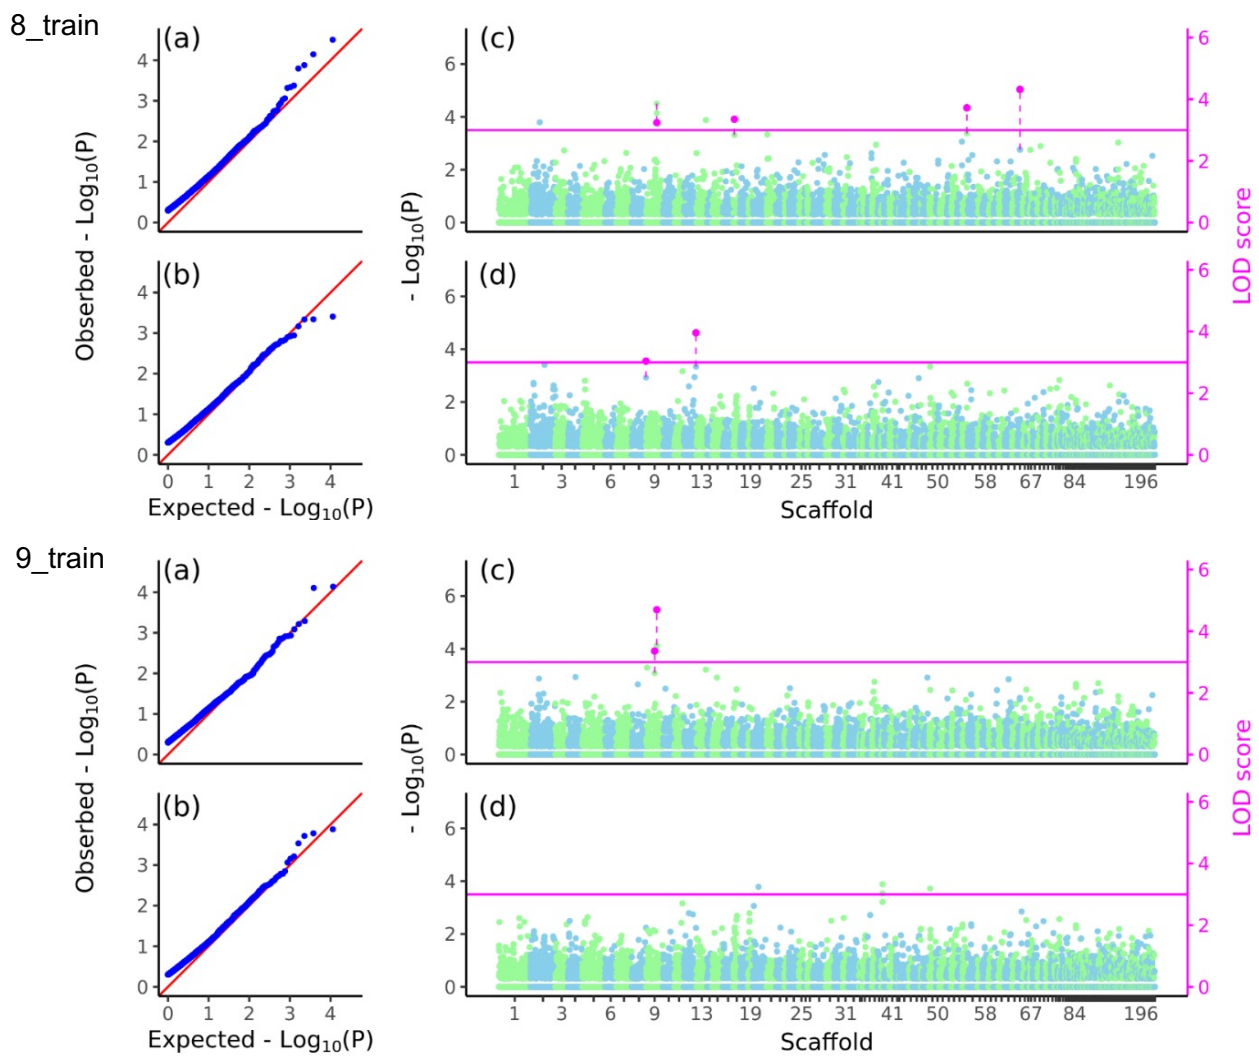

Figure S2. Q-Q and Manhattan plots of the second GWAS using SNPs, D7 and H7.

(a) and (b) represent Q-Q plots for D7 and H7, respectively and (c) and (d) represent Manhattan plots for D7 and H7, respectively.
