# Supplementary material for: Comparing modeling methods of genomic prediction for growth traits of a tropical timber species, Shorea macrophylla
Source: Front Plant Sci. 2023 Oct 31;14:1241908. doi: 10.3389/fpls.2023.1241908 (PMC10644202; doi:10.3389/fpls.2023.1241908)
Supplement: Supplementary file 6 [file Table_4.xlsx]

## Sheet: n_alleles
Table S4. Number of alleles of each training and test populations for 18037 SNPs
SNP ID	0_train	0_test	1_train	1_test	2_train	2_test	3_train	3_test	4_train	4_test	5_train	5_test	6_train	6_test	7_train	7_test	8_train	8_test	9_train	9_test	Min of number of alleles
SSCAFFOLD00001_20489	3	2	3	2	3	2	3	2	3	2	3	2	3	2	3	2	2	3	3	2	2
SSCAFFOLD00001_51756	3	2	3	2	3	2	3	2	3	2	3	2	3	2	2	3	3	2	3	2	2
SSCAFFOLD00001_51782	3	2	3	2	3	2	3	2	3	3	3	2	3	3	3	2	3	3	3	3	2
SSCAFFOLD00001_101683	3	3	3	3	3	3	3	3	3	3	3	3	3	3	3	3	3	3	3	3	3
SSCAFFOLD00001_101687	3	3	3	3	3	3	3	3	3	3	3	3	3	2	3	3	3	3	3	3	2
SSCAFFOLD00001_101688	3	3	3	3	3	3	3	3	3	3	3	3	3	3	3	3	3	3	3	3	3
SSCAFFOLD00001_107663	3	3	3	3	3	3	3	3	3	3	3	3	3	3	3	3	3	3	3	3	3
SSCAFFOLD00001_118964	3	2	3	2	3	2	2	3	3	2	3	2	3	2	3	2	2	3	3	2	2
SSCAFFOLD00001_119021	2	2	2	2	2	2	2	2	2	2	2	2	2	2	2	2	2	2	2	2	2
SSCAFFOLD00001_119035	3	3	3	3	3	3	3	3	3	3	3	3	3	3	3	3	3	3	3	3	3
SSCAFFOLD00001_119166	3	2	3	3	3	3	3	3	3	3	3	3	3	3	3	3	3	3	3	3	2
SSCAFFOLD00001_119167	3	3	3	3	3	2	3	2	3	2	3	2	3	3	3	2	3	2	3	2	2
SSCAFFOLD00001_119182	3	3	3	3	3	3	3	3	3	3	3	3	3	3	3	3	3	3	3	2	2
SSCAFFOLD00001_127023	3	3	3	3	3	3	3	3	3	3	3	3	3	3	3	3	3	3	3	3	3
SSCAFFOLD00001_148842	3	3	3	3	3	2	3	3	3	3	3	2	3	2	3	2	3	2	3	3	2
SSCAFFOLD00001_148890	3	3	3	3	3	2	3	3	3	3	3	2	3	2	3	2	3	2	3	3	2
SSCAFFOLD00001_148927	3	2	2	3	2	3	3	2	2	3	2	3	3	2	3	2	3	2	3	2	2
SSCAFFOLD00001_148986	3	3	3	3	3	3	3	3	3	3	3	3	3	2	3	2	3	2	3	3	2
SSCAFFOLD00001_148987	3	3	3	3	3	3	3	3	3	3	3	3	3	2	3	2	3	2	3	3	2
SSCAFFOLD00001_149027	3	3	3	3	3	3	3	3	3	3	3	3	3	2	3	2	3	2	3	3	2
SSCAFFOLD00001_149030	3	3	3	3	3	3	3	3	3	3	3	3	3	3	3	3	3	3	3	3	3
SSCAFFOLD00001_157028	3	3	3	3	3	3	3	3	3	2	3	2	3	3	3	3	3	3	3	3	2
SSCAFFOLD00001_157195	2	2	2	2	2	2	2	2	2	2	2	2	2	2	2	2	2	2	2	2	2
SSCAFFOLD00001_158490	3	3	3	3	3	3	3	3	3	2	3	2	3	3	3	3	3	3	3	3	2
SSCAFFOLD00001_158505	2	3	3	2	3	2	3	2	3	2	3	2	2	3	3	2	3	2	2	3	2
SSCAFFOLD00001_162557	3	3	3	3	3	3	3	3	3	2	3	2	3	3	3	3	3	3	3	3	2
SSCAFFOLD00001_162618	3	3	3	3	3	3	3	3	3	2	3	2	3	3	3	3	3	3	3	3	2
SSCAFFOLD00001_162631	2	2	2	2	2	2	2	2	2	2	2	2	2	2	2	2	2	2	2	2	2
SSCAFFOLD00001_202723	3	2	3	2	3	2	2	3	2	3	3	2	3	2	2	3	2	3	3	2	2
SSCAFFOLD00001_202748	3	2	3	2	3	2	2	3	2	3	3	2	3	2	2	3	2	3	3	2	2
SSCAFFOLD00001_209045	3	3	3	3	3	3	3	3	3	3	3	3	3	3	3	3	3	3	3	3	3
SSCAFFOLD00001_212400	3	3	3	3	3	3	3	3	3	3	3	3	3	3	3	3	3	3	3	3	3
SSCAFFOLD00001_233627	3	2	3	3	3	3	3	3	3	3	3	3	3	2	3	3	3	3	3	3	2
SSCAFFOLD00001_233795	3	3	3	3	3	3	3	3	3	3	3	3	3	3	3	3	3	3	3	2	2
SSCAFFOLD00001_241071	3	2	2	3	3	2	3	2	3	2	2	3	3	2	3	2	3	2	2	3	2
SSCAFFOLD00001_241073	3	3	3	3	3	3	3	3	3	3	3	3	3	3	3	3	3	3	3	2	2
SSCAFFOLD00001_241856	2	3	3	2	3	2	3	2	3	2	3	2	2	3	3	2	3	2	2	3	2
SSCAFFOLD00001_241874	3	3	3	2	3	2	3	2	3	2	3	2	3	3	2	3	3	3	3	2	2
SSCAFFOLD00001_241885	3	3	3	3	3	3	3	3	3	3	3	3	3	3	3	3	3	3	3	3	3
SSCAFFOLD00001_241958	3	3	3	3	3	3	3	3	3	3	3	3	3	3	3	3	3	3	3	3	3
SSCAFFOLD00001_242150	2	3	3	2	3	2	3	2	3	2	3	2	2	3	3	2	3	2	2	3	2
SSCAFFOLD00001_243521	2	3	3	2	3	2	3	2	3	2	2	3	3	2	3	2	3	2	3	2	2
SSCAFFOLD00001_243682	3	3	3	3	3	3	3	3	3	3	3	3	3	3	3	3	3	3	3	3	3
SSCAFFOLD00001_297689	3	3	3	3	3	3	3	3	3	3	3	3	3	3	3	3	3	3	3	3	3
SSCAFFOLD00001_300576	2	3	3	2	3	2	3	2	3	2	3	2	2	3	3	2	3	2	2	3	2
SSCAFFOLD00001_305571	3	2	3	2	3	2	3	2	3	2	3	2	3	2	3	2	3	2	3	2	2
SSCAFFOLD00001_305607	3	3	3	3	3	3	3	3	3	3	3	2	3	3	3	3	3	3	3	3	2
SSCAFFOLD00001_305709	3	2	3	2	3	2	3	2	3	3	3	3	3	3	3	2	3	2	3	2	2
SSCAFFOLD00001_305745	2	2	2	2	2	2	2	2	2	2	2	2	2	2	2	2	2	2	2	2	2
SSCAFFOLD00001_305820	3	2	3	2	3	3	3	2	3	3	3	3	3	3	3	2	3	3	3	3	2
SSCAFFOLD00001_323574	2	3	3	2	3	2	3	2	3	2	3	2	2	3	3	2	3	2	2	3	2
SSCAFFOLD00001_330459	2	2	2	2	2	2	2	2	2	2	2	2	2	2	2	2	2	2	2	2	2
SSCAFFOLD00001_330529	3	3	3	3	3	3	3	3	3	3	3	3	3	3	3	2	3	2	3	3	2
SSCAFFOLD00001_338515	3	2	3	2	3	2	3	2	3	2	2	3	3	2	2	3	3	2	3	2	2
SSCAFFOLD00001_338522	3	3	3	3	3	3	3	3	3	3	3	3	3	3	3	3	3	3	3	3	3
SSCAFFOLD00001_338587	3	3	3	3	3	3	3	3	3	3	3	3	3	2	3	3	3	3	3	2	2
SSCAFFOLD00001_338703	3	3	3	3	3	3	3	3	3	3	3	2	3	2	3	2	3	3	3	2	2
SSCAFFOLD00001_338775	3	3	3	3	3	3	3	3	3	2	3	3	3	3	3	2	3	3	3	3	2
SSCAFFOLD00001_343553	3	3	3	3	3	3	3	2	3	2	3	3	3	2	3	3	3	3	3	3	2
SSCAFFOLD00001_361039	3	3	3	3	3	3	3	3	3	3	3	3	3	3	3	3	3	3	3	3	3
SSCAFFOLD00001_361075	3	3	3	2	3	3	3	2	3	2	3	2	3	3	3	2	3	2	2	3	2
SSCAFFOLD00001_361084	3	2	3	3	3	3	3	2	3	2	3	3	3	3	3	2	3	2	3	3	2
SSCAFFOLD00001_361283	3	3	3	3	3	3	3	3	3	3	3	3	3	3	3	3	3	3	3	3	3
SSCAFFOLD00001_361356	3	3	3	3	3	3	3	3	3	3	3	3	3	3	3	3	3	3	3	3	3
SSCAFFOLD00001_364243	3	2	3	2	2	3	3	2	3	2	3	2	2	3	3	2	2	3	2	3	2
SSCAFFOLD00001_364266	3	3	3	3	3	3	3	2	3	2	3	2	3	2	2	3	3	3	3	2	2
SSCAFFOLD00001_385609	3	3	3	3	3	2	3	3	3	3	3	3	3	3	3	3	3	3	3	3	2
SSCAFFOLD00001_403888	3	3	3	3	3	3	3	3	3	3	3	3	3	3	3	3	3	3	3	3	3
SSCAFFOLD00001_403903	3	2	3	2	3	2	3	2	3	3	3	2	3	3	3	2	3	3	3	2	2
SSCAFFOLD00001_433355	2	2	2	2	2	2	2	2	2	2	2	2	2	2	2	2	2	2	2	2	2
SSCAFFOLD00001_438973	3	3	3	3	3	3	3	3	3	3	3	2	2	3	3	2	2	3	3	3	2
SSCAFFOLD00001_443910	3	3	3	3	3	3	3	3	3	3	3	3	3	3	3	2	3	3	3	3	2
SSCAFFOLD00001_447230	3	3	3	3	3	3	3	3	3	3	3	3	3	3	3	3	3	3	3	3	3
SSCAFFOLD00001_447307	3	3	3	3	3	3	3	3	3	3	3	3	3	3	3	3	3	3	3	3	3
SSCAFFOLD00001_447324	3	3	3	3	3	3	3	3	3	3	3	3	3	3	3	3	3	3	3	3	3
SSCAFFOLD00001_469869	3	3	3	3	3	3	3	3	3	3	3	3	3	3	3	3	3	3	3	3	3
SSCAFFOLD00001_476776	3	3	3	3	3	3	3	3	3	3	3	3	3	3	3	3	3	3	3	3	3
SSCAFFOLD00001_514399	3	3	3	3	3	3	3	2	3	2	3	2	3	2	2	3	3	3	3	2	2
SSCAFFOLD00001_528123	3	3	3	3	3	3	3	3	3	3	3	3	3	3	3	3	3	3	3	3	3
SSCAFFOLD00001_612979	2	3	3	2	3	2	3	2	3	2	3	3	3	3	3	2	3	2	3	3	2
SSCAFFOLD00001_612986	3	3	3	3	3	3	3	3	3	3	3	3	3	3	3	3	3	3	3	3	3
SSCAFFOLD00001_637091	3	2	3	2	3	2	3	2	3	2	2	3	3	2	3	2	2	3	3	2	2
SSCAFFOLD00001_711490	3	3	3	3	3	2	3	3	3	3	3	3	3	2	3	2	3	3	3	2	2
SSCAFFOLD00001_713292	3	3	3	3	3	3	3	3	3	3	3	3	3	3	3	3	3	3	3	3	3
SSCAFFOLD00001_713295	3	3	3	3	3	3	3	3	3	3	3	3	3	3	3	3	3	3	3	3	3
SSCAFFOLD00001_713307	3	3	3	3	3	2	3	3	3	3	3	3	3	3	3	2	3	3	3	3	2
SSCAFFOLD00001_713321	3	3	3	3	3	3	3	3	3	3	3	3	3	3	3	3	3	3	3	3	3
SSCAFFOLD00001_718404	3	3	3	3	3	3	3	3	3	3	3	3	3	3	3	3	3	3	3	3	3
SSCAFFOLD00001_718405	3	3	3	3	3	3	3	3	3	3	3	3	3	3	3	3	3	3	3	3	3
SSCAFFOLD00001_718665	3	3	3	3	3	3	3	3	3	3	3	3	3	3	3	3	3	3	3	3	3
SSCAFFOLD00001_748493	3	3	3	3	3	2	3	2	3	3	3	2	3	2	3	2	3	3	3	2	2
SSCAFFOLD00001_748513	3	2	3	2	2	3	2	3	3	2	3	2	3	2	2	3	3	2	3	2	2
SSCAFFOLD00001_748527	3	2	3	2	3	2	3	2	3	3	3	3	3	2	3	2	3	2	3	3	2
SSCAFFOLD00001_748530	3	3	3	3	3	3	3	2	3	3	3	3	3	3	3	3	3	3	3	3	2
SSCAFFOLD00001_772981	2	3	3	2	3	2	3	2	3	2	3	2	2	3	3	2	3	2	2	3	2
SSCAFFOLD00001_775262	3	3	3	3	3	3	3	3	3	3	3	3	3	3	3	3	3	3	3	3	3
SSCAFFOLD00001_775278	3	3	3	3	3	3	3	3	3	3	3	3	3	3	3	3	3	3	3	3	3
SSCAFFOLD00001_794352	3	3	3	3	3	3	3	3	3	3	3	3	3	3	3	3	3	3	3	3	3
SSCAFFOLD00001_794463	3	3	3	3	3	3	3	3	3	3	3	3	3	3	3	3	3	3	3	3	3
SSCAFFOLD00001_794469	3	3	3	3	3	3	3	3	3	3	3	3	3	3	3	2	3	3	3	3	2
SSCAFFOLD00001_821780	3	2	3	2	2	3	3	2	3	2	3	2	3	2	3	2	3	3	3	3	2
SSCAFFOLD00001_832778	3	3	3	3	3	3	3	3	3	3	3	2	3	2	3	2	3	2	3	3	2
SSCAFFOLD00001_849504	3	2	2	3	2	3	3	2	3	2	2	3	3	2	3	2	3	2	3	2	2
SSCAFFOLD00001_849550	3	2	2	3	2	3	3	2	3	2	2	3	3	2	3	2	3	2	3	2	2
SSCAFFOLD00001_852981	3	3	3	3	3	2	3	2	3	3	3	3	3	3	3	3	3	3	3	3	2
SSCAFFOLD00001_857669	2	2	2	2	2	2	2	2	2	2	2	2	2	2	2	2	2	2	2	2	2
SSCAFFOLD00001_920395	3	3	3	3	3	3	3	2	3	3	3	2	3	3	3	3	3	3	3	2	2
SSCAFFOLD00001_968648	3	2	3	3	3	2	3	2	3	3	3	2	3	2	3	2	3	3	3	2	2
SSCAFFOLD00001_968772	3	2	2	3	2	3	3	2	3	2	3	2	3	2	3	2	3	2	3	2	2
SSCAFFOLD00001_1021736	2	2	2	2	2	2	2	2	2	2	2	2	2	2	2	2	2	2	2	2	2
SSCAFFOLD00001_1021739	2	2	2	2	2	2	2	2	2	2	2	2	2	2	2	2	2	2	2	2	2
SSCAFFOLD00001_1021745	3	2	3	2	3	2	3	2	3	2	2	3	3	2	3	2	2	3	3	2	2
SSCAFFOLD00001_1202056	3	3	3	3	3	3	3	2	3	2	3	2	3	3	3	3	3	2	3	3	2
SSCAFFOLD00001_1202308	3	2	3	3	3	3	3	2	3	3	3	2	3	2	3	3	3	2	3	2	2
SSCAFFOLD00001_1255333	3	2	3	3	3	3	3	3	3	2	3	2	3	2	3	2	3	2	3	3	2
SSCAFFOLD00001_1255336	3	3	3	3	3	3	3	3	3	3	3	3	3	3	3	3	3	3	3	3	3
SSCAFFOLD00001_1255345	3	3	3	3	3	2	3	3	2	3	3	3	3	3	3	3	3	3	2	3	2
SSCAFFOLD00001_1271294	3	2	3	3	3	3	3	2	3	3	3	3	3	3	3	2	3	3	3	2	2
SSCAFFOLD00001_1271494	3	3	3	2	3	2	3	2	3	2	3	2	3	3	3	2	3	2	3	3	2
SSCAFFOLD00001_1294785	3	2	2	3	2	3	3	2	2	3	2	3	3	2	3	2	3	2	3	2	2
SSCAFFOLD00001_1295029	3	2	2	3	2	3	3	2	2	3	2	3	3	2	3	2	3	2	3	2	2
SSCAFFOLD00001_1295103	3	2	2	3	2	3	3	2	2	3	2	3	3	2	3	2	3	2	3	2	2
SSCAFFOLD00001_1297067	3	3	3	3	3	3	3	3	3	3	3	3	3	3	3	3	3	3	3	3	3
SSCAFFOLD00001_1310276	3	2	3	3	2	3	3	2	3	3	3	3	3	2	3	2	3	2	3	2	2
SSCAFFOLD00001_1310287	3	3	3	3	3	3	3	3	3	3	3	3	3	3	3	3	3	3	3	3	3
SSCAFFOLD00001_1320146	3	3	3	2	3	2	3	2	3	2	3	2	3	3	3	2	3	2	3	3	2
SSCAFFOLD00001_1342458	3	2	3	3	3	2	3	2	3	3	3	2	3	2	3	2	3	3	3	2	2
SSCAFFOLD00001_1342722	3	2	3	2	3	2	3	2	3	2	2	3	3	2	3	2	3	2	3	2	2
SSCAFFOLD00001_1349866	3	3	3	3	3	3	3	3	3	3	3	3	3	2	3	3	3	3	3	3	2
SSCAFFOLD00001_1352548	3	3	3	3	3	2	3	3	3	3	3	3	3	3	3	3	3	2	3	3	2
SSCAFFOLD00001_1354003	3	2	3	2	3	2	3	2	3	2	3	2	3	2	3	2	2	3	3	2	2
SSCAFFOLD00001_1375534	3	3	3	3	3	3	3	3	3	3	3	3	3	3	3	3	3	3	3	3	3
SSCAFFOLD00001_1384423	3	3	3	3	3	3	3	3	3	3	3	3	3	3	3	3	3	3	3	3	3
SSCAFFOLD00001_1384493	3	3	3	3	3	3	3	3	3	3	3	3	3	3	3	3	3	3	3	3	3
SSCAFFOLD00001_1391240	3	3	3	3	3	3	3	3	3	3	3	3	3	3	3	3	3	3	3	3	3
SSCAFFOLD00001_1392894	3	3	3	3	3	2	3	3	3	3	3	3	3	2	3	3	3	3	3	2	2
SSCAFFOLD00001_1401081	3	2	3	2	3	2	3	2	3	3	3	2	3	2	3	2	3	3	3	3	2
SSCAFFOLD00001_1401192	2	2	2	2	2	2	2	2	2	2	2	2	2	2	2	2	2	2	2	2	2
SSCAFFOLD00001_1401228	3	3	3	3	3	3	3	3	3	3	3	3	3	3	3	3	3	3	3	3	3
SSCAFFOLD00001_1401255	3	3	3	3	3	2	3	3	3	2	3	2	3	3	3	3	3	2	3	3	2
SSCAFFOLD00001_1401264	3	3	3	3	3	3	3	3	3	3	3	3	3	3	3	3	3	3	3	3	3
SSCAFFOLD00001_1422635	3	3	3	3	3	3	3	3	3	3	3	3	3	3	3	3	3	3	3	3	3
SSCAFFOLD00001_1453272	3	3	3	3	3	3	3	3	3	3	3	3	3	3	3	3	3	3	3	3	3
SSCAFFOLD00001_1457422	3	2	3	3	3	3	3	2	3	2	3	3	3	3	3	3	3	2	3	2	2
SSCAFFOLD00001_1459044	3	3	3	3	3	3	3	3	3	3	3	3	3	3	3	3	3	3	3	3	3
SSCAFFOLD00001_1459087	3	2	2	3	3	2	3	2	3	2	3	2	2	3	2	3	3	2	3	2	2
SSCAFFOLD00001_1459188	2	3	3	2	3	2	2	3	3	2	2	3	2	3	2	3	3	2	3	2	2
SSCAFFOLD00001_1459219	2	3	3	2	3	2	2	3	3	2	2	3	2	3	2	3	3	2	3	2	2
SSCAFFOLD00001_1459252	2	3	3	2	3	2	2	3	3	2	2	3	2	3	2	3	3	2	3	2	2
SSCAFFOLD00001_1459316	3	3	3	2	3	2	3	3	3	3	3	3	3	3	3	3	3	2	3	2	2
SSCAFFOLD00001_1459459	2	3	3	2	3	2	2	3	3	2	2	3	2	3	2	3	3	2	3	2	2
SSCAFFOLD00001_1459519	2	3	3	2	3	2	2	3	3	2	2	3	2	3	2	3	3	2	3	2	2
SSCAFFOLD00001_1459533	2	3	3	2	3	2	2	3	3	2	2	3	2	3	2	3	3	2	3	2	2
SSCAFFOLD00001_1478097	3	3	3	3	3	2	3	3	3	2	3	3	3	3	3	3	3	3	3	2	2
SSCAFFOLD00001_1478129	3	3	3	3	3	3	3	3	3	3	3	3	3	3	3	3	3	3	3	3	3
SSCAFFOLD00001_1504616	3	3	3	3	3	3	3	3	3	3	3	3	3	3	3	3	3	3	3	3	3
SSCAFFOLD00001_1505003	3	2	2	3	3	2	3	2	2	3	3	2	3	2	3	2	3	2	2	3	2
SSCAFFOLD00001_1505073	3	3	3	2	3	3	3	3	3	3	3	3	3	3	3	3	3	3	3	3	2
SSCAFFOLD00001_1505231	3	2	3	2	2	3	3	2	3	2	3	2	3	2	3	2	3	2	3	2	2
SSCAFFOLD00001_1505313	2	3	3	2	3	2	3	2	2	3	3	2	3	2	3	2	3	2	2	3	2
SSCAFFOLD00001_1505388	3	3	3	3	3	3	3	3	3	3	3	3	3	3	3	3	3	3	3	3	3
SSCAFFOLD00001_1505393	3	3	3	3	3	3	3	3	3	3	3	3	3	3	3	3	3	3	3	3	3
SSCAFFOLD00001_1525959	3	3	3	3	3	3	3	3	3	3	3	3	3	3	3	3	3	3	3	3	3
SSCAFFOLD00001_1529182	2	3	3	2	3	2	3	2	2	3	3	2	3	2	3	2	3	2	2	3	2
SSCAFFOLD00001_1546572	3	3	3	3	3	3	3	3	3	3	3	3	3	3	3	3	3	3	3	3	3
SSCAFFOLD00001_1569895	2	2	2	2	2	2	2	2	2	2	2	2	2	2	2	2	2	2	2	2	2
SSCAFFOLD00001_1696180	3	3	3	3	3	3	3	3	3	3	3	3	3	3	3	3	3	3	3	3	3
SSCAFFOLD00001_1706984	3	3	3	2	3	2	3	2	3	3	3	3	3	3	3	2	3	2	3	3	2
SSCAFFOLD00001_1707146	2	2	2	2	2	2	2	2	2	2	2	2	2	2	2	2	2	2	2	2	2
SSCAFFOLD00001_1709940	3	2	3	2	3	3	3	3	3	2	3	3	3	2	3	3	3	3	3	3	2
SSCAFFOLD00001_1710019	3	3	3	3	3	3	3	2	3	2	3	3	3	2	3	3	3	3	3	3	2
SSCAFFOLD00001_1710056	3	2	3	2	3	2	2	3	3	2	3	2	3	2	3	2	2	3	3	2	2
SSCAFFOLD00001_1710147	3	3	3	2	3	2	3	2	3	2	3	2	3	3	3	2	3	2	3	3	2
SSCAFFOLD00001_1712527	3	3	3	2	3	2	3	2	3	2	3	3	3	2	3	2	3	3	3	2	2
SSCAFFOLD00001_1713051	3	3	3	3	3	3	3	3	3	3	3	3	3	3	3	3	3	3	3	3	3
SSCAFFOLD00001_1713063	3	3	3	3	3	3	3	3	3	3	3	3	3	3	3	3	3	3	3	3	3
SSCAFFOLD00001_1713073	3	3	3	3	3	3	3	3	3	3	3	3	3	3	3	3	3	3	3	3	3
SSCAFFOLD00001_1746138	2	2	2	2	2	2	2	2	2	2	2	2	2	2	2	2	2	2	2	2	2
SSCAFFOLD00001_1759668	3	3	3	3	3	3	3	3	3	3	3	3	3	3	3	3	3	3	3	3	3
SSCAFFOLD00001_1759881	3	3	3	3	3	3	3	2	3	3	3	3	3	2	3	2	3	3	3	3	2
SSCAFFOLD00001_1763112	3	3	3	3	3	3	3	3	3	3	3	3	3	3	3	2	3	3	3	3	2
SSCAFFOLD00001_1763117	3	3	3	3	3	3	3	3	3	3	3	3	3	3	3	3	3	3	3	3	3
SSCAFFOLD00001_1763127	3	3	3	3	3	3	3	3	3	3	3	3	3	3	3	3	3	3	3	3	3
SSCAFFOLD00001_1763162	3	2	3	3	3	2	3	3	3	3	3	2	3	3	3	3	3	3	3	3	2
SSCAFFOLD00001_1767303	3	3	3	3	3	3	3	3	3	3	3	3	3	3	3	3	3	2	3	3	2
SSCAFFOLD00001_1767410	3	2	3	3	3	2	3	2	3	2	3	2	3	2	3	2	3	3	3	2	2
SSCAFFOLD00001_1769732	3	3	3	2	3	2	3	3	3	3	3	3	3	3	3	2	3	2	3	3	2
SSCAFFOLD00001_1776841	3	3	3	3	3	3	3	3	3	3	3	3	3	3	3	3	3	3	3	3	3
SSCAFFOLD00001_1776890	3	2	3	2	3	2	3	2	3	3	3	2	3	2	3	2	3	2	3	3	2
SSCAFFOLD00001_1853749	3	3	3	3	3	3	3	3	3	3	3	3	3	3	3	3	3	3	3	3	3
SSCAFFOLD00001_1858452	3	3	3	3	3	3	3	3	3	3	3	3	3	3	3	3	3	3	3	3	3
SSCAFFOLD00001_1887060	3	3	3	3	3	3	3	3	3	3	3	3	3	3	3	3	3	3	3	3	3
SSCAFFOLD00001_1887104	3	3	3	3	3	3	3	3	3	3	3	3	3	3	3	3	3	3	3	3	3
SSCAFFOLD00001_2130680	3	3	3	2	3	3	3	3	3	2	3	3	3	3	3	2	3	2	3	3	2
SSCAFFOLD00001_2130872	3	3	3	3	3	2	3	2	3	3	3	2	3	3	3	2	3	2	3	3	2
SSCAFFOLD00001_2130888	3	3	3	3	3	3	3	3	3	3	3	3	3	3	3	3	3	3	3	3	3
SSCAFFOLD00001_2130939	3	3	3	3	3	3	3	3	3	3	3	3	3	3	3	3	3	3	3	3	3
SSCAFFOLD00001_2193650	2	2	2	2	2	2	2	2	2	2	2	2	2	2	2	2	2	2	2	2	2
SSCAFFOLD00001_2211711	3	3	3	2	3	3	3	3	3	3	3	3	3	3	3	2	3	2	3	3	2
SSCAFFOLD00001_2214761	3	3	3	2	3	3	3	3	3	3	3	3	3	3	3	3	3	3	3	3	2
SSCAFFOLD00001_2233596	3	2	3	3	3	3	3	3	3	2	3	2	3	3	3	2	3	3	3	3	2
SSCAFFOLD00001_2233615	3	2	2	3	3	2	3	2	3	2	3	2	3	2	3	2	3	2	3	2	2
SSCAFFOLD00001_2233639	3	2	2	3	3	2	3	2	3	2	3	2	3	2	3	2	3	2	3	2	2
SSCAFFOLD00001_2237000	3	3	3	3	3	3	3	3	3	3	3	3	3	3	3	3	3	3	3	3	3
SSCAFFOLD00001_2237901	3	3	3	2	3	2	3	2	3	3	3	3	3	3	3	2	3	2	3	3	2
SSCAFFOLD00001_2237992	3	3	3	3	3	3	3	3	3	3	3	3	3	3	3	3	3	3	3	3	3
SSCAFFOLD00001_2238358	3	3	3	3	3	3	3	3	3	3	3	3	3	3	3	3	3	3	3	3	3
SSCAFFOLD00001_2260595	3	3	3	3	3	3	3	3	3	3	3	3	3	3	3	3	3	3	3	3	3
SSCAFFOLD00001_2260602	3	3	3	2	3	3	3	3	3	3	3	3	3	3	3	2	3	2	3	3	2
SSCAFFOLD00001_2260708	3	3	3	3	3	3	3	3	3	3	3	3	3	3	3	3	3	3	3	3	3
SSCAFFOLD00001_2260777	3	3	3	3	3	3	3	3	3	3	3	3	3	3	3	3	3	3	3	3	3
SSCAFFOLD00001_2260783	3	3	3	3	3	3	3	3	3	3	3	3	3	3	3	3	3	3	3	3	3
SSCAFFOLD00001_2260792	2	2	2	2	2	2	2	2	2	2	2	2	2	2	2	2	2	2	2	2	2
SSCAFFOLD00001_2260817	3	3	3	3	3	3	3	3	3	3	3	3	3	3	3	3	3	3	3	3	3
SSCAFFOLD00001_2265805	3	3	3	3	3	3	3	2	3	2	3	3	3	3	3	3	3	2	3	3	2
SSCAFFOLD00001_2265810	3	3	3	3	3	3	3	2	3	2	3	3	3	3	3	3	3	2	3	3	2
SSCAFFOLD00001_2266827	3	3	3	3	3	2	3	2	3	2	3	3	3	3	3	3	3	3	3	3	2
SSCAFFOLD00001_2283262	3	3	3	3	3	3	3	3	3	3	3	3	3	3	3	3	3	3	3	3	3
SSCAFFOLD00001_2291664	3	3	3	3	3	3	3	3	3	3	3	3	3	3	3	3	3	3	3	3	3
SSCAFFOLD00001_2291739	2	2	2	2	2	2	2	2	2	2	2	2	2	2	2	2	2	2	2	2	2
SSCAFFOLD00001_2291740	3	3	3	3	3	3	3	2	3	3	3	2	3	3	3	3	3	3	3	3	2
SSCAFFOLD00001_2291768	2	2	2	2	2	2	2	2	2	2	2	2	2	2	2	2	2	2	2	2	2
SSCAFFOLD00001_2315079	3	3	3	3	3	3	3	3	3	3	3	3	3	3	3	3	3	3	3	3	3
SSCAFFOLD00001_2327730	3	3	3	3	3	3	3	3	3	3	3	3	3	3	3	3	3	3	3	3	3
SSCAFFOLD00001_2327740	3	3	3	3	3	3	3	3	3	3	3	3	3	3	3	3	3	3	3	3	3
SSCAFFOLD00001_2327814	3	3	3	3	3	3	3	3	3	3	3	3	3	3	3	3	3	3	3	3	3
SSCAFFOLD00001_2327867	3	3	3	3	3	3	3	3	3	3	3	3	3	3	3	3	3	3	3	3	3
SSCAFFOLD00001_2327973	3	3	3	3	3	3	3	3	3	3	3	3	3	3	3	3	3	3	3	3	3
SSCAFFOLD00001_2328002	3	3	3	3	3	3	3	3	3	3	3	3	3	3	3	3	3	3	3	3	3
SSCAFFOLD00001_2331258	3	3	3	3	3	3	3	3	3	3	3	3	3	3	3	3	3	3	3	3	3
SSCAFFOLD00001_2332557	3	3	3	3	3	3	3	3	3	3	3	3	3	3	3	3	3	3	3	3	3
SSCAFFOLD00001_2339113	3	3	3	3	3	2	3	3	3	3	3	3	3	3	3	3	3	3	3	3	2
SSCAFFOLD00001_2339177	3	3	3	3	3	2	3	3	3	3	3	3	3	3	3	3	3	3	3	3	2
SSCAFFOLD00001_2339216	3	3	3	3	3	2	3	3	3	3	3	3	3	3	3	3	3	3	3	3	2
SSCAFFOLD00001_2339239	3	3	3	3	3	3	3	3	3	3	3	3	3	3	3	3	3	3	3	3	3
SSCAFFOLD00001_2339361	3	2	3	2	3	2	3	2	3	3	3	2	3	3	3	3	3	2	3	3	2
SSCAFFOLD00001_2429159	3	3	3	3	3	3	3	3	3	3	3	3	3	3	3	3	3	3	3	3	3
SSCAFFOLD00001_2489119	3	3	3	3	3	3	3	3	3	3	3	3	3	3	3	3	3	3	3	3	3
SSCAFFOLD00001_2499130	3	3	3	3	3	3	3	2	3	3	3	3	3	2	3	2	3	2	3	2	2
SSCAFFOLD00001_2503561	3	3	3	3	3	3	3	3	3	3	3	3	3	3	3	3	3	3	3	3	3
SSCAFFOLD00001_2503570	3	3	3	3	3	3	3	3	3	3	3	3	3	3	3	3	3	3	3	3	3
SSCAFFOLD00001_2503637	3	3	3	3	3	3	3	3	3	3	3	3	3	3	3	3	3	3	3	3	3
SSCAFFOLD00001_2507162	3	3	3	3	3	3	3	3	3	3	3	3	3	3	3	3	3	3	3	3	3
SSCAFFOLD00001_2507168	3	3	3	3	3	3	3	3	3	3	3	3	3	3	3	3	3	3	3	3	3
SSCAFFOLD00001_2507835	3	3	3	3	3	3	3	3	3	3	3	2	3	3	3	3	3	3	3	3	2
SSCAFFOLD00001_2510062	3	3	3	3	3	3	3	3	3	3	3	3	3	3	3	3	3	3	3	3	3
SSCAFFOLD00001_2616766	3	3	3	3	3	2	3	3	3	3	3	2	3	2	3	2	3	3	3	2	2
SSCAFFOLD00001_2644056	3	3	3	3	3	3	3	3	3	3	3	3	3	3	3	3	3	3	3	3	3
SSCAFFOLD00001_2683718	3	2	3	2	3	2	3	2	2	3	3	2	3	2	3	2	3	2	2	3	2
SSCAFFOLD00001_2712511	3	3	3	3	3	2	3	3	3	3	3	3	3	2	3	2	3	3	3	2	2
SSCAFFOLD00001_2741987	3	3	3	3	3	3	3	3	3	3	3	3	3	3	3	3	3	3	3	3	3
SSCAFFOLD00001_2741990	3	3	3	3	3	3	3	3	3	3	3	3	3	3	3	3	3	3	3	3	3
SSCAFFOLD00001_2742427	3	3	3	3	3	3	3	3	3	3	3	3	3	3	3	3	3	3	3	3	3
SSCAFFOLD00001_2742432	3	3	3	3	3	3	3	3	3	3	3	3	3	3	3	3	3	3	3	3	3
SSCAFFOLD00001_2742449	2	3	2	3	3	2	3	2	3	2	3	2	2	3	3	2	3	2	2	3	2
SSCAFFOLD00001_2742469	3	3	3	3	3	3	3	3	3	3	3	3	3	3	3	3	3	3	3	3	3
SSCAFFOLD00001_2742491	3	3	3	3	3	3	3	3	3	3	3	3	3	3	3	3	3	3	3	3	3
SSCAFFOLD00001_2764431	3	3	3	2	3	3	3	3	3	3	3	3	3	3	3	2	3	2	3	3	2
SSCAFFOLD00001_2796130	3	3	3	3	3	3	3	3	3	3	3	3	3	3	3	3	3	3	3	3	3
SSCAFFOLD00001_2796150	3	3	3	3	3	3	3	3	3	3	3	3	3	3	3	3	3	3	3	3	3
SSCAFFOLD00001_2796182	3	3	3	3	3	3	3	3	3	3	3	3	3	3	3	3	3	3	3	3	3
SSCAFFOLD00001_2796184	3	2	3	2	3	3	3	3	3	3	3	3	3	2	3	3	3	3	3	2	2
SSCAFFOLD00001_2796185	3	2	3	2	3	2	3	2	3	2	3	2	3	2	3	2	3	2	3	2	2
SSCAFFOLD00001_2796215	3	3	3	3	3	3	3	3	3	3	3	3	3	3	3	3	3	3	3	3	3
SSCAFFOLD00001_2815235	3	3	3	3	3	3	3	3	3	3	3	3	3	3	3	3	3	3	3	3	3
SSCAFFOLD00001_2815299	3	3	3	2	3	3	3	3	3	3	3	3	3	3	3	3	3	3	3	3	2
SSCAFFOLD00001_2815834	3	3	3	3	3	3	3	3	3	3	3	3	3	2	3	3	3	3	3	3	2
SSCAFFOLD00001_2882521	3	3	3	2	3	2	3	2	3	3	3	2	3	2	3	3	3	2	3	3	2
SSCAFFOLD00001_2882584	3	3	3	3	3	3	3	3	3	3	3	3	3	3	3	3	3	3	3	3	3
SSCAFFOLD00001_2882593	3	3	3	3	3	3	3	3	3	3	3	3	3	3	3	3	3	3	3	3	3
SSCAFFOLD00001_2882648	3	3	3	3	3	2	3	3	3	3	3	2	3	2	3	3	3	3	3	2	2
SSCAFFOLD00001_2894550	3	3	3	3	3	3	3	3	3	3	3	3	3	3	3	3	3	3	3	3	3
SSCAFFOLD00001_3065899	3	2	3	2	3	3	3	3	3	3	3	3	3	3	3	3	3	3	3	3	2
SSCAFFOLD00001_3065914	3	2	3	3	3	3	3	3	3	3	3	3	3	3	3	2	3	2	3	3	2
SSCAFFOLD00001_3065915	2	2	2	2	2	2	2	2	2	2	2	2	2	2	2	2	2	2	2	2	2
SSCAFFOLD00001_3065919	3	2	3	2	3	3	3	3	3	3	3	3	3	3	3	3	3	3	3	3	2
SSCAFFOLD00001_3066101	3	3	3	3	3	2	3	3	3	3	3	2	3	2	3	3	3	3	3	2	2
SSCAFFOLD00001_3066106	3	3	3	3	3	2	3	3	3	3	3	2	3	2	3	3	3	3	3	2	2
SSCAFFOLD00001_3066198	3	2	3	3	3	2	3	2	3	2	3	3	3	3	3	2	3	2	3	3	2
SSCAFFOLD00001_3066222	3	2	3	3	3	3	3	3	3	3	3	3	3	3	3	2	3	2	3	3	2
SSCAFFOLD00001_3067149	3	3	3	3	3	3	3	3	3	3	3	3	3	3	3	3	3	3	3	3	3
SSCAFFOLD00001_3067178	3	2	3	2	3	2	3	2	3	2	2	3	3	2	3	2	3	2	3	2	2
SSCAFFOLD00001_3067220	3	3	3	3	3	3	3	3	3	3	3	3	3	3	3	3	3	3	3	3	3
SSCAFFOLD00001_3067222	3	2	3	2	3	2	3	2	3	2	2	3	3	2	3	2	3	2	3	2	2
SSCAFFOLD00001_3070992	3	3	3	3	3	2	3	3	3	3	3	2	3	2	3	3	3	3	3	2	2
SSCAFFOLD00001_3136697	3	3	3	3	3	3	3	3	3	3	3	3	3	3	3	3	3	3	3	3	3
SSCAFFOLD00001_3146204	3	3	3	3	3	3	3	3	3	3	3	3	3	3	3	3	3	3	3	3	3
SSCAFFOLD00001_3146258	3	2	3	2	3	2	3	2	3	2	3	2	3	2	3	2	3	2	3	2	2
SSCAFFOLD00001_3159585	3	3	3	3	3	3	3	3	3	3	3	3	3	3	3	3	3	3	3	3	3
SSCAFFOLD00001_3159606	3	3	3	3	3	3	3	3	3	3	3	3	3	3	3	3	3	3	3	2	2
SSCAFFOLD00001_3159635	3	3	3	3	3	3	3	3	3	3	3	3	3	2	3	3	3	3	3	3	2
SSCAFFOLD00001_3159673	3	2	3	2	3	2	2	3	3	2	3	2	2	3	3	2	3	2	3	2	2
SSCAFFOLD00001_3159680	2	2	2	2	2	2	2	2	2	2	2	2	2	2	2	2	2	2	2	2	2
SSCAFFOLD00001_3159707	3	3	3	3	3	3	3	3	3	3	3	3	3	2	3	3	3	3	3	3	2
SSCAFFOLD00001_3159720	3	3	3	2	3	3	3	3	3	3	3	3	3	3	3	3	3	3	3	3	2
SSCAFFOLD00001_3187276	3	3	3	3	3	2	3	3	3	2	3	2	3	2	3	2	3	2	3	2	2
SSCAFFOLD00001_3194164	2	2	2	2	2	2	2	2	2	2	2	2	2	2	2	2	2	2	2	2	2
SSCAFFOLD00001_3222136	3	3	3	3	3	3	3	3	3	3	3	3	3	2	3	2	3	3	3	3	2
SSCAFFOLD00001_3254907	3	3	3	2	3	3	3	3	3	3	3	2	3	2	3	3	3	3	3	3	2
SSCAFFOLD00001_3259653	3	3	3	2	3	2	3	2	3	3	3	3	3	2	3	3	3	2	3	3	2
SSCAFFOLD00001_3259667	3	3	3	3	3	3	3	3	3	3	3	3	3	3	3	2	3	3	3	3	2
SSCAFFOLD00001_3278936	3	3	3	3	3	3	3	3	3	3	3	2	3	3	3	3	3	3	3	3	2
SSCAFFOLD00001_3278957	2	2	2	2	2	2	2	2	2	2	2	2	2	2	2	2	2	2	2	2	2
SSCAFFOLD00001_3329594	3	3	3	3	3	2	3	3	3	3	3	2	3	2	3	3	3	3	3	2	2
SSCAFFOLD00001_3329614	3	3	3	3	3	3	3	3	3	3	3	3	3	3	3	3	3	3	3	3	3
SSCAFFOLD00001_3333143	3	3	3	2	3	3	3	2	3	3	3	3	3	3	3	3	3	3	3	3	2
SSCAFFOLD00001_3364766	3	2	3	2	3	2	2	3	3	2	2	3	3	2	3	2	3	2	2	3	2
SSCAFFOLD00001_3364800	3	2	3	2	3	2	2	3	3	2	2	3	3	2	3	2	3	2	2	3	2
SSCAFFOLD00001_3365309	3	3	3	3	3	3	3	3	3	3	3	3	3	3	3	3	3	3	3	3	3
SSCAFFOLD00001_3365372	2	3	3	2	3	2	3	2	3	2	3	2	2	3	3	2	3	2	3	2	2
SSCAFFOLD00001_3377068	3	3	3	3	3	3	3	3	3	3	3	3	3	3	3	3	3	3	3	3	3
SSCAFFOLD00001_3449178	3	3	3	3	3	3	3	3	3	3	3	3	3	3	3	3	3	3	3	3	3
SSCAFFOLD00001_3477604	3	3	3	3	3	3	3	3	3	3	3	3	3	3	3	3	3	3	3	3	3
SSCAFFOLD00001_3478614	3	3	3	3	3	3	3	3	3	3	3	2	3	3	3	3	3	3	3	2	2
SSCAFFOLD00001_3504456	3	3	3	3	3	3	3	3	3	3	3	3	3	3	3	3	3	2	3	3	2
SSCAFFOLD00001_3504461	3	3	3	3	3	3	3	3	3	3	3	3	3	3	3	3	3	2	3	3	2
SSCAFFOLD00001_3504465	3	3	3	3	3	3	3	3	3	3	3	3	3	3	3	3	3	2	3	3	2
SSCAFFOLD00001_3504474	3	3	3	3	3	3	3	3	3	3	3	3	3	3	3	3	3	2	3	3	2
SSCAFFOLD00001_3504596	3	3	3	2	3	3	3	3	3	3	3	3	3	3	3	3	3	2	3	3	2
SSCAFFOLD00001_3504706	3	3	3	3	3	3	3	3	3	3	3	3	3	3	3	2	3	2	3	3	2
SSCAFFOLD00001_3534133	3	3	3	2	3	2	3	3	3	3	3	2	3	3	3	2	3	3	3	3	2
SSCAFFOLD00001_3534366	3	2	3	2	3	2	2	3	3	2	2	3	3	2	3	2	2	3	3	2	2
SSCAFFOLD00001_3546982	3	3	3	2	3	3	3	3	3	3	3	3	3	2	3	3	3	2	3	3	2
SSCAFFOLD00001_3563887	2	2	2	2	2	2	2	2	2	2	2	2	2	2	2	2	2	2	2	2	2
SSCAFFOLD00001_3563950	2	2	2	2	2	2	2	2	2	2	2	2	2	2	2	2	2	2	2	2	2
SSCAFFOLD00001_3563957	2	2	2	2	2	2	2	2	2	2	2	2	2	2	2	2	2	2	2	2	2
SSCAFFOLD00001_3564048	2	2	2	2	2	2	2	2	2	2	2	2	2	2	2	2	2	2	2	2	2
SSCAFFOLD00001_3618766	3	3	3	3	3	3	3	3	3	3	3	3	3	3	3	3	3	3	3	3	3
SSCAFFOLD00001_3618902	3	3	3	3	3	3	3	3	3	3	3	3	3	3	3	3	3	3	3	3	3
SSCAFFOLD00001_3663092	3	3	3	3	3	3	3	3	3	3	3	3	3	3	3	3	3	3	3	3	3
SSCAFFOLD00001_3691430	2	3	2	3	3	2	3	2	3	2	3	2	3	3	3	2	3	2	2	3	2
SSCAFFOLD00001_3691488	3	3	3	3	3	2	3	2	3	3	3	3	3	3	3	3	3	3	3	3	2
SSCAFFOLD00001_3691498	3	3	3	3	3	2	3	2	3	3	3	3	3	3	3	3	3	3	3	3	2
SSCAFFOLD00001_3691550	2	3	2	3	3	2	3	2	3	2	3	2	3	3	3	2	3	2	2	3	2
SSCAFFOLD00001_3691667	3	3	3	3	3	3	3	3	3	2	3	3	3	3	3	3	3	3	3	3	2
SSCAFFOLD00001_3691727	3	3	3	3	3	3	3	3	3	3	3	3	3	3	3	3	3	3	3	3	3
SSCAFFOLD00001_3724978	3	2	2	3	3	2	3	2	2	3	3	2	3	2	3	2	3	2	2	3	2
SSCAFFOLD00001_3725051	3	2	3	2	3	2	3	2	3	2	3	2	3	2	3	2	2	3	3	2	2
SSCAFFOLD00001_3794232	2	2	2	2	2	2	2	2	2	2	2	2	2	2	2	2	2	2	2	2	2
SSCAFFOLD00001_3815953	3	3	3	3	3	2	3	3	3	3	3	3	3	3	3	3	3	3	3	3	2
SSCAFFOLD00001_3819603	3	2	3	2	3	3	3	3	3	2	3	3	3	3	3	3	3	3	3	2	2
SSCAFFOLD00001_3819647	3	3	3	3	3	3	3	3	3	3	3	3	3	3	3	3	3	3	3	3	3
SSCAFFOLD00001_3819921	3	3	3	3	3	2	3	3	3	3	3	3	3	3	3	3	3	3	3	3	2
SSCAFFOLD00001_3828949	3	3	3	3	3	3	3	3	3	3	3	3	3	3	3	3	3	3	3	3	3
SSCAFFOLD00001_3830881	3	2	3	3	3	3	3	3	3	3	3	2	3	3	3	3	3	3	3	3	2
SSCAFFOLD00001_3920456	3	2	3	3	3	3	3	3	3	3	3	3	3	3	3	2	3	2	3	2	2
SSCAFFOLD00001_3920582	3	3	3	2	3	3	3	2	3	3	3	3	3	3	3	3	3	2	3	3	2
SSCAFFOLD00001_3920688	3	2	3	2	3	2	2	3	3	2	2	3	2	3	2	3	2	3	3	2	2
SSCAFFOLD00001_3920759	3	3	3	3	3	3	3	3	3	3	3	2	3	2	3	2	3	2	3	2	2
SSCAFFOLD00001_3920790	3	2	2	3	3	2	3	2	3	2	3	3	3	3	3	3	3	2	3	3	2
SSCAFFOLD00001_3927577	3	3	3	3	3	3	3	3	3	3	3	3	3	3	3	3	3	3	3	3	3
SSCAFFOLD00001_3958658	3	3	3	3	3	3	3	3	3	3	3	3	3	3	3	3	3	3	3	3	3
SSCAFFOLD00001_3958670	3	3	3	3	3	2	3	3	3	3	3	3	3	2	3	3	3	3	3	3	2
SSCAFFOLD00001_3984071	3	3	3	3	3	3	3	3	3	3	3	3	3	3	3	3	3	3	3	3	3
SSCAFFOLD00001_3986495	3	3	3	3	3	3	3	3	3	3	3	3	3	3	3	3	3	3	3	3	3
SSCAFFOLD00001_3999599	3	3	3	2	3	2	3	3	3	3	3	3	3	2	3	3	3	3	3	3	2
SSCAFFOLD00001_4031476	3	3	3	3	3	3	3	3	3	3	3	3	3	3	3	3	3	3	3	3	3
SSCAFFOLD00001_4031723	3	3	3	3	3	3	3	3	3	3	3	3	3	3	3	2	3	2	3	3	2
SSCAFFOLD00001_4045651	3	2	3	3	3	3	3	2	2	3	3	3	3	3	2	3	3	3	3	3	2
SSCAFFOLD00001_4045686	3	2	3	3	3	3	3	2	2	3	3	3	3	3	2	3	3	3	3	3	2
SSCAFFOLD00001_4048298	3	2	3	2	3	2	3	2	3	2	3	2	3	2	3	2	2	3	3	2	2
SSCAFFOLD00001_4048335	2	2	2	2	2	2	2	2	2	2	2	2	2	2	2	2	2	2	2	2	2
SSCAFFOLD00001_4075626	3	3	3	3	3	3	3	3	3	3	3	3	3	3	3	3	3	3	3	3	3
SSCAFFOLD00001_4075638	3	2	3	3	3	3	3	2	3	2	3	2	3	2	3	2	3	3	3	2	2
SSCAFFOLD00001_4082965	3	3	3	3	3	2	3	3	3	3	3	3	3	3	3	3	3	3	3	3	2
SSCAFFOLD00001_4083175	3	3	3	3	3	3	3	3	3	3	3	3	3	3	3	3	3	3	3	3	3
SSCAFFOLD00001_4083220	3	3	3	3	3	3	3	3	3	3	3	3	3	3	3	3	3	3	3	3	3
SSCAFFOLD00001_4101324	3	2	3	2	3	2	3	2	3	2	3	2	3	2	3	2	3	2	3	2	2
SSCAFFOLD00001_4101362	2	3	3	2	3	2	2	3	2	3	3	2	3	2	3	2	3	2	3	2	2
SSCAFFOLD00001_4110642	3	3	3	3	3	3	3	3	3	3	3	3	3	3	3	3	3	3	3	3	3
SSCAFFOLD00001_4110654	3	3	3	2	3	3	3	3	3	2	3	3	3	3	3	3	3	3	3	3	2
SSCAFFOLD00001_4110662	3	3	3	3	3	3	3	3	3	3	3	3	3	3	3	3	3	3	3	3	3
SSCAFFOLD00001_4146653	3	3	3	3	3	3	3	3	3	3	3	3	3	3	3	3	3	3	3	3	3
SSCAFFOLD00001_4146716	3	2	3	2	3	3	3	2	3	3	3	3	3	3	3	2	3	3	3	2	2
SSCAFFOLD00001_4178367	3	3	3	3	3	3	3	3	3	3	3	3	3	3	3	3	3	3	3	3	3
SSCAFFOLD00001_4178718	3	2	2	3	3	2	3	2	3	2	2	3	3	2	3	2	3	2	2	3	2
SSCAFFOLD00001_4194605	3	3	3	3	3	2	3	3	3	3	3	3	3	3	3	3	3	2	3	3	2
SSCAFFOLD00001_4214419	2	3	3	2	3	2	3	2	2	3	3	2	3	2	3	2	3	2	2	3	2
SSCAFFOLD00001_4214446	3	3	3	3	3	3	3	3	3	3	3	3	3	3	3	3	3	3	3	3	3
SSCAFFOLD00001_4214458	3	2	3	3	3	2	3	3	3	2	3	2	3	3	3	2	3	2	2	3	2
SSCAFFOLD00001_4214471	3	3	3	2	3	2	2	3	3	3	3	2	3	2	3	2	3	2	3	2	2
SSCAFFOLD00001_4256799	2	3	3	2	3	2	3	2	2	3	3	2	3	2	3	2	3	2	2	3	2
SSCAFFOLD00001_4256863	2	3	3	2	3	2	3	2	2	3	3	2	3	2	3	2	3	2	2	3	2
SSCAFFOLD00001_4256869	3	3	3	3	3	3	3	3	3	3	3	3	3	3	3	3	3	3	3	3	3
SSCAFFOLD00001_4292928	3	2	3	2	3	2	3	2	2	3	3	2	3	2	3	2	3	2	3	2	2
SSCAFFOLD00001_4292943	3	3	3	3	3	3	3	3	3	3	3	3	3	2	3	2	3	2	3	3	2
SSCAFFOLD00001_4293121	3	3	3	3	3	3	3	3	3	3	3	3	3	2	3	2	3	2	3	2	2
SSCAFFOLD00001_4293130	3	3	2	3	2	3	3	2	3	2	3	3	3	2	3	2	3	2	3	3	2
SSCAFFOLD00001_4293158	3	3	3	2	3	3	3	3	3	3	3	2	3	3	3	2	3	2	3	3	2
SSCAFFOLD00001_4293165	2	3	3	2	2	3	3	2	3	2	3	2	3	2	3	2	3	2	3	2	2
SSCAFFOLD00001_4293210	3	3	3	3	3	3	3	3	3	3	3	3	3	2	3	2	3	2	3	2	2
SSCAFFOLD00001_4293237	3	3	3	3	3	3	3	3	3	3	3	3	3	3	3	3	3	3	3	3	3
SSCAFFOLD00001_4313722	3	3	3	2	3	2	3	2	3	2	3	3	3	3	3	3	3	3	3	3	2
SSCAFFOLD00001_4315492	3	3	3	3	3	3	3	3	3	3	3	3	3	3	3	3	3	2	3	3	2
SSCAFFOLD00001_4315508	3	3	3	3	3	3	3	3	3	3	3	3	3	3	3	3	3	2	3	3	2
SSCAFFOLD00001_4315794	3	3	3	3	3	3	3	3	3	2	3	3	3	3	3	3	3	2	3	3	2
SSCAFFOLD00001_4315799	3	3	3	3	3	3	3	3	3	3	3	3	3	3	3	3	3	2	3	3	2
SSCAFFOLD00001_4315800	3	2	3	2	3	2	3	2	3	3	3	3	3	2	3	2	3	2	3	3	2
SSCAFFOLD00001_4315805	3	3	3	3	3	3	3	3	3	3	3	3	3	3	3	3	3	2	3	3	2
SSCAFFOLD00001_4315840	3	3	3	3	3	3	3	3	3	3	3	3	3	3	3	3	3	2	3	3	2
SSCAFFOLD00001_4417474	2	2	2	2	2	2	2	2	2	2	2	2	2	2	2	2	2	2	2	2	2
SSCAFFOLD00001_4417498	2	2	2	2	2	2	2	2	2	2	2	2	2	2	2	2	2	2	2	2	2
SSCAFFOLD00001_4417541	2	2	2	2	2	2	2	2	2	2	2	2	2	2	2	2	2	2	2	2	2
SSCAFFOLD00001_4598304	3	2	3	2	3	2	3	3	3	2	3	3	3	3	3	3	3	2	3	2	2
SSCAFFOLD00001_4600581	3	2	3	3	3	3	3	2	3	2	3	3	3	3	3	2	3	3	3	3	2
SSCAFFOLD00001_4600597	3	2	3	3	2	3	3	3	3	3	3	2	3	3	3	3	3	3	3	3	2
SSCAFFOLD00001_4600619	3	3	3	3	3	3	3	3	3	2	3	3	3	3	3	3	3	3	3	2	2
SSCAFFOLD00001_4600620	3	2	3	3	3	2	3	3	3	2	3	2	3	3	3	2	3	2	2	3	2
SSCAFFOLD00001_4600660	2	2	2	2	2	2	2	2	2	2	2	2	2	2	2	2	2	2	2	2	2
SSCAFFOLD00001_4661514	2	2	2	2	2	2	2	2	2	2	2	2	2	2	2	2	2	2	2	2	2
SSCAFFOLD00001_4661616	3	2	3	2	3	2	3	2	3	3	3	2	3	2	3	2	3	3	3	2	2
SSCAFFOLD00001_4661727	3	2	3	2	3	2	3	2	3	2	3	2	3	2	3	2	2	3	3	2	2
SSCAFFOLD00001_4673487	3	2	3	2	3	3	3	3	3	2	3	2	3	2	3	3	3	3	3	3	2
SSCAFFOLD00001_4675947	3	3	3	3	3	3	3	3	3	3	3	3	3	3	3	3	3	3	3	3	3
SSCAFFOLD00001_4675952	3	2	3	2	3	2	3	2	3	2	3	2	3	2	3	2	3	2	3	2	2
SSCAFFOLD00001_4675962	3	2	3	2	3	2	2	3	3	2	3	2	2	3	3	2	3	2	2	3	2
SSCAFFOLD00001_4701880	3	3	3	3	3	3	3	3	3	3	3	2	3	3	3	2	3	3	3	3	2
SSCAFFOLD00001_4701922	3	3	3	3	3	3	3	3	3	3	3	3	3	3	3	3	3	3	3	3	3
SSCAFFOLD00001_4701985	3	3	3	3	3	3	3	3	3	3	3	3	3	3	3	3	3	3	3	3	3
SSCAFFOLD00001_4717744	3	3	3	3	3	3	3	3	3	3	3	3	3	3	3	3	3	3	3	3	3
SSCAFFOLD00001_4722233	2	2	2	2	2	2	2	2	2	2	2	2	2	2	2	2	2	2	2	2	2
SSCAFFOLD00001_4722280	3	3	3	3	3	3	3	3	3	3	3	3	3	3	3	3	3	3	3	3	3
SSCAFFOLD00001_4770345	3	2	3	2	3	2	3	3	3	2	3	2	3	2	3	3	3	3	3	3	2
SSCAFFOLD00001_4770430	3	3	3	3	3	3	3	3	3	2	3	2	3	3	3	3	3	3	3	2	2
SSCAFFOLD00001_4779371	2	2	2	2	2	2	2	2	2	2	2	2	2	2	2	2	2	2	2	2	2
SSCAFFOLD00001_4811678	3	3	3	3	3	3	3	3	3	3	3	3	3	3	3	3	3	3	3	3	3
SSCAFFOLD00001_4811690	3	2	3	2	3	2	2	3	3	2	3	2	3	2	3	2	3	2	2	3	2
SSCAFFOLD00001_4834360	3	2	3	3	3	2	3	2	3	2	3	3	3	3	3	2	3	3	2	3	2
SSCAFFOLD00001_4834396	3	3	3	3	3	2	3	2	3	2	3	3	3	2	3	2	3	3	3	2	2
SSCAFFOLD00001_4886941	2	2	2	2	2	2	2	2	2	2	2	2	2	2	2	2	2	2	2	2	2
SSCAFFOLD00001_4886960	3	3	3	3	3	3	3	3	3	3	3	3	3	3	3	3	3	3	3	3	3
SSCAFFOLD00001_4887343	3	3	3	3	3	3	3	3	3	3	3	3	3	3	3	3	3	3	3	3	3
SSCAFFOLD00001_4898365	3	3	3	3	3	3	3	3	3	3	3	3	3	3	3	3	3	3	3	3	3
SSCAFFOLD00001_4902001	3	2	3	2	3	2	3	2	3	2	3	2	2	3	3	2	2	3	2	3	2
SSCAFFOLD00001_4902026	3	2	3	3	3	3	3	2	3	3	3	2	3	2	3	3	3	3	3	2	2
SSCAFFOLD00001_4902134	3	3	3	3	3	3	3	3	3	3	3	3	3	2	3	3	3	3	3	3	2
SSCAFFOLD00001_4902294	3	3	3	3	3	3	3	3	3	2	3	2	3	3	3	3	3	3	3	2	2
SSCAFFOLD00001_4902917	3	2	3	2	3	2	3	2	3	2	3	2	3	2	3	2	2	3	3	2	2
SSCAFFOLD00001_4916651	3	3	3	3	3	3	3	3	3	3	3	3	3	3	3	3	3	3	3	3	3
SSCAFFOLD00001_4963115	3	3	3	3	3	3	3	3	3	3	3	3	3	3	3	3	3	3	3	3	3
SSCAFFOLD00001_4966117	3	2	3	3	3	3	3	3	3	3	3	3	3	3	3	3	3	3	3	3	2
SSCAFFOLD00001_4968341	3	2	3	3	3	3	3	3	3	3	3	3	3	3	3	3	3	3	3	3	2
SSCAFFOLD00001_4993140	3	2	3	2	3	2	2	3	3	2	3	2	3	2	3	2	3	2	2	3	2
SSCAFFOLD00001_4993188	3	3	3	3	3	3	3	3	3	3	3	3	3	3	3	3	3	3	3	3	3
SSCAFFOLD00001_5008845	3	2	3	2	3	2	2	3	3	2	3	2	2	3	3	2	3	2	2	3	2
SSCAFFOLD00001_5024160	3	2	2	3	3	2	3	2	3	2	2	3	3	2	3	2	3	2	2	3	2
SSCAFFOLD00001_5038040	3	3	3	3	3	3	3	3	3	3	3	3	3	3	3	3	3	3	3	3	3
SSCAFFOLD00001_5038056	3	3	3	3	3	3	3	3	3	3	3	3	3	3	3	3	3	3	3	3	3
SSCAFFOLD00001_5071309	3	3	3	3	3	3	3	3	3	3	3	3	3	3	3	3	3	3	3	3	3
SSCAFFOLD00001_5071526	3	3	3	2	3	2	3	2	3	2	3	3	2	3	3	3	3	2	3	3	2
SSCAFFOLD00001_5071604	3	2	3	2	3	3	3	3	3	2	3	3	3	2	3	3	3	3	3	2	2
SSCAFFOLD00001_5086073	3	3	3	3	3	3	3	3	3	3	3	3	3	3	3	3	3	3	3	3	3
SSCAFFOLD00001_5100549	3	2	3	2	3	2	3	2	3	2	3	2	3	2	3	2	3	2	3	2	2
SSCAFFOLD00001_5100559	2	2	2	2	2	2	2	2	2	2	2	2	2	2	2	2	2	2	2	2	2
SSCAFFOLD00001_5147755	3	3	3	3	3	2	3	3	3	3	3	3	3	3	3	2	3	3	3	3	2
SSCAFFOLD00001_5147843	3	3	3	3	3	3	3	3	3	3	3	3	3	3	3	3	3	3	3	3	3
SSCAFFOLD00001_5161366	3	3	3	3	3	3	3	3	3	3	3	3	3	3	3	3	3	3	3	3	3
SSCAFFOLD00001_5161378	3	3	3	2	3	3	3	3	3	2	3	3	3	2	3	2	3	3	3	2	2
SSCAFFOLD00001_5161396	3	2	3	3	3	2	3	3	3	2	3	2	3	2	3	2	3	2	3	3	2
SSCAFFOLD00001_5161442	3	2	2	3	3	2	3	2	3	2	3	3	3	3	3	2	3	2	3	3	2
SSCAFFOLD00001_5161445	3	2	3	2	3	2	3	2	3	2	3	2	3	2	3	2	2	3	3	2	2
SSCAFFOLD00001_5161453	3	3	3	3	3	3	3	3	3	3	3	3	3	3	3	3	3	3	3	3	3
SSCAFFOLD00001_5169921	3	3	3	3	3	3	3	3	3	3	3	3	3	3	3	3	3	3	3	3	3
SSCAFFOLD00001_5170115	3	3	3	3	3	3	3	3	3	3	3	3	3	3	3	3	3	3	3	3	3
SSCAFFOLD00001_5170134	3	3	3	3	3	3	3	2	3	3	3	3	3	3	3	3	3	2	3	2	2
SSCAFFOLD00001_5170175	2	3	2	3	3	2	3	2	3	2	3	2	2	3	3	2	3	2	3	2	2
SSCAFFOLD00001_5170181	3	3	3	3	3	2	3	3	3	2	3	3	3	3	3	2	3	2	3	3	2
SSCAFFOLD00001_5170196	3	3	3	3	3	3	3	3	3	3	3	3	3	3	3	3	3	3	3	3	3
SSCAFFOLD00001_5225905	3	3	3	3	3	3	3	3	3	3	3	3	3	3	3	3	3	3	3	3	3
SSCAFFOLD00001_5226750	3	3	3	2	3	3	3	3	3	3	3	3	3	3	3	3	3	3	3	3	2
SSCAFFOLD00001_5227958	3	2	3	3	3	3	3	3	3	3	3	2	3	2	3	3	3	3	3	2	2
SSCAFFOLD00001_5230931	3	2	3	3	3	3	3	3	3	3	3	3	3	3	3	3	3	3	3	3	2
SSCAFFOLD00001_5247759	3	3	3	3	3	3	3	3	3	3	3	3	3	3	3	3	3	3	3	3	3
SSCAFFOLD00001_5247782	3	2	3	3	3	3	3	3	3	3	3	2	3	2	3	3	3	3	3	2	2
SSCAFFOLD00001_5247790	3	3	3	2	3	3	3	3	3	2	3	3	3	2	3	2	3	2	3	2	2
SSCAFFOLD00001_5248919	3	2	3	2	3	2	3	2	3	2	3	3	3	2	3	2	3	3	3	2	2
SSCAFFOLD00001_5269152	3	2	3	3	3	3	3	3	3	3	3	2	3	2	3	3	3	3	3	2	2
SSCAFFOLD00001_5269169	3	3	3	2	3	2	3	3	3	2	3	2	3	3	3	2	3	3	3	3	2
SSCAFFOLD00001_5269179	3	3	3	3	3	3	3	3	3	3	3	3	3	3	3	3	3	3	3	3	3
SSCAFFOLD00001_5269197	3	3	3	3	3	3	3	3	3	3	3	3	3	3	3	3	3	3	3	3	3
SSCAFFOLD00001_5453567	3	2	2	3	3	2	3	2	3	2	2	3	2	3	2	3	3	2	3	2	2
SSCAFFOLD00001_5506477	3	3	3	3	3	3	3	3	3	3	3	3	3	3	3	3	3	3	3	3	3
SSCAFFOLD00001_5511509	3	3	3	3	3	3	3	3	3	3	3	3	3	3	3	3	3	3	3	3	3
SSCAFFOLD00001_5511531	3	3	3	3	3	3	3	3	3	3	3	3	3	3	3	3	3	3	3	3	3
SSCAFFOLD00001_5511758	3	2	3	3	3	3	3	3	3	3	3	2	3	2	3	3	3	3	3	2	2
SSCAFFOLD00001_5546326	3	3	3	2	3	3	3	3	3	3	3	2	3	3	3	3	3	3	3	3	2
SSCAFFOLD00001_5589734	3	3	3	3	3	3	3	3	3	3	3	3	3	3	3	2	3	2	3	3	2
SSCAFFOLD00001_5589769	3	3	3	3	3	3	3	3	3	3	3	3	3	3	3	3	3	3	3	3	3
SSCAFFOLD00001_5589775	3	2	3	2	3	2	3	2	3	2	2	3	3	2	3	2	3	2	3	2	2
SSCAFFOLD00001_5612529	2	2	2	2	2	2	2	2	2	2	2	2	2	2	2	2	2	2	2	2	2
SSCAFFOLD00001_5612592	3	3	3	3	3	3	3	3	3	3	3	3	3	3	3	2	3	3	3	3	2
SSCAFFOLD00001_5612635	3	3	3	3	3	3	3	3	3	3	3	3	3	3	3	3	3	3	3	3	3
SSCAFFOLD00001_5619619	3	3	3	3	3	3	3	3	3	3	3	3	3	3	3	3	3	3	3	3	3
SSCAFFOLD00001_5706615	3	2	2	3	3	2	3	2	3	2	3	2	3	2	3	2	3	2	2	3	2
SSCAFFOLD00001_5706622	3	3	3	3	3	3	3	2	3	2	3	3	3	3	3	2	3	2	3	2	2
SSCAFFOLD00001_5757797	3	3	2	3	2	3	3	2	3	2	3	2	3	3	3	2	3	2	3	2	2
SSCAFFOLD00001_5757803	3	2	3	3	3	2	3	3	3	3	3	3	3	2	3	3	3	2	3	3	2
SSCAFFOLD00001_5793986	3	3	3	3	3	3	3	3	3	3	3	3	3	3	3	3	3	3	3	3	3
SSCAFFOLD00001_5796898	3	3	3	3	3	3	3	3	3	3	3	3	3	3	3	3	3	3	3	2	2
SSCAFFOLD00001_5797260	3	3	3	3	3	3	3	3	3	3	3	3	3	3	3	3	3	3	3	3	3
SSCAFFOLD00001_5800324	3	3	3	2	3	3	3	2	3	2	3	2	3	3	3	3	3	2	2	3	2
SSCAFFOLD00001_5800417	3	3	3	3	3	3	3	3	3	3	3	3	3	3	3	3	3	3	3	3	3
SSCAFFOLD00001_5800493	3	2	3	2	3	2	3	3	3	2	3	2	3	2	3	3	3	2	3	2	2
SSCAFFOLD00001_5814201	3	3	3	3	3	2	3	3	3	3	3	2	3	3	3	3	3	3	3	3	2
SSCAFFOLD00001_5823647	3	2	3	2	3	2	3	2	3	2	3	2	3	2	3	2	3	2	3	2	2
SSCAFFOLD00001_5824641	3	2	3	2	3	2	2	3	2	3	2	3	3	2	3	2	3	2	3	2	2
SSCAFFOLD00001_5824667	3	2	3	2	3	2	2	3	2	3	2	3	3	2	3	2	3	2	3	2	2
SSCAFFOLD00001_5824673	3	3	3	3	3	3	3	3	3	3	3	3	3	3	3	3	3	3	3	3	3
SSCAFFOLD00001_5824767	3	2	3	3	3	2	3	3	3	2	3	3	3	2	3	2	3	2	3	3	2
SSCAFFOLD00001_5824805	3	2	3	2	3	2	2	3	2	3	2	3	3	2	3	2	3	2	3	2	2
SSCAFFOLD00001_5824823	3	2	3	2	3	2	2	3	2	3	2	3	3	2	3	2	3	2	3	2	2
SSCAFFOLD00001_5825623	3	3	3	3	3	3	3	3	3	3	3	3	3	3	3	3	3	3	3	3	3
SSCAFFOLD00001_5825652	3	3	3	3	3	3	3	3	3	3	3	3	3	3	3	3	3	3	3	3	3
SSCAFFOLD00001_5825837	3	3	3	3	3	3	3	3	3	3	3	3	3	3	3	3	3	3	3	3	3
SSCAFFOLD00001_5825912	3	3	3	3	3	3	3	3	3	3	3	3	3	3	3	3	3	3	3	3	3
SSCAFFOLD00001_5825916	2	2	2	2	2	2	2	2	2	2	2	2	2	2	2	2	2	2	2	2	2
SSCAFFOLD00001_5834286	3	3	3	3	3	3	3	3	3	3	3	3	3	3	3	3	3	3	3	3	3
SSCAFFOLD00001_5834397	3	3	3	3	3	3	3	3	3	3	3	3	3	3	3	3	3	3	3	3	3
SSCAFFOLD00001_5834407	3	2	3	3	3	3	3	3	3	3	3	3	3	3	3	3	3	3	3	3	2
SSCAFFOLD00001_5834703	3	3	3	3	3	3	3	3	3	3	3	3	3	3	3	3	3	3	3	3	3
SSCAFFOLD00001_5834892	3	3	3	3	3	3	3	3	3	3	3	3	3	3	3	3	3	3	3	3	3
SSCAFFOLD00001_5837865	3	2	3	2	3	2	3	2	3	3	3	3	3	2	3	2	3	2	3	2	2
SSCAFFOLD00001_5867319	2	2	2	2	2	2	2	2	2	2	2	2	2	2	2	2	2	2	2	2	2
SSCAFFOLD00001_5867338	2	2	2	2	2	2	2	2	2	2	2	2	2	2	2	2	2	2	2	2	2
SSCAFFOLD00001_5895330	3	3	3	3	3	3	3	3	3	3	3	3	3	3	3	3	3	3	3	3	3
SSCAFFOLD00001_5895398	2	2	2	2	2	2	2	2	2	2	2	2	2	2	2	2	2	2	2	2	2
SSCAFFOLD00001_5909580	3	2	2	3	3	2	3	2	3	2	2	3	3	2	3	2	3	2	2	3	2
SSCAFFOLD00001_5909685	2	2	2	2	2	2	2	2	2	2	2	2	2	2	2	2	2	2	2	2	2
SSCAFFOLD00001_5909792	3	3	3	2	3	2	3	2	3	2	2	3	3	2	3	3	3	2	3	3	2
SSCAFFOLD00001_5946004	3	3	3	3	3	3	3	3	3	3	3	3	3	3	3	3	3	3	3	3	3
SSCAFFOLD00001_6012053	3	3	3	3	3	3	3	3	3	3	3	3	3	3	3	3	3	3	3	3	3
SSCAFFOLD00001_6012194	3	3	3	3	3	2	3	3	3	3	3	3	3	3	3	3	3	3	3	3	2
SSCAFFOLD00001_6012252	3	3	3	3	3	3	3	3	3	3	3	3	3	3	3	3	3	3	3	3	3
SSCAFFOLD00001_6054616	3	2	3	2	3	2	3	2	3	2	3	2	3	2	3	2	3	2	3	2	2
SSCAFFOLD00001_6158233	3	3	3	3	3	3	3	3	3	3	3	3	3	3	3	3	3	3	3	3	3
SSCAFFOLD00001_6169435	3	3	3	3	3	3	3	3	3	3	3	3	3	3	3	3	3	3	3	3	3
SSCAFFOLD00001_6169462	3	2	2	3	3	2	3	2	3	2	3	3	3	2	3	3	3	2	3	3	2
SSCAFFOLD00001_6202651	3	3	3	3	3	3	3	3	3	3	3	3	3	3	3	3	3	3	3	3	3
SSCAFFOLD00001_6202681	3	3	3	3	3	3	3	3	3	3	3	3	3	3	3	3	3	3	3	3	3
SSCAFFOLD00001_6211875	3	2	3	2	3	2	3	2	3	2	3	2	3	2	3	2	3	2	3	2	2
SSCAFFOLD00001_6211903	3	3	3	3	3	3	3	3	3	3	3	2	3	2	3	2	3	2	3	3	2
SSCAFFOLD00001_6211919	3	3	3	3	3	3	3	3	3	3	3	2	3	2	3	2	3	2	3	3	2
SSCAFFOLD00001_6220902	3	3	3	3	3	2	3	3	3	3	3	2	3	3	3	3	3	2	3	3	2
SSCAFFOLD00001_6234555	3	3	3	2	3	3	3	2	3	2	3	2	3	3	3	2	3	3	3	3	2
SSCAFFOLD00001_6234569	3	3	3	2	3	3	3	2	3	2	3	2	3	3	3	2	3	3	3	3	2
SSCAFFOLD00001_6295166	3	3	3	3	3	2	3	3	3	2	3	3	3	3	3	3	3	2	3	3	2
SSCAFFOLD00001_6332992	3	2	3	2	3	3	3	3	3	3	3	3	3	3	3	3	3	2	3	3	2
SSCAFFOLD00001_6333064	3	2	3	2	3	3	3	3	3	3	3	3	3	3	3	3	3	2	3	3	2
SSCAFFOLD00001_6333067	3	3	3	3	3	3	3	3	3	3	3	2	3	3	3	3	3	3	3	3	2
SSCAFFOLD00001_6333088	3	2	3	2	3	3	3	3	3	3	3	3	3	3	3	3	3	2	3	3	2
SSCAFFOLD00001_6333098	3	2	3	2	3	3	3	3	3	3	3	3	3	3	3	3	3	2	3	3	2
SSCAFFOLD00001_6333106	3	2	3	2	3	3	3	3	3	3	3	3	3	3	3	3	3	2	3	3	2
SSCAFFOLD00001_6410045	3	3	3	3	3	3	3	3	3	3	3	3	3	3	3	3	3	3	3	3	3
SSCAFFOLD00001_6410093	3	3	3	3	3	3	3	3	3	3	3	3	3	3	3	3	3	3	3	3	3
SSCAFFOLD00001_6411819	3	3	3	3	3	3	3	3	3	3	3	3	3	3	3	3	3	3	3	3	3
SSCAFFOLD00001_6411858	3	2	3	3	3	3	3	2	3	2	3	3	3	3	3	3	3	2	3	3	2
SSCAFFOLD00001_6411872	3	3	3	3	3	3	3	3	3	3	3	3	3	3	3	3	3	3	3	3	3
SSCAFFOLD00001_6436269	2	2	2	2	2	2	2	2	2	2	2	2	2	2	2	2	2	2	2	2	2
SSCAFFOLD00001_6436292	2	2	2	2	2	2	2	2	2	2	2	2	2	2	2	2	2	2	2	2	2
SSCAFFOLD00001_6497213	3	3	3	3	3	3	3	3	3	3	3	3	3	3	3	3	3	3	3	3	3
SSCAFFOLD00001_6499734	2	3	3	2	3	2	2	3	2	3	3	2	3	2	3	2	3	2	3	2	2
SSCAFFOLD00001_6499760	3	3	3	3	3	3	3	2	3	2	3	2	3	2	3	3	3	3	3	2	2
SSCAFFOLD00001_6515345	3	3	3	3	3	3	3	3	3	3	3	3	3	3	3	3	3	3	3	3	3
SSCAFFOLD00001_6515356	3	3	3	3	3	3	3	3	3	3	3	3	3	3	3	3	3	3	3	2	2
SSCAFFOLD00001_6515395	3	3	3	3	3	3	3	3	3	3	3	3	3	3	3	3	3	3	3	2	2
SSCAFFOLD00001_6531530	3	3	3	3	3	3	3	3	3	3	3	3	3	3	3	3	3	3	3	3	3
SSCAFFOLD00001_6531569	3	3	3	3	3	3	3	3	3	3	3	3	3	3	3	3	3	3	3	3	3
SSCAFFOLD00001_6531583	3	2	3	3	3	3	3	3	3	3	3	2	3	2	3	3	3	3	3	2	2
SSCAFFOLD00001_6543772	3	2	3	2	3	2	3	2	3	2	3	2	3	2	3	2	3	2	3	2	2
SSCAFFOLD00001_6543785	2	3	3	2	3	2	3	3	3	3	3	2	3	3	3	3	3	2	3	3	2
SSCAFFOLD00001_6543842	3	3	3	3	3	3	3	3	3	3	3	3	3	3	3	3	3	3	3	3	3
SSCAFFOLD00001_6552909	3	3	3	3	3	3	3	3	3	3	3	3	3	3	3	3	3	3	3	3	3
SSCAFFOLD00001_6556906	3	3	3	2	3	3	3	2	3	3	3	2	3	3	3	3	3	3	3	2	2
SSCAFFOLD00001_6557071	3	3	3	3	3	3	3	3	3	3	3	3	3	3	3	3	3	3	3	3	3
SSCAFFOLD00001_6557118	3	3	3	2	3	3	3	3	3	3	3	2	3	3	3	3	3	3	3	2	2
SSCAFFOLD00001_6557166	3	3	3	3	3	3	3	3	3	3	3	3	3	3	3	3	3	3	3	3	3
SSCAFFOLD00001_6562808	2	2	2	2	2	2	2	2	2	2	2	2	2	2	2	2	2	2	2	2	2
SSCAFFOLD00001_6562898	2	3	3	2	3	2	3	2	3	2	3	2	3	2	2	3	2	3	3	2	2
SSCAFFOLD00001_6562967	3	3	3	3	3	3	3	3	3	3	3	3	3	3	3	3	3	3	3	3	3
SSCAFFOLD00001_6562976	3	3	3	3	3	3	3	3	3	3	3	3	3	3	3	3	3	3	3	3	3
SSCAFFOLD00001_6563047	3	3	3	3	3	3	3	3	3	3	3	3	3	3	3	3	3	3	3	3	3
SSCAFFOLD00001_6563067	3	3	3	3	3	3	3	3	3	3	3	3	3	3	3	3	3	3	3	3	3
SSCAFFOLD00001_6563123	3	3	3	3	3	3	3	3	3	3	3	3	3	3	3	3	3	3	3	3	3
SSCAFFOLD00001_6563138	3	3	3	2	3	3	3	3	3	3	3	3	3	3	3	2	3	3	3	3	2
SSCAFFOLD00001_6573930	3	3	3	3	3	3	3	3	3	3	3	3	3	3	3	3	3	3	3	3	3
SSCAFFOLD00001_6582458	2	3	2	3	2	3	3	2	3	2	3	2	3	2	3	2	3	2	3	2	2
SSCAFFOLD00001_6599934	3	2	3	2	3	2	3	3	3	2	3	3	3	2	3	3	3	2	3	2	2
SSCAFFOLD00001_6599963	3	3	3	2	3	2	3	3	3	3	3	3	3	3	3	2	3	2	3	2	2
SSCAFFOLD00001_6599997	3	3	3	2	3	2	3	3	3	3	3	3	3	3	3	2	3	2	3	2	2
SSCAFFOLD00001_6608430	3	3	3	3	3	3	3	3	3	3	3	3	3	2	3	2	3	3	3	2	2
SSCAFFOLD00001_6613769	3	3	3	3	3	3	3	3	3	3	3	3	3	3	3	3	3	3	3	3	3
SSCAFFOLD00001_6613820	3	2	3	3	3	3	3	3	3	3	3	3	3	3	3	2	3	2	3	3	2
SSCAFFOLD00001_6618631	3	3	3	3	3	3	3	3	3	3	3	3	3	3	3	3	3	3	3	3	3
SSCAFFOLD00001_6618703	3	3	3	3	3	2	3	3	3	3	3	3	3	3	3	2	3	3	3	3	2
SSCAFFOLD00001_6618731	3	2	2	3	3	2	3	2	3	2	3	2	3	2	3	2	3	2	2	3	2
SSCAFFOLD00001_6630612	3	3	3	3	3	3	3	3	3	3	3	3	3	3	3	3	3	3	3	3	3
SSCAFFOLD00001_6642420	3	3	3	3	3	3	3	3	3	3	3	3	3	3	3	3	3	3	3	3	3
SSCAFFOLD00001_6642468	3	2	3	2	3	2	3	2	3	2	3	2	3	2	3	2	3	2	3	2	2
SSCAFFOLD00001_6642603	3	3	3	3	3	2	3	3	3	3	3	3	3	2	3	2	3	3	3	2	2
SSCAFFOLD00001_6652485	3	2	2	3	3	3	3	3	3	2	3	3	3	3	3	3	3	2	3	2	2
SSCAFFOLD00001_6703295	3	3	3	3	3	3	3	3	3	3	3	3	3	3	3	3	3	3	3	3	3
SSCAFFOLD00001_6703403	2	2	2	2	2	2	2	2	2	2	2	2	2	2	2	2	2	2	2	2	2
SSCAFFOLD00001_6733981	3	2	2	3	3	2	3	2	3	2	3	2	3	2	3	2	3	2	2	3	2
SSCAFFOLD00001_6748037	3	3	3	3	3	3	3	3	3	3	3	3	3	3	3	3	3	3	3	3	3
SSCAFFOLD00001_6748090	3	3	3	3	3	3	3	3	3	3	3	3	3	3	3	3	3	3	3	3	3
SSCAFFOLD00001_6804485	3	3	3	3	3	3	3	3	3	3	3	3	3	3	3	3	3	3	3	3	3
SSCAFFOLD00001_6804614	3	3	3	3	3	3	3	3	3	3	3	3	3	3	3	3	3	3	3	3	3
SSCAFFOLD00001_6891474	3	3	3	3	3	3	3	3	3	3	3	3	3	3	3	3	3	3	3	3	3
SSCAFFOLD00001_6905758	3	3	3	3	3	3	3	3	3	3	3	3	3	3	3	3	3	3	3	3	3
SSCAFFOLD00001_6943785	2	3	3	2	3	3	2	3	3	3	2	3	3	2	2	3	3	2	2	3	2
SSCAFFOLD00001_6976369	3	3	3	3	3	3	3	3	3	3	3	3	3	3	3	2	3	2	3	3	2
SSCAFFOLD00001_6976416	2	3	3	2	3	2	2	3	3	2	3	2	2	3	3	2	3	2	3	2	2
SSCAFFOLD00001_7005037	3	3	3	3	3	3	3	3	3	3	3	3	3	3	3	3	3	3	3	3	3
SSCAFFOLD00001_7005043	3	2	3	2	3	2	3	2	3	3	3	2	3	2	3	2	3	3	3	2	2
SSCAFFOLD00001_7005057	3	3	3	2	2	3	2	3	3	3	3	3	3	3	3	3	3	2	3	2	2
SSCAFFOLD00001_7008526	3	3	3	3	3	3	3	3	3	3	3	3	3	3	3	3	3	3	3	3	3
SSCAFFOLD00001_7200174	2	3	3	3	3	2	3	3	3	2	3	3	3	3	3	3	3	2	3	3	2
SSCAFFOLD00001_7200216	3	2	3	2	3	2	3	2	3	2	3	2	3	2	3	2	3	2	3	2	2
SSCAFFOLD00001_7200222	3	2	3	2	3	2	3	2	3	2	3	2	3	2	3	2	3	2	3	2	2
SSCAFFOLD00001_7203342	3	2	3	2	3	3	3	3	3	2	3	3	3	2	3	3	3	3	3	3	2
SSCAFFOLD00001_7203430	3	3	3	3	3	3	3	3	3	3	3	3	3	3	3	3	3	3	3	3	3
SSCAFFOLD00001_7203576	3	3	3	3	3	3	3	3	3	3	3	3	3	3	3	3	3	3	3	3	3
SSCAFFOLD00001_7203786	3	2	3	2	3	3	3	3	3	3	3	3	3	2	3	3	3	2	3	3	2
SSCAFFOLD00001_7203898	3	3	3	3	3	3	3	3	3	2	3	3	3	3	3	3	3	3	3	3	2
SSCAFFOLD00001_7216155	3	3	3	2	3	3	3	2	2	3	3	3	3	2	3	2	3	2	3	3	2
SSCAFFOLD00001_7216415	3	2	3	3	3	3	3	3	3	3	3	3	3	3	3	3	3	3	3	3	2
SSCAFFOLD00001_7224649	3	3	3	3	3	3	3	3	3	3	3	2	3	3	3	3	3	2	3	3	2
SSCAFFOLD00001_7224690	3	2	3	2	2	3	3	2	2	3	3	2	2	3	2	3	3	2	2	3	2
SSCAFFOLD00001_7226296	3	3	3	3	3	3	3	3	3	3	3	3	3	3	3	3	3	3	3	3	3
SSCAFFOLD00001_7229152	3	3	3	3	3	3	3	3	3	3	3	3	3	3	3	3	3	3	3	3	3
SSCAFFOLD00001_7229191	3	2	3	3	3	3	3	3	3	3	3	3	3	3	3	3	3	3	3	3	2
SSCAFFOLD00001_7229194	3	2	3	2	3	2	3	2	3	2	3	2	3	2	3	2	3	3	3	3	2
SSCAFFOLD00001_7229373	3	3	3	3	3	3	3	3	3	3	3	3	3	3	3	3	3	3	3	3	3
SSCAFFOLD00001_7229379	3	3	3	3	3	3	3	3	3	3	3	2	3	3	3	2	3	3	3	2	2
SSCAFFOLD00001_7305886	3	3	3	2	3	3	3	3	3	3	3	3	3	2	3	3	3	2	3	3	2
SSCAFFOLD00001_7305969	3	3	3	3	3	3	3	3	3	3	3	3	3	3	3	3	3	3	3	3	3
SSCAFFOLD00001_7305971	3	3	3	3	3	3	3	3	3	3	3	3	3	3	3	3	3	3	3	3	3
SSCAFFOLD00001_7320520	3	2	3	3	3	3	3	3	3	3	3	2	3	3	3	3	3	3	3	3	2
SSCAFFOLD00001_7320526	3	3	3	3	3	3	3	3	3	3	3	3	3	3	3	3	3	3	3	3	3
SSCAFFOLD00001_7320631	3	3	3	3	3	3	3	3	3	3	3	3	3	3	3	3	3	3	3	3	3
SSCAFFOLD00001_7345856	3	3	3	3	3	3	3	3	3	3	3	3	3	3	3	3	3	3	3	3	3
SSCAFFOLD00001_7345864	3	3	3	3	3	3	3	3	3	3	3	3	3	3	3	3	3	3	3	3	3
SSCAFFOLD00001_7350306	3	2	3	3	3	2	3	2	3	2	3	2	3	3	3	2	3	2	3	2	2
SSCAFFOLD00001_7356634	3	3	3	2	3	3	3	3	3	2	3	3	3	2	3	3	3	2	3	3	2
SSCAFFOLD00001_7356638	3	3	3	3	3	3	3	3	3	3	3	3	3	3	3	3	3	3	3	3	3
SSCAFFOLD00001_7356908	3	2	3	2	3	2	3	2	3	2	3	2	3	2	3	2	3	2	2	3	2
SSCAFFOLD00001_7356935	3	2	3	3	3	3	3	3	3	2	3	2	3	3	3	3	3	2	3	2	2
SSCAFFOLD00001_7357436	3	3	3	3	3	3	3	3	3	3	3	3	3	3	3	2	3	3	3	3	2
SSCAFFOLD00001_7367416	3	3	3	3	3	3	3	3	3	3	3	3	3	3	3	3	3	3	3	3	3
SSCAFFOLD00001_7367507	3	3	3	2	3	2	3	2	3	2	3	2	3	3	3	2	3	2	3	3	2
SSCAFFOLD00001_7367519	3	3	3	2	3	2	3	2	3	2	3	2	3	3	3	2	3	2	3	3	2
SSCAFFOLD00001_7367598	3	3	3	3	3	3	3	3	3	3	3	3	3	3	3	2	3	3	3	3	2
SSCAFFOLD00001_7367611	3	3	3	3	3	3	3	3	3	3	3	3	3	3	3	2	3	3	3	3	2
SSCAFFOLD00001_7378357	3	3	3	3	3	2	3	2	3	2	3	3	3	3	3	2	3	3	3	2	2
SSCAFFOLD00001_7378390	3	2	3	3	3	3	3	2	3	3	3	2	3	2	3	3	3	3	3	2	2
SSCAFFOLD00001_7402362	3	3	3	3	3	3	3	3	3	3	3	3	3	3	3	2	3	3	3	3	2
SSCAFFOLD00001_7402388	3	3	3	3	3	3	3	3	3	3	3	3	3	3	3	2	3	3	3	3	2
SSCAFFOLD00001_7402392	3	3	3	2	3	3	3	3	3	3	3	3	3	3	3	3	3	3	3	3	2
SSCAFFOLD00001_7431150	3	3	3	2	3	2	3	3	3	2	3	3	3	2	3	3	3	2	3	3	2
SSCAFFOLD00001_7450160	3	2	3	2	3	2	3	2	3	2	3	2	3	2	3	2	3	2	3	2	2
SSCAFFOLD00001_7451133	3	2	3	3	3	2	2	3	3	3	3	2	3	3	3	2	3	3	3	2	2
SSCAFFOLD00001_7451145	3	2	3	2	3	2	3	2	3	2	3	2	3	2	3	2	3	2	2	3	2
SSCAFFOLD00001_7451207	3	2	3	3	3	2	3	2	3	2	3	2	3	2	3	2	3	2	2	3	2
SSCAFFOLD00001_7510234	3	3	3	3	3	3	3	3	3	3	3	3	3	3	3	3	3	3	3	3	3
SSCAFFOLD00001_7510249	3	3	3	3	3	2	3	2	3	3	3	2	3	3	3	3	3	3	3	3	2
SSCAFFOLD00001_7532143	3	3	3	3	3	3	3	3	3	3	3	3	3	3	3	3	3	3	3	3	3
SSCAFFOLD00001_7544255	3	3	3	3	3	3	3	3	3	3	3	3	3	3	3	3	3	3	3	3	3
SSCAFFOLD00001_7557602	3	3	3	3	3	3	3	3	3	3	3	3	3	3	3	3	3	3	3	3	3
SSCAFFOLD00001_7557661	3	3	3	3	3	3	3	3	3	3	3	3	3	3	3	3	3	3	3	3	3
SSCAFFOLD00001_7557692	3	3	3	2	3	2	2	3	3	2	3	3	3	2	2	3	3	3	3	3	2
SSCAFFOLD00001_7575447	3	3	3	3	3	2	3	3	3	3	3	3	3	3	3	2	3	3	3	3	2
SSCAFFOLD00001_7633462	3	3	3	3	3	3	3	3	3	3	3	3	3	3	3	3	3	3	3	3	3
SSCAFFOLD00001_7633466	3	3	3	3	3	3	3	3	3	3	3	3	3	3	3	3	3	3	3	3	3
SSCAFFOLD00001_7633467	3	3	3	3	3	3	3	3	3	3	3	3	3	3	3	3	3	3	3	3	3
SSCAFFOLD00001_7663138	3	3	3	2	3	3	3	3	3	3	3	3	3	3	3	3	3	3	3	3	2
SSCAFFOLD00001_7667594	3	3	3	2	3	2	3	3	3	3	3	3	3	3	3	3	3	3	3	3	2
SSCAFFOLD00001_7667624	3	3	3	3	3	3	3	3	3	3	3	3	3	3	3	3	3	3	3	3	3
SSCAFFOLD00001_7671219	3	3	3	2	3	2	3	2	3	3	3	3	3	3	3	3	3	3	3	2	2
SSCAFFOLD00001_7711495	3	3	3	2	3	2	3	3	3	2	3	3	3	3	3	3	3	3	3	3	2
SSCAFFOLD00001_7731117	3	2	3	2	3	2	3	3	3	3	3	2	3	3	3	2	3	3	3	3	2
SSCAFFOLD00001_7731847	3	2	3	2	2	3	3	2	3	2	3	2	2	3	3	2	2	3	3	2	2
SSCAFFOLD00001_7735998	2	3	3	2	3	3	2	3	3	3	2	3	3	2	2	3	3	2	2	3	2
SSCAFFOLD00001_7736002	2	2	2	2	2	2	2	2	2	2	2	2	2	2	2	2	2	2	2	2	2
SSCAFFOLD00001_7803199	3	3	3	2	3	3	3	2	3	3	3	3	3	3	3	2	3	3	3	3	2
SSCAFFOLD00001_7803223	3	3	3	2	3	3	3	2	3	3	3	3	3	3	3	2	3	3	3	3	2
SSCAFFOLD00001_7813720	2	2	2	2	2	2	2	2	2	2	2	2	2	2	2	2	2	2	2	2	2
SSCAFFOLD00001_7824902	2	3	3	2	3	2	3	2	3	2	3	2	3	2	2	3	3	2	3	2	2
SSCAFFOLD00001_7852334	3	2	3	2	3	3	3	2	3	3	3	3	3	2	3	3	3	3	3	3	2
SSCAFFOLD00001_7876493	3	3	3	2	3	3	3	3	3	3	3	3	3	3	3	3	3	3	3	3	2
SSCAFFOLD00001_7881662	2	3	3	3	3	3	3	3	2	3	2	3	3	2	3	3	3	3	3	2	2
SSCAFFOLD00001_7905889	3	3	3	3	3	3	3	3	3	3	3	3	3	3	3	3	3	3	3	3	3
SSCAFFOLD00001_7905943	3	3	3	3	3	3	3	3	3	3	3	3	3	3	3	3	3	3	3	3	3
SSCAFFOLD00001_7906046	3	3	3	3	3	3	3	3	3	3	3	3	3	3	3	3	3	2	3	3	2
SSCAFFOLD00001_8000965	3	3	3	3	3	3	3	3	3	3	3	3	3	3	3	3	3	3	3	3	3
SSCAFFOLD00001_8001002	3	3	3	3	3	3	3	3	3	3	3	3	3	3	3	3	3	3	3	3	3
SSCAFFOLD00001_8040134	3	3	3	3	3	3	3	3	3	3	3	2	3	2	3	3	2	3	3	2	2
SSCAFFOLD00001_8070287	3	3	3	3	3	3	3	3	3	3	3	3	3	2	3	3	3	3	3	3	2
SSCAFFOLD00001_8087010	3	3	3	3	3	3	3	3	3	3	3	3	3	3	3	3	3	3	3	3	3
SSCAFFOLD00001_8108825	3	2	3	3	3	3	3	2	3	2	3	2	3	3	3	2	3	3	3	3	2
SSCAFFOLD00001_8131427	3	3	3	3	3	3	3	3	3	3	3	3	3	3	3	3	3	3	3	3	3
SSCAFFOLD00001_8131430	3	3	3	3	3	3	3	3	3	2	3	3	3	3	3	3	3	3	3	2	2
SSCAFFOLD00001_8160923	3	3	3	3	3	3	3	3	3	3	3	3	3	3	3	3	3	3	3	3	3
SSCAFFOLD00001_8160976	3	2	3	2	3	3	3	3	3	3	3	2	3	3	3	2	3	3	3	3	2
SSCAFFOLD00001_8160984	3	2	3	3	3	3	3	3	3	3	3	2	3	3	3	3	3	3	3	3	2
SSCAFFOLD00001_8160992	3	3	3	3	3	3	3	3	3	3	3	3	3	3	3	3	3	3	3	3	3
SSCAFFOLD00001_8194828	2	2	2	2	2	2	2	2	2	2	2	2	2	2	2	2	2	2	2	2	2
SSCAFFOLD00001_8195116	3	3	3	3	3	3	3	3	3	3	3	3	3	3	3	3	3	3	3	3	3
SSCAFFOLD00001_8216674	3	3	3	3	3	3	3	2	3	3	3	3	3	2	3	2	3	2	3	3	2
SSCAFFOLD00001_8242047	3	2	3	3	3	3	3	3	3	3	3	3	3	3	3	3	3	3	3	3	2
SSCAFFOLD00001_8242118	3	2	3	3	3	2	3	3	3	2	3	2	3	3	3	3	3	3	3	3	2
SSCAFFOLD00001_8242158	3	2	3	3	3	3	3	3	3	3	3	3	3	3	3	3	3	3	3	3	2
SSCAFFOLD00001_8328761	3	2	3	2	3	2	3	2	3	2	3	2	3	2	3	2	3	2	3	2	2
SSCAFFOLD00001_8334934	3	3	3	3	3	3	3	3	3	3	3	3	3	3	3	3	3	3	3	3	3
SSCAFFOLD00001_8334964	3	3	3	3	3	3	3	3	3	3	3	3	3	3	3	3	3	3	3	3	3
SSCAFFOLD00001_8343943	3	3	3	3	3	3	3	3	3	3	3	3	3	3	3	3	3	3	3	3	3
SSCAFFOLD00001_8344033	3	3	3	3	3	3	3	3	3	3	3	3	3	3	3	3	3	3	3	3	3
SSCAFFOLD00001_8354026	3	2	3	2	3	2	3	3	3	2	3	2	3	2	3	2	3	2	3	2	2
SSCAFFOLD00001_8367140	3	3	3	3	3	3	3	3	3	3	3	3	3	3	3	3	3	3	3	3	3
SSCAFFOLD00001_8401117	3	2	3	3	3	3	3	2	3	2	3	2	3	2	3	2	3	2	3	3	2
SSCAFFOLD00001_8401122	3	2	3	3	3	3	3	3	3	3	3	2	3	3	3	3	3	3	3	3	2
SSCAFFOLD00001_8403547	3	3	3	3	3	2	3	3	2	3	3	2	3	2	3	3	3	3	3	3	2
SSCAFFOLD00001_8416283	3	3	3	2	3	2	3	2	3	2	3	3	3	3	3	2	3	2	3	2	2
SSCAFFOLD00001_8416289	2	2	2	2	2	2	2	2	2	2	2	2	2	2	2	2	2	2	2	2	2
SSCAFFOLD00001_8462586	2	2	2	2	2	2	2	2	2	2	2	2	2	2	2	2	2	2	2	2	2
SSCAFFOLD00001_8462653	3	2	2	3	3	2	2	3	3	2	2	3	3	2	3	2	3	2	3	2	2
SSCAFFOLD00001_8521403	2	2	2	2	2	2	2	2	2	2	2	2	2	2	2	2	2	2	2	2	2
SSCAFFOLD00001_8544761	3	3	3	3	3	3	3	3	3	3	3	3	3	3	3	3	3	3	3	3	3
SSCAFFOLD00001_8544765	2	3	3	2	2	3	3	2	2	3	3	2	3	2	3	2	3	2	3	2	2
SSCAFFOLD00001_8552415	3	3	3	3	3	3	3	3	3	3	3	3	3	3	3	3	3	3	3	3	3
SSCAFFOLD00001_8552421	3	3	3	3	3	3	3	2	3	3	3	2	3	3	3	3	3	3	3	3	2
SSCAFFOLD00001_8552457	3	3	3	3	3	3	3	3	3	3	3	3	3	3	3	3	3	3	3	3	3
SSCAFFOLD00001_8552471	3	3	3	3	3	3	3	2	3	3	3	2	3	2	3	2	3	2	3	2	2
SSCAFFOLD00001_8552576	3	3	3	3	3	3	3	2	3	3	3	2	3	3	3	3	3	3	3	3	2
SSCAFFOLD00001_8552588	3	2	3	3	3	3	3	3	3	3	3	3	3	3	3	3	3	3	3	3	2
SSCAFFOLD00001_8552650	3	3	3	3	3	3	3	3	3	3	3	3	3	3	3	3	3	3	3	3	3
SSCAFFOLD00001_8563551	2	2	2	2	2	2	2	2	2	2	2	2	2	2	2	2	2	2	2	2	2
SSCAFFOLD00001_8568458	3	3	3	2	3	3	3	3	3	3	3	3	3	3	3	3	3	3	3	3	2
SSCAFFOLD00001_8571142	3	3	3	2	3	3	3	2	3	2	3	2	3	2	3	3	3	3	3	2	2
SSCAFFOLD00001_8583574	2	3	3	2	3	2	3	3	2	3	3	2	3	2	3	2	3	2	3	2	2
SSCAFFOLD00001_8681096	3	3	3	3	3	3	3	3	3	3	3	2	3	3	3	3	3	3	3	3	2
SSCAFFOLD00001_8691233	3	2	2	3	3	2	3	2	3	2	3	2	3	2	3	2	3	2	3	2	2
SSCAFFOLD00001_8695117	3	3	3	3	3	3	3	3	3	3	3	3	3	3	3	3	3	3	3	3	3
SSCAFFOLD00001_8710896	2	2	2	2	2	2	2	2	2	2	2	2	2	2	2	2	2	2	2	2	2
SSCAFFOLD00001_8719927	3	3	3	3	3	3	3	3	3	3	3	3	3	3	3	3	3	3	3	3	3
SSCAFFOLD00001_8726022	3	3	3	3	3	3	3	3	3	3	3	3	3	3	3	3	3	3	3	3	3
SSCAFFOLD00001_8733756	3	3	3	3	3	3	3	3	3	3	3	3	3	3	3	3	3	3	3	3	3
SSCAFFOLD00001_8733975	3	3	3	3	3	3	3	3	3	3	3	3	3	3	3	3	3	2	3	3	2
SSCAFFOLD00001_8734211	3	3	3	3	3	3	3	3	3	2	3	3	3	2	3	3	3	3	3	3	2
SSCAFFOLD00001_8734314	3	2	3	2	2	3	3	2	2	3	3	2	2	3	2	3	3	2	2	3	2
SSCAFFOLD00001_8785210	3	2	3	2	3	2	3	3	3	3	3	3	3	3	3	3	3	3	3	3	2
SSCAFFOLD00001_8796478	3	3	3	3	3	3	3	3	3	2	3	3	3	3	3	3	3	3	3	3	2
SSCAFFOLD00001_8796502	3	3	3	3	3	3	3	3	3	3	3	3	3	3	3	3	3	3	3	3	3
SSCAFFOLD00001_8885281	3	3	3	3	3	3	3	3	3	3	3	3	3	3	3	3	3	3	3	3	3
SSCAFFOLD00001_8921930	2	2	2	2	2	2	2	2	2	2	2	2	2	2	2	2	2	2	2	2	2
SSCAFFOLD00001_8921958	3	3	3	2	3	3	3	3	3	2	3	3	3	3	3	3	3	3	3	3	2
SSCAFFOLD00001_8921960	3	3	3	3	3	3	3	3	3	3	3	3	3	3	3	3	3	3	3	3	3
SSCAFFOLD00001_8922002	3	3	3	3	3	3	3	3	3	3	3	3	3	3	3	3	3	3	3	3	3
SSCAFFOLD00001_8922089	3	2	3	2	3	2	3	2	3	3	3	3	3	2	3	2	3	2	3	2	2
SSCAFFOLD00001_8922192	2	2	2	2	2	2	2	2	2	2	2	2	2	2	2	2	2	2	2	2	2
SSCAFFOLD00001_8922213	2	2	2	2	2	2	2	2	2	2	2	2	2	2	2	2	2	2	2	2	2
SSCAFFOLD00001_8976158	3	3	3	3	3	3	3	3	3	3	3	3	3	3	3	3	3	3	3	3	3
SSCAFFOLD00001_8976161	3	3	3	3	3	3	3	3	3	3	3	3	3	3	3	3	3	3	3	3	3
SSCAFFOLD00001_8988701	3	3	3	3	3	3	3	3	3	3	3	3	3	3	3	3	3	3	3	3	3
SSCAFFOLD00001_9006658	3	2	2	3	3	2	3	2	3	2	3	2	2	3	3	2	3	2	2	3	2
SSCAFFOLD00001_9006683	3	2	3	3	3	3	3	3	3	3	3	3	3	3	3	3	3	3	3	3	2
SSCAFFOLD00001_9011563	3	3	3	3	3	3	3	2	3	3	3	3	3	3	3	3	3	3	3	3	2
SSCAFFOLD00001_9011664	3	3	3	3	3	2	3	3	3	3	3	3	2	3	3	3	3	3	3	3	2
SSCAFFOLD00001_9013042	3	3	3	3	3	3	3	3	3	3	3	3	3	3	3	3	3	3	3	3	3
SSCAFFOLD00001_9013106	3	3	3	3	3	3	3	3	3	3	3	3	3	3	3	2	3	3	3	3	2
SSCAFFOLD00001_9013247	3	3	3	3	3	3	3	3	3	3	3	3	3	3	3	3	3	3	3	3	3
SSCAFFOLD00001_9045993	3	2	3	2	3	2	3	2	3	2	3	2	3	2	3	2	3	2	2	3	2
SSCAFFOLD00001_9088137	3	3	3	3	3	3	3	3	3	3	3	3	3	3	3	3	3	3	3	3	3
SSCAFFOLD00001_9088138	3	3	3	3	3	3	3	3	3	3	3	3	3	3	3	3	3	3	3	3	3
SSCAFFOLD00001_9088139	3	2	3	3	3	3	3	3	3	3	3	2	3	3	3	3	3	3	3	3	2
SSCAFFOLD00001_9149167	3	3	3	3	3	3	3	3	3	3	3	3	3	3	3	3	3	3	3	3	3
SSCAFFOLD00001_9149192	3	3	3	2	3	3	3	3	3	3	3	3	3	3	3	3	3	3	3	3	2
SSCAFFOLD00001_9233246	3	3	3	3	3	3	3	3	3	3	3	2	3	3	3	3	3	3	3	2	2
SSCAFFOLD00001_9235037	3	2	3	3	3	3	3	3	3	3	3	3	3	3	3	3	3	3	3	3	2
SSCAFFOLD00001_9319420	3	2	3	3	3	3	3	3	3	3	3	2	3	3	3	3	3	3	3	3	2
SSCAFFOLD00001_9319436	3	2	3	2	3	2	3	3	3	3	3	3	3	2	3	2	3	2	3	2	2
SSCAFFOLD00001_9319451	3	3	3	3	3	3	3	3	3	3	3	2	3	3	3	3	3	3	3	3	2
SSCAFFOLD00001_9319454	2	3	3	3	3	3	3	3	3	3	3	3	3	3	3	3	3	3	3	3	2
SSCAFFOLD00001_9320346	3	2	3	3	3	3	3	2	3	3	3	3	3	2	3	3	3	2	3	2	2
SSCAFFOLD00001_9322064	3	3	3	3	3	3	3	3	3	3	3	3	3	3	3	3	3	3	3	3	3
SSCAFFOLD00001_9322081	3	3	3	3	3	3	3	3	3	3	3	3	3	3	3	3	3	3	3	3	3
SSCAFFOLD00001_9324134	3	2	3	3	3	2	3	3	3	2	2	3	3	2	3	3	3	2	3	3	2
SSCAFFOLD00001_9341879	3	3	3	3	3	3	3	3	3	3	3	3	3	3	3	3	3	3	3	3	3
SSCAFFOLD00001_9380372	3	2	3	2	3	3	3	2	3	3	3	3	3	2	3	2	3	2	3	2	2
SSCAFFOLD00001_9380382	3	3	3	3	3	3	3	3	3	3	3	3	3	3	3	3	3	3	3	3	3
SSCAFFOLD00001_9380383	3	2	3	2	3	2	3	2	3	2	2	3	3	2	2	3	3	2	2	3	2
SSCAFFOLD00001_9384057	3	2	3	3	3	2	3	2	3	2	2	3	3	2	3	3	3	2	2	3	2
SSCAFFOLD00001_9384063	3	2	3	3	3	2	3	2	3	2	2	3	3	2	3	3	3	2	2	3	2
SSCAFFOLD00001_9384143	2	3	3	2	3	2	3	2	2	3	3	2	2	3	3	2	2	3	2	3	2
SSCAFFOLD00001_9390907	3	3	3	3	3	3	3	3	3	3	3	3	3	3	3	3	3	3	3	3	3
SSCAFFOLD00001_9407336	3	3	3	3	3	3	3	3	3	3	3	3	3	2	3	3	3	3	3	2	2
SSCAFFOLD00001_9415091	3	3	3	3	3	3	3	3	3	3	3	3	3	3	3	3	3	3	3	3	3
SSCAFFOLD00001_9415133	3	3	3	3	3	3	3	3	3	3	3	2	3	3	3	2	3	3	3	3	2
SSCAFFOLD00001_9415148	3	3	3	3	3	3	3	3	3	3	3	3	3	3	3	3	3	3	3	3	3
SSCAFFOLD00001_9415188	3	3	3	3	3	3	2	3	3	2	3	2	3	3	3	2	3	2	3	3	2
SSCAFFOLD00001_9415197	3	3	3	3	3	3	3	3	3	3	3	3	3	3	3	3	3	3	3	3	3
SSCAFFOLD00001_9415383	3	2	2	3	3	2	3	2	2	3	2	3	3	2	2	3	3	2	2	3	2
SSCAFFOLD00001_9428816	3	3	3	3	3	3	3	3	3	3	3	3	3	3	3	3	3	3	3	3	3
SSCAFFOLD00001_9522760	2	2	2	2	2	2	2	2	2	2	2	2	2	2	2	2	2	2	2	2	2
SSCAFFOLD00001_9572220	3	3	3	3	3	3	3	3	3	3	3	3	3	3	3	3	3	3	3	3	3
SSCAFFOLD00001_9833919	3	3	3	3	3	3	3	3	3	3	3	3	3	3	3	3	3	3	3	3	3
SSCAFFOLD00001_9858247	3	2	3	2	3	3	3	3	3	3	3	2	3	2	2	3	3	2	3	2	2
SSCAFFOLD00001_9862350	3	2	3	2	3	2	3	3	3	2	3	2	3	2	3	2	3	3	3	2	2
SSCAFFOLD00001_9862366	3	2	3	2	3	2	3	2	2	3	3	2	3	2	3	2	3	2	3	2	2
SSCAFFOLD00001_9865619	3	3	3	3	3	3	3	2	3	3	3	2	3	3	3	3	3	3	3	3	2
SSCAFFOLD00001_9865690	3	3	3	3	3	3	3	3	3	3	3	3	3	3	3	3	3	3	3	3	3
SSCAFFOLD00001_9865692	3	2	3	2	3	2	3	3	3	2	3	2	3	2	3	2	3	3	3	2	2
SSCAFFOLD00001_9930026	2	2	2	2	2	2	2	2	2	2	2	2	2	2	2	2	2	2	2	2	2
SSCAFFOLD00001_9958041	2	2	2	2	2	2	2	2	2	2	2	2	2	2	2	2	2	2	2	2	2
SSCAFFOLD00001_9983994	3	3	3	3	3	3	3	3	3	3	3	3	3	3	3	3	3	3	3	3	3
SSCAFFOLD00001_9984003	3	3	3	3	3	3	3	3	3	3	3	3	3	3	3	3	3	3	3	3	3
SSCAFFOLD00001_9985916	2	2	2	2	2	2	2	2	2	2	2	2	2	1	2	2	2	2	2	2	1
SSCAFFOLD00001_9985966	3	3	3	3	3	3	3	3	3	3	3	3	3	3	3	3	3	3	3	3	3
SSCAFFOLD00001_9986024	3	3	3	3	3	3	3	3	3	3	3	3	3	3	3	3	3	3	3	3	3
SSCAFFOLD00001_9986037	3	2	3	2	3	3	3	3	3	3	3	2	3	3	3	3	3	3	3	2	2
SSCAFFOLD00001_9986155	3	3	3	3	3	3	3	3	3	3	3	3	3	3	3	3	3	3	3	3	3
SSCAFFOLD00001_9988318	2	3	2	3	2	3	3	2	3	2	3	2	3	2	3	2	3	2	3	2	2
SSCAFFOLD00001_9988329	3	3	3	3	3	3	3	3	3	3	3	3	3	3	3	3	3	3	3	3	3
SSCAFFOLD00001_9988335	3	3	3	3	3	3	3	3	3	3	3	3	3	3	3	3	3	3	3	3	3
SSCAFFOLD00001_9988341	3	3	3	3	3	3	3	3	3	3	3	3	3	3	3	3	3	3	3	3	3
SSCAFFOLD00001_9988397	3	3	3	3	3	3	3	3	3	3	3	3	3	3	3	3	3	3	3	3	3
SSCAFFOLD00001_10013481	3	3	3	3	3	2	3	3	3	3	3	3	3	3	3	2	3	3	3	3	2
SSCAFFOLD00001_10061115	3	3	3	2	3	2	3	3	3	3	3	3	3	3	3	3	3	3	3	3	2
SSCAFFOLD00001_10077349	3	3	3	2	3	2	3	2	3	3	3	2	3	3	3	2	3	2	3	2	2
SSCAFFOLD00001_10077386	3	3	3	2	3	3	3	3	3	3	3	3	3	3	3	3	3	3	3	3	2
SSCAFFOLD00001_10077949	3	3	3	2	3	3	3	3	3	3	3	3	3	3	3	3	3	3	3	3	2
SSCAFFOLD00001_10078671	3	3	3	3	3	3	3	3	3	3	3	3	3	3	3	3	3	3	3	3	3
SSCAFFOLD00001_10078771	3	3	3	3	3	3	3	3	3	3	3	3	3	2	3	3	3	3	3	3	2
SSCAFFOLD00001_10078791	3	3	3	3	3	3	3	3	3	3	3	3	3	3	3	3	3	3	3	3	3
SSCAFFOLD00001_10078925	3	2	3	2	3	3	3	3	3	3	3	3	3	2	3	3	3	3	3	2	2
SSCAFFOLD00001_10082275	3	3	3	3	3	3	3	3	3	3	3	3	3	3	3	3	3	3	3	3	3
SSCAFFOLD00001_10110690	3	3	3	3	3	3	3	3	3	3	3	3	3	3	3	3	3	3	3	3	3
SSCAFFOLD00001_10120654	3	2	3	2	3	2	3	2	3	2	3	2	2	3	3	2	3	2	2	3	2
SSCAFFOLD00001_10171059	3	3	3	2	3	3	3	3	3	2	3	3	3	3	3	3	3	3	3	3	2
SSCAFFOLD00001_10179606	3	2	3	2	3	2	3	2	3	3	2	3	3	3	3	2	3	3	3	3	2
SSCAFFOLD00001_10190501	3	2	3	2	3	3	3	3	3	3	3	2	3	2	2	3	3	2	3	2	2
SSCAFFOLD00001_10194214	2	2	2	2	2	2	2	2	2	2	2	2	2	2	2	2	2	2	2	2	2
SSCAFFOLD00001_10197391	3	3	3	3	3	3	3	3	3	3	3	3	3	3	3	3	3	3	3	3	3
SSCAFFOLD00001_10221839	3	3	3	3	3	3	3	3	3	3	3	3	3	3	3	3	3	3	3	3	3
SSCAFFOLD00001_10229911	3	2	3	2	3	3	3	2	3	3	3	3	3	3	3	3	3	2	3	3	2
SSCAFFOLD00001_10230043	3	3	3	3	3	3	3	3	3	3	3	3	3	3	3	3	3	3	3	3	3
SSCAFFOLD00001_10230055	3	3	3	3	3	3	3	3	3	3	3	3	3	3	3	3	3	3	3	3	3
SSCAFFOLD00001_10230056	3	2	3	3	3	3	3	3	3	3	3	3	3	3	3	3	3	3	3	3	2
SSCAFFOLD00001_10231325	3	3	3	3	3	3	3	3	3	3	3	3	3	3	3	3	3	3	3	3	3
SSCAFFOLD00001_10343489	3	3	3	3	3	3	3	3	3	3	3	3	3	2	3	3	3	3	3	2	2
SSCAFFOLD00001_10343509	3	3	3	3	3	3	3	3	3	3	3	3	3	3	3	3	3	3	3	3	3
SSCAFFOLD00001_10343520	3	2	3	2	3	2	3	2	2	3	3	2	3	2	3	2	3	2	3	2	2
SSCAFFOLD00001_10343522	2	2	2	2	2	2	2	2	2	2	2	2	2	2	2	2	2	2	2	2	2
SSCAFFOLD00001_10343687	3	3	3	3	3	3	3	3	3	3	3	3	3	3	3	3	3	3	3	3	3
SSCAFFOLD00001_10343697	3	3	3	3	3	2	3	3	3	3	3	3	3	3	3	3	3	3	3	3	2
SSCAFFOLD00001_10343781	3	3	3	3	3	3	3	3	3	2	3	3	3	3	3	3	3	3	3	3	2
SSCAFFOLD00001_10403212	3	3	3	2	3	2	3	2	2	3	3	2	3	2	3	3	3	2	3	2	2
SSCAFFOLD00001_10461265	3	3	3	3	2	3	3	3	3	2	3	2	3	3	3	3	3	2	3	2	2
SSCAFFOLD00001_10461278	3	3	3	3	3	3	3	3	3	3	3	3	3	3	3	3	3	3	3	3	3
SSCAFFOLD00001_10461282	2	3	3	2	3	2	2	3	3	2	3	2	3	2	3	2	2	3	2	3	2
SSCAFFOLD00001_10461298	3	3	3	3	3	3	3	3	3	3	3	3	3	3	3	3	3	3	3	3	3
SSCAFFOLD00001_10461304	3	3	3	3	3	3	3	3	3	3	3	3	3	3	3	3	3	3	3	3	3
SSCAFFOLD00001_10607856	2	2	2	2	2	2	2	2	2	2	2	2	2	2	2	2	2	2	2	2	2
SSCAFFOLD00001_10644298	2	2	2	2	2	2	2	2	2	2	2	2	2	2	2	2	2	2	2	2	2
SSCAFFOLD00001_10644313	3	3	3	3	3	3	3	3	3	3	3	3	3	3	3	3	3	3	3	3	3
SSCAFFOLD00001_10644322	3	3	3	3	3	3	3	3	3	3	3	3	3	3	3	3	3	3	3	3	3
SSCAFFOLD00001_10644336	2	2	2	2	2	2	2	2	2	2	2	2	2	2	2	2	2	2	2	2	2
SSCAFFOLD00001_10645067	2	2	2	2	2	2	2	2	2	2	2	2	2	2	2	2	2	2	2	2	2
SSCAFFOLD00001_10645160	3	3	3	3	3	3	3	3	3	3	3	3	3	3	3	3	3	3	3	3	3
SSCAFFOLD00001_10785481	3	2	3	3	3	3	3	2	3	3	3	3	3	3	3	3	3	2	3	3	2
SSCAFFOLD00001_10785559	2	2	2	2	2	2	2	2	2	2	2	2	2	2	2	2	2	2	2	2	2
SSCAFFOLD00002_78899	3	3	3	3	2	3	3	3	3	3	3	3	3	3	3	2	3	3	3	3	2
SSCAFFOLD00002_145941	3	3	3	3	3	3	3	3	3	3	3	3	3	3	3	3	3	3	3	3	3
SSCAFFOLD00002_247608	2	2	2	2	2	2	2	2	2	2	2	2	2	2	2	2	2	2	2	2	2
SSCAFFOLD00002_255795	3	3	3	3	3	3	3	3	3	3	3	3	3	3	3	3	3	3	3	3	3
SSCAFFOLD00002_334070	3	2	3	3	3	3	3	3	3	2	3	3	3	3	3	3	3	3	3	2	2
SSCAFFOLD00002_334866	3	3	3	3	3	2	3	3	3	3	3	3	3	3	3	3	3	3	3	3	2
SSCAFFOLD00002_335028	3	3	3	3	3	3	3	3	3	3	3	3	3	3	3	3	3	3	3	3	3
SSCAFFOLD00002_375917	3	3	3	3	3	3	3	3	3	3	3	3	3	3	3	3	3	3	3	3	3
SSCAFFOLD00002_375934	3	3	3	3	3	3	3	3	3	3	3	3	3	3	3	3	3	3	3	3	3
SSCAFFOLD00002_420355	3	3	3	3	3	3	3	3	3	3	3	3	3	3	3	3	3	3	3	3	3
SSCAFFOLD00002_420371	3	3	3	3	3	3	3	3	3	3	3	3	3	3	3	3	3	3	3	3	3
SSCAFFOLD00002_420388	3	3	3	3	3	3	3	3	3	3	3	3	3	3	3	3	3	3	3	3	3
SSCAFFOLD00002_420392	3	3	3	3	3	3	3	3	3	3	3	3	3	3	3	3	3	3	3	3	3
SSCAFFOLD00002_420432	3	3	3	2	3	2	3	3	3	3	3	3	3	3	3	3	3	3	3	3	2
SSCAFFOLD00002_420441	3	3	3	3	3	2	3	3	3	3	3	3	3	3	3	3	3	2	3	3	2
SSCAFFOLD00002_420514	3	3	3	3	3	3	3	3	3	3	3	3	3	3	3	3	3	3	3	3	3
SSCAFFOLD00002_420549	3	3	3	2	3	3	3	3	3	3	3	3	3	3	3	3	3	3	3	3	2
SSCAFFOLD00002_420612	3	3	3	3	3	3	3	3	3	3	3	3	3	3	3	3	3	3	3	3	3
SSCAFFOLD00002_420627	3	3	3	3	3	3	3	3	3	3	3	3	3	3	3	3	3	3	3	3	3
SSCAFFOLD00002_420631	3	3	3	2	3	2	3	3	3	3	3	3	3	3	3	3	3	3	3	3	2
SSCAFFOLD00002_426283	3	3	3	3	3	3	3	3	3	2	3	3	3	3	3	3	3	3	3	3	2
SSCAFFOLD00002_497651	3	3	3	3	3	3	3	3	3	2	3	3	3	3	3	3	3	3	3	3	2
SSCAFFOLD00002_500708	3	3	3	2	3	2	3	3	3	3	3	3	3	3	3	2	3	2	3	2	2
SSCAFFOLD00002_500769	3	3	3	3	3	3	3	3	3	3	3	3	3	3	3	3	3	3	3	3	3
SSCAFFOLD00002_500789	3	3	3	3	3	3	3	3	3	3	3	3	3	3	3	3	3	3	3	3	3
SSCAFFOLD00002_500817	3	3	3	3	3	3	3	3	3	3	3	3	3	3	3	3	3	3	3	3	3
SSCAFFOLD00002_500819	3	3	3	3	3	3	3	3	3	3	3	3	3	3	3	3	3	3	3	3	3
SSCAFFOLD00002_560334	3	3	3	3	3	2	3	2	3	3	3	3	3	3	3	3	3	2	3	3	2
SSCAFFOLD00002_573211	3	3	3	3	3	3	3	3	3	3	3	3	3	3	3	3	3	3	3	3	3
SSCAFFOLD00002_584427	3	3	3	3	3	3	3	3	3	3	3	3	3	3	3	3	3	3	3	3	3
SSCAFFOLD00002_586642	3	3	3	3	3	3	3	3	3	2	3	3	3	3	3	3	3	3	3	2	2
SSCAFFOLD00002_586666	3	3	3	3	3	3	3	3	3	3	3	3	3	3	3	3	3	3	3	3	3
SSCAFFOLD00002_597019	3	2	3	2	3	3	3	2	3	3	3	2	3	2	3	2	3	2	3	3	2
SSCAFFOLD00002_597050	3	3	3	3	3	3	3	3	3	3	3	3	3	3	3	3	3	3	3	3	3
SSCAFFOLD00002_602639	3	3	3	3	3	3	3	3	3	3	3	3	3	3	3	3	3	3	3	3	3
SSCAFFOLD00002_615858	3	2	3	2	3	2	3	2	3	2	3	3	3	3	3	2	3	2	3	3	2
SSCAFFOLD00002_615888	3	2	3	2	3	2	3	2	3	3	3	3	3	2	3	2	3	2	3	3	2
SSCAFFOLD00002_621521	3	3	3	3	3	3	3	3	3	3	3	3	3	3	3	3	3	3	3	3	3
SSCAFFOLD00002_621531	3	2	3	2	2	3	3	2	3	2	3	2	2	3	3	2	2	3	3	2	2
SSCAFFOLD00002_621612	3	3	3	3	3	3	3	3	3	3	3	3	3	3	3	3	3	3	3	3	3
SSCAFFOLD00002_621655	3	2	3	2	2	3	3	2	3	2	3	2	2	3	3	2	2	3	3	2	2
SSCAFFOLD00002_621856	3	2	3	2	3	2	3	2	3	3	3	3	3	2	3	2	3	2	3	2	2
SSCAFFOLD00002_622322	3	3	3	3	3	3	3	3	3	3	3	3	3	3	3	3	3	3	3	3	3
SSCAFFOLD00002_648196	3	3	3	3	3	3	3	3	3	3	3	2	3	3	3	2	3	2	3	2	2
SSCAFFOLD00002_651908	3	3	3	3	3	3	3	3	3	3	3	3	3	3	3	3	3	3	3	3	3
SSCAFFOLD00002_662119	3	2	2	3	3	2	3	2	3	2	2	3	3	2	3	2	3	2	2	3	2
SSCAFFOLD00002_716881	3	3	3	3	3	3	3	3	3	3	3	3	3	3	3	3	3	3	3	3	3
SSCAFFOLD00002_725799	3	3	3	3	3	3	3	3	3	3	3	3	3	2	3	3	3	3	3	3	2
SSCAFFOLD00002_726066	3	3	3	2	3	3	3	3	3	3	3	3	3	3	3	2	3	3	3	3	2
SSCAFFOLD00002_731226	3	3	3	3	3	3	3	3	3	3	3	3	3	2	3	3	3	3	3	3	2
SSCAFFOLD00002_739912	3	3	3	3	3	3	3	3	3	3	3	3	3	3	3	3	3	3	3	3	3
SSCAFFOLD00002_740191	3	2	3	2	3	2	2	3	2	3	3	2	3	2	2	3	2	3	3	2	2
SSCAFFOLD00002_740216	3	2	3	2	2	3	3	2	3	2	3	2	2	3	3	2	2	3	2	3	2
SSCAFFOLD00002_750825	2	3	2	3	3	2	3	2	3	2	3	2	2	3	3	2	3	2	3	2	2
SSCAFFOLD00002_750842	2	3	2	3	3	2	3	2	3	2	3	2	2	3	3	2	3	2	3	2	2
SSCAFFOLD00002_750884	3	3	3	3	3	3	3	3	3	3	3	3	3	3	3	3	3	3	3	3	3
SSCAFFOLD00002_751208	3	3	3	3	3	3	3	3	3	3	3	3	3	3	3	3	3	3	3	3	3
SSCAFFOLD00002_822784	3	3	3	3	3	3	3	3	3	3	3	3	3	3	3	3	3	3	3	3	3
SSCAFFOLD00002_822808	3	3	3	3	3	3	3	3	3	3	3	3	3	3	3	3	3	3	3	3	3
SSCAFFOLD00002_823498	3	2	3	3	3	3	3	3	3	3	3	2	3	3	3	2	3	2	3	3	2
SSCAFFOLD00002_864479	3	3	3	3	3	3	3	3	3	3	3	2	3	3	3	2	3	3	3	2	2
SSCAFFOLD00002_864585	3	2	3	3	3	3	3	3	3	3	3	3	3	3	3	2	3	2	3	3	2
SSCAFFOLD00002_864596	3	3	3	3	3	3	3	3	3	3	3	2	3	3	3	3	3	3	3	3	2
SSCAFFOLD00002_869338	3	3	3	3	3	3	3	3	3	3	3	3	3	3	3	3	3	3	3	3	3
SSCAFFOLD00002_869367	3	3	3	3	3	3	3	3	3	3	3	3	3	3	3	2	3	3	3	3	2
SSCAFFOLD00002_874382	3	3	2	3	3	2	3	2	3	2	3	3	3	3	3	2	3	2	3	3	2
SSCAFFOLD00002_874391	3	3	3	3	3	3	3	3	3	2	3	3	3	3	3	3	3	2	3	3	2
SSCAFFOLD00002_874403	3	3	3	3	3	3	3	3	3	3	3	3	3	3	3	3	3	3	3	3	3
SSCAFFOLD00002_874457	3	3	3	3	3	3	3	3	3	3	3	3	3	3	3	3	3	3	3	3	3
SSCAFFOLD00002_894169	3	3	3	3	3	3	3	3	3	3	3	3	3	3	3	3	3	2	3	3	2
SSCAFFOLD00002_894253	2	2	2	2	2	2	2	2	2	2	2	2	2	2	2	2	2	2	2	2	2
SSCAFFOLD00002_897794	2	2	2	2	2	2	2	2	2	2	2	2	2	2	2	2	2	2	2	2	2
SSCAFFOLD00002_897818	3	3	3	3	3	2	3	2	3	3	3	2	3	3	3	2	3	3	3	3	2
SSCAFFOLD00002_928352	3	3	3	3	3	3	3	2	3	3	3	3	3	3	3	3	3	3	3	3	2
SSCAFFOLD00002_928370	3	3	3	3	3	3	3	2	3	3	3	3	3	3	3	3	3	3	3	3	2
SSCAFFOLD00002_932137	3	3	3	3	3	3	3	3	3	3	3	3	3	2	3	3	3	3	3	3	2
SSCAFFOLD00002_938945	3	3	3	3	3	3	3	3	3	3	3	3	3	3	3	3	3	3	3	3	3
SSCAFFOLD00002_939015	3	3	3	3	3	3	3	3	3	3	3	3	3	3	3	3	3	3	3	3	3
SSCAFFOLD00002_939046	3	3	3	3	3	3	3	3	3	3	3	3	3	3	3	3	3	3	3	3	3
SSCAFFOLD00002_939053	3	3	3	3	3	3	3	3	3	3	3	3	3	3	3	3	3	3	3	3	3
SSCAFFOLD00002_939086	3	2	3	3	3	2	3	2	3	3	3	3	3	3	3	2	3	2	3	2	2
SSCAFFOLD00002_942447	3	2	2	3	3	2	3	2	3	2	3	2	2	3	3	2	3	2	3	2	2
SSCAFFOLD00002_942461	3	2	2	3	3	2	3	2	3	2	3	2	2	3	3	2	3	2	3	2	2
SSCAFFOLD00002_948944	3	3	3	3	3	3	3	3	3	2	3	3	3	3	3	2	3	3	3	3	2
SSCAFFOLD00002_962712	3	3	3	3	3	3	3	3	3	3	3	3	3	3	3	3	3	3	3	3	3
SSCAFFOLD00002_987631	3	3	3	3	3	3	3	3	3	2	3	2	3	3	3	3	3	3	3	3	2
SSCAFFOLD00002_987648	3	3	3	3	3	3	3	3	3	3	3	3	3	3	3	3	3	3	3	3	3
SSCAFFOLD00002_987691	3	3	3	3	3	3	3	3	3	2	3	2	3	3	3	3	3	3	3	3	2
SSCAFFOLD00002_987760	3	3	3	3	3	3	3	3	3	3	3	3	3	3	3	3	3	3	3	3	3
SSCAFFOLD00002_987778	3	3	3	3	3	3	3	3	3	3	3	3	3	3	3	3	3	3	3	3	3
SSCAFFOLD00002_990416	3	3	3	3	3	3	3	3	3	3	3	3	3	3	3	3	3	3	3	3	3
SSCAFFOLD00002_1011717	3	3	3	2	3	3	3	3	3	3	3	2	3	2	3	3	3	3	3	3	2
SSCAFFOLD00002_1013293	3	3	3	3	3	3	3	3	3	3	3	3	3	3	3	3	3	3	3	3	3
SSCAFFOLD00002_1021177	3	2	3	2	2	3	3	2	3	2	3	2	3	2	3	2	3	2	3	2	2
SSCAFFOLD00002_1021183	3	2	3	3	3	3	3	2	3	3	3	3	3	3	3	3	3	3	3	3	2
SSCAFFOLD00002_1076658	3	2	2	3	3	2	3	2	3	2	2	3	3	2	3	2	3	2	2	3	2
SSCAFFOLD00002_1076852	3	2	3	3	3	2	3	2	3	3	3	2	3	2	3	3	3	3	2	3	2
SSCAFFOLD00002_1076908	3	2	3	3	3	2	3	2	3	3	3	2	3	3	3	3	3	3	2	3	2
SSCAFFOLD00002_1076991	3	3	3	2	3	3	3	3	3	3	3	2	3	3	3	3	3	3	3	3	2
SSCAFFOLD00002_1077018	3	3	3	3	3	3	3	3	3	3	3	3	3	3	3	3	3	3	3	3	3
SSCAFFOLD00002_1077042	3	3	3	3	3	2	3	2	3	3	3	2	3	2	3	3	3	3	3	3	2
SSCAFFOLD00002_1077135	3	3	3	3	3	3	3	2	3	3	3	2	3	2	3	3	3	3	3	3	2
SSCAFFOLD00002_1080001	2	3	3	2	3	2	3	2	2	3	3	2	3	2	3	2	3	2	3	2	2
SSCAFFOLD00002_1099324	3	3	3	3	3	3	3	3	3	3	3	2	3	3	3	3	3	3	3	3	2
SSCAFFOLD00002_1099670	3	3	3	3	3	3	3	3	3	3	3	3	3	2	3	3	3	2	3	2	2
SSCAFFOLD00002_1107422	3	2	3	2	3	3	3	2	3	3	2	3	3	2	3	2	3	2	3	2	2
SSCAFFOLD00002_1113006	3	3	3	3	3	3	3	3	3	3	3	3	3	3	3	3	3	3	3	3	3
SSCAFFOLD00002_1113011	3	2	3	3	3	3	3	3	3	2	3	2	3	3	3	3	3	2	3	3	2
SSCAFFOLD00002_1113053	2	2	2	2	2	2	2	2	2	2	2	2	2	2	2	2	2	2	2	2	2
SSCAFFOLD00002_1230337	3	2	3	2	3	2	2	3	3	2	2	3	3	2	3	2	2	3	3	2	2
SSCAFFOLD00002_1233705	3	2	2	3	3	2	3	2	3	2	2	3	3	2	3	2	3	2	2	3	2
SSCAFFOLD00002_1265519	3	3	3	3	3	3	3	3	3	3	3	3	3	3	3	3	3	3	3	3	3
SSCAFFOLD00002_1265524	3	3	3	3	3	3	3	3	3	3	3	3	3	3	3	3	3	3	3	3	3
SSCAFFOLD00002_1332079	3	3	3	3	3	3	3	3	3	3	3	3	3	3	3	3	3	3	3	3	3
SSCAFFOLD00002_1332103	3	3	3	3	3	3	3	3	3	3	3	3	3	3	3	3	3	3	3	3	3
SSCAFFOLD00002_1369236	3	2	3	2	3	2	3	2	3	2	3	2	3	2	2	3	3	2	3	2	2
SSCAFFOLD00002_1369280	3	2	3	2	3	2	3	2	3	2	3	2	3	2	2	3	3	2	3	2	2
SSCAFFOLD00002_1370129	3	3	3	2	3	3	3	2	3	3	3	3	3	3	3	2	3	3	3	3	2
SSCAFFOLD00002_1375974	2	3	3	2	3	2	2	3	3	2	2	3	2	3	2	3	3	2	3	2	2
SSCAFFOLD00002_1393218	3	2	3	2	3	2	2	3	3	2	3	2	3	2	3	2	3	2	2	3	2
SSCAFFOLD00002_1394628	3	3	3	3	3	3	3	3	3	3	3	3	3	3	3	3	3	3	3	3	3
SSCAFFOLD00002_1395794	3	3	3	2	3	3	3	2	3	3	3	3	3	3	3	3	3	3	3	3	2
SSCAFFOLD00002_1395824	3	2	3	3	3	2	2	3	3	2	3	3	3	3	3	3	3	2	3	3	2
SSCAFFOLD00002_1397239	2	2	2	2	2	2	2	2	2	2	2	2	2	2	2	2	2	2	2	2	2
SSCAFFOLD00002_1397278	3	3	3	3	3	3	3	3	3	3	3	3	3	3	3	3	3	3	3	3	3
SSCAFFOLD00002_1433977	3	3	3	3	3	3	3	3	3	3	3	3	3	3	3	3	3	3	3	3	3
SSCAFFOLD00002_1441394	2	2	2	2	2	2	2	2	2	2	2	2	2	2	2	2	2	2	2	2	2
SSCAFFOLD00002_1450556	2	3	3	2	3	2	3	2	3	2	3	2	2	3	3	2	3	2	2	3	2
SSCAFFOLD00002_1456489	3	3	3	3	3	3	3	3	3	3	3	3	3	3	3	3	3	3	3	2	2
SSCAFFOLD00002_1456517	3	2	3	3	3	3	3	3	3	2	3	2	3	3	3	2	3	2	3	3	2
SSCAFFOLD00002_1456528	3	2	3	3	3	3	3	3	3	2	3	2	3	3	3	2	3	2	3	3	2
SSCAFFOLD00002_1510949	3	3	3	3	3	3	3	3	3	3	3	3	3	3	3	3	3	3	3	2	2
SSCAFFOLD00002_1516903	3	3	3	3	3	3	3	3	3	3	3	3	3	3	3	2	3	3	3	3	2
SSCAFFOLD00002_1516943	3	2	3	2	3	2	3	3	3	2	3	2	3	2	3	3	3	3	3	2	2
SSCAFFOLD00002_1516958	3	3	3	3	3	3	3	2	3	3	3	3	3	3	3	2	3	2	3	3	2
SSCAFFOLD00002_1516975	3	3	3	3	3	3	3	2	3	3	3	3	3	3	3	2	3	2	3	3	2
SSCAFFOLD00002_1516997	3	3	3	3	3	3	3	3	3	2	3	2	3	3	3	3	3	2	3	3	2
SSCAFFOLD00002_1517014	3	3	3	3	3	3	3	3	3	2	3	2	3	3	3	3	3	2	3	3	2
SSCAFFOLD00002_1517127	3	3	3	3	3	3	3	3	3	3	3	3	3	3	3	3	3	3	3	3	3
SSCAFFOLD00002_1517136	3	2	3	2	3	2	3	2	3	2	3	2	3	2	3	3	3	2	3	2	2
SSCAFFOLD00002_1517159	3	3	3	3	3	3	3	3	3	2	3	2	3	3	3	3	3	2	3	3	2
SSCAFFOLD00002_1517759	3	3	3	2	3	2	3	3	3	3	3	3	3	3	3	3	3	3	3	3	2
SSCAFFOLD00002_1517765	3	3	3	3	3	3	3	3	3	3	3	3	3	3	3	3	3	3	3	3	3
SSCAFFOLD00002_1517768	3	3	3	2	3	2	3	3	3	2	3	3	3	3	3	3	3	2	3	3	2
SSCAFFOLD00002_1519823	3	2	3	3	3	3	3	3	3	2	3	2	3	3	3	3	3	2	3	3	2
SSCAFFOLD00002_1531307	3	3	3	3	3	3	3	3	3	3	3	3	3	3	3	3	3	3	3	3	3
SSCAFFOLD00002_1531373	2	3	3	2	3	2	3	2	3	2	3	2	2	3	3	2	2	3	3	2	2
SSCAFFOLD00002_1531397	3	3	3	3	3	3	3	3	3	3	3	3	3	3	3	3	3	3	3	3	3
SSCAFFOLD00002_1531424	3	3	3	3	3	3	3	3	3	2	3	3	3	3	3	3	3	3	3	3	2
SSCAFFOLD00002_1531551	3	3	3	3	3	3	3	3	3	3	3	3	3	3	3	3	3	3	3	3	3
SSCAFFOLD00002_1531603	3	3	3	3	3	3	3	3	3	3	3	3	3	3	3	3	3	3	3	3	3
SSCAFFOLD00002_1545636	2	2	2	2	2	2	2	2	2	2	2	2	2	2	2	2	2	2	2	2	2
SSCAFFOLD00002_1646707	2	2	2	2	2	2	2	2	2	2	2	2	2	2	2	2	2	2	2	2	2
SSCAFFOLD00002_1725170	3	3	3	3	3	3	3	3	3	3	3	3	3	3	3	3	3	3	3	3	3
SSCAFFOLD00002_1725179	3	3	3	3	3	3	3	3	3	3	3	3	3	3	3	3	3	2	3	2	2
SSCAFFOLD00002_1738337	2	2	2	2	2	2	2	2	2	2	2	2	2	2	2	2	2	2	2	2	2
SSCAFFOLD00002_1771013	3	3	3	3	3	3	3	2	3	2	3	3	3	3	3	3	3	3	3	3	2
SSCAFFOLD00002_1823994	2	2	2	2	2	2	2	2	2	2	2	2	2	2	2	2	2	2	2	2	2
SSCAFFOLD00002_1864191	3	2	3	2	3	2	3	2	2	3	3	2	3	2	3	2	3	2	3	2	2
SSCAFFOLD00002_1895932	3	2	3	2	3	2	3	2	3	2	3	2	2	3	2	3	3	2	3	2	2
SSCAFFOLD00002_1897886	2	2	2	2	2	2	2	2	2	2	2	2	2	2	2	2	2	2	2	2	2
SSCAFFOLD00002_1897914	3	2	3	2	3	2	2	3	3	2	3	2	3	2	3	2	2	3	3	2	2
SSCAFFOLD00002_1897950	3	2	3	2	3	2	2	3	3	2	3	2	3	2	3	2	3	2	3	2	2
SSCAFFOLD00002_1995932	3	2	3	3	3	3	3	3	3	2	3	2	3	3	3	2	3	2	3	3	2
SSCAFFOLD00002_1998083	2	2	2	2	2	2	2	2	2	2	2	2	2	2	2	2	2	2	2	2	2
SSCAFFOLD00002_1998358	3	3	3	3	3	3	3	3	3	3	3	3	3	3	3	3	3	3	3	3	3
SSCAFFOLD00002_2089963	3	2	3	3	3	3	3	3	3	3	3	3	3	3	3	3	3	3	3	3	2
SSCAFFOLD00002_2089996	3	3	3	3	3	2	3	2	3	3	3	3	3	2	3	3	3	2	3	3	2
SSCAFFOLD00002_2100459	3	2	3	3	3	2	3	3	3	3	3	2	3	3	3	2	3	2	3	3	2
SSCAFFOLD00002_2107235	3	2	3	3	3	3	3	3	3	3	3	3	3	3	3	2	3	2	3	3	2
SSCAFFOLD00002_2107289	3	3	3	3	3	3	3	3	3	3	3	3	3	3	3	3	3	3	3	3	3
SSCAFFOLD00002_2123516	3	3	3	3	3	3	3	3	3	3	3	3	3	3	3	3	3	3	3	3	3
SSCAFFOLD00002_2123522	3	3	3	3	3	3	3	3	3	3	3	3	3	3	3	3	3	3	3	3	3
SSCAFFOLD00002_2123560	3	3	3	3	3	3	3	3	3	3	3	3	3	3	3	3	3	3	3	3	3
SSCAFFOLD00002_2136975	2	3	3	2	3	2	3	2	2	3	3	2	3	2	3	2	3	2	3	2	2
SSCAFFOLD00002_2150526	3	3	3	3	3	3	3	3	3	2	3	2	3	3	3	3	3	3	3	3	2
SSCAFFOLD00002_2151388	3	3	3	3	3	3	3	2	3	3	3	3	3	2	3	3	3	2	3	3	2
SSCAFFOLD00002_2173559	3	3	3	3	3	3	3	3	3	3	3	2	3	3	3	2	3	3	3	3	2
SSCAFFOLD00002_2173630	3	3	3	3	3	3	3	3	3	3	3	3	3	3	3	3	3	3	3	3	3
SSCAFFOLD00002_2440956	3	3	3	3	3	3	3	3	3	3	3	3	3	3	3	3	3	3	3	3	3
SSCAFFOLD00002_2448891	3	3	3	2	3	3	3	3	3	2	3	3	3	2	3	3	3	3	3	2	2
SSCAFFOLD00002_2457981	3	3	3	3	3	3	3	3	3	3	3	3	3	3	3	3	3	3	3	3	3
SSCAFFOLD00002_2458045	3	3	3	3	3	3	3	3	3	2	3	2	3	3	3	3	3	3	3	2	2
SSCAFFOLD00002_2458063	3	3	3	3	3	3	3	3	3	3	3	3	3	3	3	3	3	3	3	3	3
SSCAFFOLD00002_2458069	3	3	3	3	3	3	3	3	3	3	3	3	3	3	3	3	3	3	3	3	3
SSCAFFOLD00002_2464334	3	3	3	3	3	3	3	3	3	3	3	3	3	3	3	3	3	3	3	3	3
SSCAFFOLD00002_2464355	2	2	2	2	2	2	2	2	2	2	2	2	2	2	2	2	2	2	2	2	2
SSCAFFOLD00002_2471669	3	3	3	3	3	3	3	3	3	3	3	3	3	3	3	3	3	3	3	3	3
SSCAFFOLD00002_2471675	3	3	3	3	3	3	3	3	3	3	3	3	3	3	3	3	3	3	3	3	3
SSCAFFOLD00002_2546674	3	3	3	3	3	3	3	3	3	3	3	3	3	3	3	3	3	3	3	3	3
SSCAFFOLD00002_2548979	3	3	3	3	3	3	3	3	3	3	3	2	3	3	3	3	3	3	3	3	2
SSCAFFOLD00002_2556909	3	2	3	3	3	3	3	3	3	3	3	3	3	3	3	2	3	3	3	3	2
SSCAFFOLD00002_2556953	3	2	3	3	3	3	3	3	3	3	3	3	3	3	3	2	3	3	3	3	2
SSCAFFOLD00002_2569001	3	3	3	3	3	3	3	3	3	3	3	3	3	3	3	3	3	3	3	3	3
SSCAFFOLD00002_2569555	3	3	3	2	3	3	3	3	3	3	3	2	3	3	3	3	3	3	3	2	2
SSCAFFOLD00002_2599652	2	2	2	2	2	2	2	2	2	2	2	2	2	2	2	2	2	2	2	2	2
SSCAFFOLD00002_2600447	3	3	3	3	3	3	3	2	3	3	3	3	3	3	3	3	3	3	3	3	2
SSCAFFOLD00002_2622382	2	3	2	3	2	3	3	2	3	2	2	3	3	2	2	3	3	2	2	3	2
SSCAFFOLD00002_2635944	3	3	3	3	3	3	3	3	3	3	3	3	3	3	3	3	3	3	3	3	3
SSCAFFOLD00002_2637229	3	3	3	3	3	3	3	3	3	3	3	3	3	3	3	3	3	3	3	3	3
SSCAFFOLD00002_2660652	3	3	3	2	3	2	3	2	3	3	3	3	3	2	3	3	3	2	3	2	2
SSCAFFOLD00002_2671310	3	3	3	3	3	3	3	3	3	3	3	3	3	3	3	3	3	3	3	3	3
SSCAFFOLD00002_2679146	3	3	3	2	3	2	3	3	3	3	3	2	3	3	3	2	3	3	3	3	2
SSCAFFOLD00002_2679224	3	3	3	3	3	3	3	3	3	3	3	3	3	3	3	3	3	3	3	3	3
SSCAFFOLD00002_2679474	3	3	3	3	3	3	3	3	3	3	3	2	3	3	3	2	3	3	3	3	2
SSCAFFOLD00002_2725049	3	3	3	3	3	3	3	3	3	3	3	3	3	3	3	3	3	3	3	3	3
SSCAFFOLD00002_2728463	2	2	2	2	2	2	2	2	2	2	2	2	2	2	2	2	2	2	2	2	2
SSCAFFOLD00002_2728511	3	2	3	2	2	3	2	3	3	2	3	2	3	2	3	2	2	3	3	2	2
SSCAFFOLD00002_2753734	3	3	3	3	3	3	3	3	3	3	3	3	3	3	3	3	3	3	3	3	3
SSCAFFOLD00002_2753760	3	3	3	3	3	3	3	3	3	3	3	3	3	3	3	3	3	3	3	3	3
SSCAFFOLD00002_2755933	3	2	3	2	3	3	3	2	3	2	3	3	3	3	3	3	3	2	3	2	2
SSCAFFOLD00002_2755951	3	2	3	2	3	3	3	3	3	2	3	3	3	2	3	3	3	3	3	3	2
SSCAFFOLD00002_2828184	2	2	2	2	2	2	2	2	2	2	2	2	2	2	2	2	2	2	2	2	2
SSCAFFOLD00002_2835221	3	3	3	2	3	2	3	3	3	2	3	3	3	3	3	3	3	3	3	3	2
SSCAFFOLD00002_2835270	2	3	3	2	3	2	3	2	3	2	3	2	2	3	2	3	3	2	2	3	2
SSCAFFOLD00002_2835275	3	3	3	3	3	3	3	3	3	3	3	3	3	3	3	3	3	3	3	3	3
SSCAFFOLD00002_2835281	3	2	3	3	3	2	3	3	3	3	3	3	3	2	3	3	3	2	3	2	2
SSCAFFOLD00002_2835287	3	2	3	3	3	3	3	3	3	3	3	2	3	2	3	2	3	3	3	3	2
SSCAFFOLD00002_2835293	3	3	3	3	3	3	3	3	3	3	3	3	3	3	3	3	3	3	3	3	3
SSCAFFOLD00002_2835295	3	2	3	3	3	2	3	3	3	3	3	3	3	2	3	3	3	2	3	2	2
SSCAFFOLD00002_2835721	3	3	3	3	3	3	3	3	3	3	3	3	3	3	3	3	3	3	3	3	3
SSCAFFOLD00002_2846119	3	3	3	3	3	3	3	3	3	3	3	3	3	3	3	3	3	3	3	3	3
SSCAFFOLD00002_2852558	3	3	3	3	3	3	3	3	3	3	3	3	3	3	3	3	3	3	3	3	3
SSCAFFOLD00002_2852580	3	3	3	3	3	3	3	3	3	3	3	3	3	3	3	3	3	3	3	3	3
SSCAFFOLD00002_2852600	3	3	2	3	3	2	3	2	3	2	3	2	3	3	3	3	3	3	3	3	2
SSCAFFOLD00002_2857251	3	3	3	3	3	3	3	3	3	3	3	3	3	3	3	3	3	3	3	3	3
SSCAFFOLD00002_2869706	3	3	3	3	3	3	3	3	3	3	3	3	3	3	3	3	3	3	3	2	2
SSCAFFOLD00002_2869732	3	2	3	3	3	3	3	2	3	2	3	2	3	2	3	3	3	2	3	3	2
SSCAFFOLD00002_2869749	3	3	3	3	3	3	3	3	3	3	3	3	3	3	3	3	3	3	3	3	3
SSCAFFOLD00002_2869760	3	3	3	3	3	3	3	3	3	3	3	3	3	3	3	3	3	3	3	3	3
SSCAFFOLD00002_2869763	2	3	3	2	3	2	2	3	3	2	3	2	3	2	3	2	2	3	2	3	2
SSCAFFOLD00002_2879519	3	3	3	3	3	3	3	3	3	3	3	3	3	3	3	3	3	3	3	3	3
SSCAFFOLD00002_2879578	3	3	3	3	3	3	3	3	3	3	3	3	3	3	3	3	3	3	3	3	3
SSCAFFOLD00002_2885723	3	3	3	3	3	3	3	3	3	3	3	3	3	3	3	3	3	3	3	3	3
SSCAFFOLD00002_2901658	2	3	2	3	3	2	3	2	3	2	3	2	3	2	3	2	3	2	2	3	2
SSCAFFOLD00002_2901672	3	3	3	3	3	3	3	3	3	3	3	3	3	3	3	3	3	3	3	3	3
SSCAFFOLD00002_2913736	3	3	3	2	3	3	3	3	3	2	3	3	3	2	3	3	3	3	3	2	2
SSCAFFOLD00002_2932288	3	3	3	3	3	3	3	3	3	3	3	3	3	3	3	3	3	3	3	3	3
SSCAFFOLD00002_2932357	3	3	3	3	3	3	3	3	3	3	3	3	3	3	3	3	3	3	3	3	3
SSCAFFOLD00002_2932538	3	2	3	2	3	3	3	2	3	2	3	3	3	2	3	2	3	3	3	2	2
SSCAFFOLD00002_2939540	3	3	3	2	3	3	3	3	3	3	3	3	3	3	3	3	3	3	3	3	2
SSCAFFOLD00002_3007251	3	2	3	3	3	3	3	2	3	2	3	3	3	3	3	2	3	3	3	2	2
SSCAFFOLD00002_3007445	3	3	3	3	3	3	3	3	3	3	3	3	3	3	3	3	3	3	3	3	3
SSCAFFOLD00002_3029936	3	3	3	3	3	3	3	3	3	3	3	3	3	3	3	3	3	3	3	3	3
SSCAFFOLD00002_3030215	3	3	3	3	3	3	3	3	3	3	3	3	3	3	3	3	3	3	3	3	3
SSCAFFOLD00002_3030218	3	3	3	2	3	3	3	2	2	3	3	3	3	2	3	2	3	2	3	3	2
SSCAFFOLD00002_3065228	3	3	3	3	3	3	3	3	3	3	3	3	3	3	3	3	3	3	3	3	3
SSCAFFOLD00002_3065284	3	2	3	3	3	3	3	2	3	3	3	2	3	2	3	2	3	2	3	2	2
SSCAFFOLD00002_3065338	3	3	3	3	3	3	3	3	3	3	3	2	3	3	3	3	3	3	3	3	2
SSCAFFOLD00002_3077494	3	3	3	3	3	3	3	3	3	3	3	3	3	3	3	3	3	3	3	3	3
SSCAFFOLD00002_3079178	3	3	3	3	3	3	3	3	3	3	3	3	3	3	3	3	3	3	3	3	3
SSCAFFOLD00002_3106743	2	2	2	2	2	2	2	2	2	2	2	2	2	2	2	2	2	2	2	2	2
SSCAFFOLD00002_3210267	3	3	3	3	3	3	3	3	3	3	3	3	3	3	3	3	3	3	3	3	3
SSCAFFOLD00002_3221504	3	3	3	3	3	3	3	3	3	3	3	3	3	3	3	3	3	3	3	3	3
SSCAFFOLD00002_3235106	3	3	3	2	3	3	3	3	3	3	3	3	3	3	3	3	3	3	3	3	2
SSCAFFOLD00002_3235128	3	3	3	3	3	3	3	2	3	3	3	2	3	2	3	3	3	2	3	3	2
SSCAFFOLD00002_3235133	3	2	3	3	3	3	3	3	3	3	3	3	3	2	3	3	3	3	3	3	2
SSCAFFOLD00002_3290208	2	2	2	2	2	2	2	2	2	2	2	2	2	2	2	2	2	2	2	2	2
SSCAFFOLD00002_3307545	3	3	3	3	3	2	3	3	3	3	3	2	3	2	3	3	3	2	3	3	2
SSCAFFOLD00002_3307559	3	3	3	3	3	3	3	3	3	3	3	3	3	3	3	3	3	3	3	3	3
SSCAFFOLD00002_3307583	3	3	3	3	3	3	3	3	3	3	3	3	3	2	3	3	3	3	3	3	2
SSCAFFOLD00002_3412258	3	3	3	3	3	2	3	3	3	2	3	2	3	2	3	3	3	3	3	3	2
SSCAFFOLD00002_3471905	3	2	2	3	3	2	3	3	3	3	3	3	3	2	3	2	3	2	3	3	2
SSCAFFOLD00002_3484635	2	3	2	3	2	3	3	2	3	2	2	3	3	2	2	3	3	2	2	3	2
SSCAFFOLD00002_3495046	3	3	3	3	3	3	3	3	3	3	3	3	3	3	3	3	3	3	3	3	3
SSCAFFOLD00002_3495338	3	3	3	3	3	3	3	3	3	3	3	3	3	3	3	3	3	3	3	3	3
SSCAFFOLD00002_3596061	3	3	3	2	3	3	3	3	3	3	3	2	3	3	3	3	3	3	3	3	2
SSCAFFOLD00002_3596096	3	3	3	3	3	3	3	3	3	3	3	3	3	3	3	3	3	3	3	3	3
SSCAFFOLD00002_3630468	3	3	3	3	3	3	3	3	3	3	3	3	3	3	3	3	3	3	3	3	3
SSCAFFOLD00002_3630486	3	3	3	3	3	3	3	3	3	3	3	3	3	3	3	3	3	3	3	3	3
SSCAFFOLD00002_3634056	3	3	3	3	3	3	3	3	3	3	3	3	3	3	3	3	3	3	3	3	3
SSCAFFOLD00002_3654131	3	3	3	3	3	3	3	3	3	3	3	3	3	3	3	3	3	3	3	3	3
SSCAFFOLD00002_3678889	3	2	3	3	3	3	3	2	3	3	3	3	3	3	3	3	3	3	3	3	2
SSCAFFOLD00002_3678916	3	2	3	3	3	3	3	2	3	3	3	3	3	3	3	3	3	3	3	3	2
SSCAFFOLD00002_3685527	3	3	3	3	3	3	3	3	3	3	3	3	3	3	3	2	3	3	3	3	2
SSCAFFOLD00002_3688214	3	3	3	2	3	3	3	3	3	3	3	2	3	3	3	2	3	3	3	2	2
SSCAFFOLD00002_3707499	3	2	3	3	3	3	3	3	3	2	3	3	3	3	3	3	3	3	3	3	2
SSCAFFOLD00002_3707510	3	3	3	3	3	3	3	3	3	3	3	3	3	3	3	3	3	3	3	3	3
SSCAFFOLD00002_3707512	2	2	2	2	2	2	2	2	2	2	2	2	2	2	2	2	2	2	2	2	2
SSCAFFOLD00002_3707556	2	2	2	2	2	2	2	2	2	2	2	2	2	2	2	2	2	2	2	2	2
SSCAFFOLD00002_3707562	3	2	3	3	3	2	3	2	3	2	3	3	3	3	3	3	3	2	3	2	2
SSCAFFOLD00002_3707806	2	3	3	2	3	2	3	2	3	2	3	2	3	2	2	3	2	3	3	2	2
SSCAFFOLD00002_3707807	3	2	3	2	3	2	2	3	3	2	3	2	3	2	3	2	3	2	3	2	2
SSCAFFOLD00002_3708069	3	2	3	2	3	3	3	3	3	3	3	3	3	2	3	2	3	3	3	2	2
SSCAFFOLD00002_3708184	3	3	3	3	3	3	3	3	3	3	3	3	3	3	3	3	3	3	3	3	3
SSCAFFOLD00002_3708192	3	3	3	3	3	3	3	2	3	2	3	3	3	3	3	3	3	3	3	3	2
SSCAFFOLD00002_3710404	3	3	3	3	3	3	3	3	3	3	3	3	3	3	3	3	3	3	3	3	3
SSCAFFOLD00002_3710427	3	3	3	3	3	3	3	3	3	3	3	3	3	3	3	3	3	3	3	3	3
SSCAFFOLD00002_3710436	3	2	3	2	3	2	3	2	3	2	3	2	3	2	3	2	3	2	3	2	2
SSCAFFOLD00002_3710755	3	3	3	3	3	3	3	3	3	3	3	3	3	3	3	3	3	3	3	3	3
SSCAFFOLD00002_3710894	3	3	3	2	3	3	3	2	3	2	3	3	3	3	3	3	3	3	2	3	2
SSCAFFOLD00002_3712536	3	3	3	2	3	3	3	3	3	3	3	3	3	3	3	3	3	3	3	3	2
SSCAFFOLD00002_3712932	3	3	3	3	3	3	3	3	3	3	3	3	3	2	3	3	3	3	3	3	2
SSCAFFOLD00002_3718381	3	2	3	2	3	2	3	3	3	2	3	3	3	2	3	3	3	3	3	2	2
SSCAFFOLD00002_3718413	3	3	3	3	3	2	3	3	3	2	3	2	3	3	3	3	3	3	3	3	2
SSCAFFOLD00002_3861195	2	2	2	2	2	2	2	2	2	2	2	2	2	2	2	2	2	2	2	2	2
SSCAFFOLD00002_3875540	3	2	3	2	3	2	3	2	3	2	3	3	3	2	3	2	3	3	3	2	2
SSCAFFOLD00002_3875582	3	2	3	2	3	2	3	2	3	2	3	3	3	2	3	2	3	3	3	2	2
SSCAFFOLD00002_3875605	3	2	3	3	3	3	3	2	3	2	3	2	3	3	3	3	3	3	3	2	2
SSCAFFOLD00002_3942217	2	2	2	2	2	2	2	2	2	2	2	2	2	2	2	2	2	2	2	2	2
SSCAFFOLD00002_3942253	2	3	3	2	3	2	3	2	3	2	3	2	3	2	2	3	2	3	3	2	2
SSCAFFOLD00002_3942495	3	3	3	3	3	3	3	3	3	3	3	3	3	3	3	3	3	3	3	3	3
SSCAFFOLD00002_3942517	3	3	3	3	3	3	3	3	3	3	3	3	3	3	3	3	3	3	3	3	3
SSCAFFOLD00002_3942527	3	3	3	2	3	2	3	2	3	2	3	3	3	3	3	2	3	3	3	3	2
SSCAFFOLD00002_3944900	2	2	2	2	2	2	2	2	2	2	2	2	2	2	2	2	2	2	2	2	2
SSCAFFOLD00002_3977156	3	3	3	3	3	3	3	3	3	3	3	3	3	3	3	3	3	3	3	3	3
SSCAFFOLD00002_3996069	3	3	3	3	3	3	3	3	3	3	3	3	3	3	3	3	3	3	3	3	3
SSCAFFOLD00002_3996089	3	3	3	3	3	3	3	3	3	3	3	3	3	3	3	3	3	3	3	3	3
SSCAFFOLD00002_3996134	3	2	3	3	3	3	3	3	3	2	3	3	3	3	3	3	3	3	3	3	2
SSCAFFOLD00002_3996160	3	3	3	3	3	3	3	3	3	3	3	3	3	2	3	3	3	3	3	3	2
SSCAFFOLD00002_3996193	3	3	3	3	3	2	3	3	3	2	3	3	3	3	3	3	3	3	3	3	2
SSCAFFOLD00002_3996202	3	3	3	3	3	3	3	3	3	3	3	3	3	2	3	3	3	3	3	3	2
SSCAFFOLD00002_3996293	3	2	3	2	2	3	3	2	2	3	2	3	3	2	2	3	3	2	3	2	2
SSCAFFOLD00002_3996300	3	3	3	3	3	3	3	3	3	3	3	3	3	3	3	3	3	3	3	3	3
SSCAFFOLD00002_3996341	3	2	3	3	3	2	3	2	3	2	3	3	3	2	3	3	3	3	3	3	2
SSCAFFOLD00002_3996350	3	2	3	3	3	2	3	2	3	2	3	3	3	2	3	3	3	3	3	3	2
SSCAFFOLD00002_3996408	3	2	3	2	2	3	3	2	2	3	2	3	3	2	2	3	3	2	3	2	2
SSCAFFOLD00002_3996410	3	3	3	3	3	3	3	3	3	3	3	3	3	3	3	3	3	3	3	3	3
SSCAFFOLD00002_4001787	3	3	3	3	3	3	3	3	3	3	3	3	3	2	3	3	3	3	3	3	2
SSCAFFOLD00002_4073686	3	3	3	3	3	3	3	3	3	3	3	3	3	3	3	3	3	3	3	3	3
SSCAFFOLD00002_4093994	3	3	3	3	3	3	3	3	3	3	3	2	3	2	3	2	3	2	3	3	2
SSCAFFOLD00002_4094026	3	3	3	3	3	3	3	3	3	3	3	3	3	3	3	3	3	3	3	3	3
SSCAFFOLD00002_4120089	3	3	3	3	3	2	3	3	3	3	3	3	3	3	3	3	3	3	3	3	2
SSCAFFOLD00002_4120190	3	2	3	2	3	3	3	3	3	3	3	3	3	3	3	3	3	3	3	2	2
SSCAFFOLD00002_4132653	3	3	3	3	3	3	3	3	3	3	3	3	3	3	3	3	3	3	3	3	3
SSCAFFOLD00002_4138131	3	3	3	3	3	3	3	3	3	3	3	2	3	3	3	3	3	3	3	3	2
SSCAFFOLD00002_4143021	3	3	3	3	3	2	3	3	3	3	3	2	3	3	3	3	3	3	3	3	2
SSCAFFOLD00002_4152270	3	2	3	2	3	2	3	3	3	2	3	2	3	2	3	2	3	2	3	3	2
SSCAFFOLD00002_4182505	3	2	3	3	3	3	3	3	3	2	3	3	3	3	3	2	3	3	3	2	2
SSCAFFOLD00002_4196967	3	3	3	3	3	3	3	3	3	3	3	3	3	3	3	3	3	3	3	3	3
SSCAFFOLD00002_4197091	3	3	3	3	3	3	3	3	3	3	3	3	3	3	3	3	3	3	3	3	3
SSCAFFOLD00002_4265328	3	3	3	3	3	3	3	3	3	2	3	3	3	3	3	3	3	3	3	3	2
SSCAFFOLD00002_4267259	3	3	3	3	3	3	3	3	3	3	3	3	3	3	3	3	3	3	3	3	3
SSCAFFOLD00002_4267284	3	3	3	3	3	3	3	3	3	3	3	3	3	3	3	3	3	3	3	3	3
SSCAFFOLD00002_4343005	3	3	3	2	3	3	3	3	3	3	3	2	3	2	3	2	3	2	3	2	2
SSCAFFOLD00002_4343041	3	3	3	3	3	3	3	3	3	3	3	3	3	3	3	3	3	3	3	3	3
SSCAFFOLD00002_4356520	3	3	3	3	3	3	3	3	3	3	3	2	3	2	3	3	3	3	3	3	2
SSCAFFOLD00002_4356612	3	3	3	3	3	3	3	3	3	3	3	3	3	3	3	3	3	3	3	3	3
SSCAFFOLD00002_4382143	2	3	3	2	3	2	3	2	3	2	3	3	3	2	3	2	3	3	3	2	2
SSCAFFOLD00002_4382501	3	3	3	3	3	3	3	3	3	3	3	3	3	3	3	3	3	3	3	3	3
SSCAFFOLD00002_4382519	3	3	3	3	3	3	3	3	3	3	3	3	3	3	3	3	3	3	3	3	3
SSCAFFOLD00002_4382740	3	3	3	3	3	3	3	3	3	3	3	2	3	3	3	3	3	2	3	3	2
SSCAFFOLD00002_4395662	3	3	3	3	3	3	3	3	3	3	3	3	3	3	3	3	3	3	3	3	3
SSCAFFOLD00002_4395669	3	3	3	3	3	3	3	3	3	3	3	3	3	3	3	3	3	3	3	3	3
SSCAFFOLD00002_4405656	3	3	3	3	3	3	3	3	3	3	3	3	3	3	3	3	3	3	3	3	3
SSCAFFOLD00002_4405678	3	3	3	3	3	3	3	2	3	3	3	3	3	3	3	3	3	3	3	3	2
SSCAFFOLD00002_4410199	3	2	3	2	3	3	3	2	3	2	3	2	3	3	3	2	3	3	3	2	2
SSCAFFOLD00002_4417750	3	3	3	3	3	3	3	3	3	3	3	3	3	3	3	2	3	3	3	3	2
SSCAFFOLD00002_4418154	3	3	3	3	3	3	3	3	3	3	3	3	3	3	3	3	3	3	3	3	3
SSCAFFOLD00002_4418189	3	2	3	2	2	3	3	2	3	2	3	2	2	3	3	2	2	3	3	2	2
SSCAFFOLD00002_4418219	3	2	3	3	3	2	3	3	3	3	3	2	3	3	2	3	3	3	3	2	2
SSCAFFOLD00002_4418266	3	2	3	3	3	2	3	2	3	2	3	3	3	3	3	3	3	2	3	2	2
SSCAFFOLD00002_4418465	3	3	3	3	3	3	3	2	3	2	3	3	3	3	3	3	3	3	3	3	2
SSCAFFOLD00002_4466193	3	3	3	3	3	3	3	3	3	2	3	3	3	3	3	3	3	3	3	3	2
SSCAFFOLD00002_4481492	3	3	3	3	3	3	3	3	3	3	3	3	3	3	3	3	3	3	3	3	3
SSCAFFOLD00002_4496941	3	3	3	3	3	3	3	3	3	3	3	3	3	3	3	3	3	3	3	3	3
SSCAFFOLD00002_4496961	3	3	3	3	3	3	3	3	3	3	3	3	3	3	3	3	3	3	3	3	3
SSCAFFOLD00002_4496963	3	3	3	3	3	3	3	3	3	3	3	3	3	3	3	3	3	3	3	3	3
SSCAFFOLD00002_4496984	3	3	3	3	3	3	3	3	3	3	3	3	3	3	3	3	3	3	3	3	3
SSCAFFOLD00002_4539964	3	3	3	3	3	3	3	3	3	3	3	2	3	2	3	3	3	3	3	3	2
SSCAFFOLD00002_4559289	3	2	3	2	3	2	3	3	3	3	3	3	3	3	3	2	3	3	3	3	2
SSCAFFOLD00002_4559338	3	3	3	3	3	2	3	2	3	3	3	2	3	2	3	3	3	2	3	3	2
SSCAFFOLD00002_4559351	3	3	3	3	3	3	3	3	3	3	3	3	3	3	3	3	3	3	3	3	3
SSCAFFOLD00002_4569942	3	3	3	3	3	3	3	2	3	3	3	3	3	3	3	3	3	3	3	3	2
SSCAFFOLD00002_4592033	3	3	3	3	3	3	3	3	3	3	3	3	3	3	3	3	3	3	3	3	3
SSCAFFOLD00002_4617944	3	3	3	3	3	3	3	3	3	3	3	3	3	3	3	3	3	3	3	3	3
SSCAFFOLD00002_4633824	3	3	3	3	3	3	3	3	3	3	3	3	3	3	3	3	3	3	3	3	3
SSCAFFOLD00002_4633877	2	2	2	2	2	2	2	2	2	2	2	2	2	2	2	2	2	2	2	2	2
SSCAFFOLD00002_4633913	3	3	3	3	3	3	3	2	3	3	3	3	3	3	3	3	3	2	3	3	2
SSCAFFOLD00002_4637681	3	3	3	3	3	3	3	3	3	3	3	3	3	3	3	3	3	3	3	3	3
SSCAFFOLD00002_4647166	3	3	3	3	3	3	3	3	3	3	3	3	3	3	3	3	3	3	3	3	3
SSCAFFOLD00002_4647182	3	3	3	3	3	3	3	3	3	3	3	3	3	3	3	3	3	3	3	3	3
SSCAFFOLD00002_4647264	3	3	3	3	3	3	3	3	3	3	3	3	3	3	3	3	3	3	3	3	3
SSCAFFOLD00002_4647272	3	3	3	3	3	3	3	3	3	3	3	3	3	3	3	3	3	3	3	3	3
SSCAFFOLD00002_4651181	3	3	3	3	3	3	3	3	3	3	3	3	3	3	3	3	3	3	3	3	3
SSCAFFOLD00002_4651231	3	3	3	3	3	3	3	3	3	3	3	3	3	3	3	3	3	3	3	3	3
SSCAFFOLD00002_4657211	2	2	2	2	2	2	2	2	2	2	2	2	2	2	2	2	2	2	2	2	2
SSCAFFOLD00002_4657432	3	2	3	3	3	3	3	2	3	2	3	2	3	2	3	3	3	3	3	2	2
SSCAFFOLD00002_4657463	3	2	3	3	3	3	3	2	3	2	3	2	3	2	3	3	3	3	3	2	2
SSCAFFOLD00002_4659533	3	3	3	3	3	3	3	3	3	3	3	3	3	3	3	3	3	3	3	3	3
SSCAFFOLD00002_4665928	3	2	3	3	3	3	3	2	3	3	3	3	3	3	3	3	3	3	3	3	2
SSCAFFOLD00002_4665929	3	2	3	3	3	3	3	3	3	3	3	3	3	3	3	3	3	3	3	3	2
SSCAFFOLD00002_4665944	3	2	3	3	3	3	3	3	3	3	3	3	3	3	3	3	3	3	3	3	2
SSCAFFOLD00002_4665999	3	2	3	3	3	3	3	3	3	3	3	3	3	3	3	2	3	2	3	3	2
SSCAFFOLD00002_4666090	3	3	3	3	3	3	3	3	3	3	3	3	3	3	3	3	3	3	3	3	3
SSCAFFOLD00002_4666146	3	2	3	3	3	3	3	3	3	3	3	3	3	3	3	3	3	3	3	3	2
SSCAFFOLD00002_4675435	3	3	3	3	3	3	3	3	2	3	3	3	3	2	3	3	3	2	2	3	2
SSCAFFOLD00002_4718632	3	3	3	3	3	3	3	3	3	3	3	3	3	3	3	3	3	3	3	3	3
SSCAFFOLD00002_4718675	3	2	3	2	3	3	3	3	3	3	3	2	3	3	2	3	3	2	3	3	2
SSCAFFOLD00002_4718681	3	3	2	3	3	2	3	2	3	2	3	2	3	3	3	2	3	2	3	3	2
SSCAFFOLD00002_4718700	3	3	3	3	3	3	3	3	3	3	3	3	3	3	3	3	3	3	3	3	3
SSCAFFOLD00002_4718890	3	3	3	2	3	2	3	3	3	3	3	2	3	3	3	2	3	3	3	3	2
SSCAFFOLD00002_4721570	3	3	3	3	3	3	3	3	3	3	3	3	3	3	3	3	3	3	3	3	3
SSCAFFOLD00002_4721682	3	3	3	3	3	3	3	3	3	3	3	3	3	3	3	3	3	3	3	3	3
SSCAFFOLD00002_4721747	3	3	3	3	2	3	3	3	3	3	3	3	3	2	3	3	3	3	3	2	2
SSCAFFOLD00002_4746263	3	2	3	2	3	2	3	2	2	3	3	2	2	3	3	2	3	2	3	2	2
SSCAFFOLD00002_4943195	3	3	2	3	3	2	3	3	3	2	3	3	3	3	3	3	3	2	3	2	2
SSCAFFOLD00002_4943242	3	2	3	2	3	2	3	3	3	2	3	2	3	2	3	2	3	3	3	2	2
SSCAFFOLD00002_4943254	3	3	3	2	3	3	3	3	3	2	3	3	3	3	3	2	3	3	3	2	2
SSCAFFOLD00002_4955827	3	2	3	2	3	3	3	3	3	2	3	3	3	3	3	2	3	3	3	3	2
SSCAFFOLD00002_4962473	3	3	3	3	3	2	3	3	3	3	3	3	3	3	3	3	3	2	3	3	2
SSCAFFOLD00002_4979419	3	2	3	3	3	3	3	3	3	2	3	2	3	3	3	2	3	3	3	3	2
SSCAFFOLD00002_5002751	3	3	3	3	3	3	3	3	3	3	3	3	3	3	3	3	3	3	3	3	3
SSCAFFOLD00002_5002874	3	2	3	3	3	2	3	3	3	3	3	3	3	3	3	3	3	3	3	3	2
SSCAFFOLD00002_5002903	3	2	3	2	3	3	3	3	3	3	3	3	3	2	3	3	3	2	3	2	2
SSCAFFOLD00002_5002944	3	3	3	3	3	3	3	3	3	3	3	3	3	3	3	3	3	3	3	3	3
SSCAFFOLD00002_5002949	3	2	3	2	3	3	3	3	3	3	3	3	3	2	3	3	3	3	3	3	2
SSCAFFOLD00002_5002961	3	3	3	3	3	3	3	3	3	3	3	3	3	3	3	3	3	3	3	3	3
SSCAFFOLD00002_5002976	3	2	3	2	3	3	3	3	3	3	3	3	3	2	3	3	3	2	3	2	2
SSCAFFOLD00002_5031155	3	3	3	3	3	3	3	3	3	3	3	3	3	3	3	3	3	3	3	3	3
SSCAFFOLD00002_5057036	3	3	3	3	3	3	3	3	3	3	3	3	3	3	3	3	3	3	3	3	3
SSCAFFOLD00002_5057114	3	3	3	3	3	3	3	3	3	3	3	3	3	3	3	3	3	3	3	3	3
SSCAFFOLD00002_5057294	3	3	3	3	3	3	3	3	3	3	3	3	3	3	3	3	3	3	3	3	3
SSCAFFOLD00002_5057303	3	3	3	2	3	3	3	3	3	3	3	3	3	3	3	3	3	2	3	3	2
SSCAFFOLD00002_5057357	3	3	3	3	3	3	3	3	3	3	3	3	3	3	3	3	3	3	3	3	3
SSCAFFOLD00002_5057372	3	3	3	3	3	3	3	3	3	3	3	3	3	3	3	3	3	3	3	3	3
SSCAFFOLD00002_5069263	3	2	3	3	3	3	3	2	3	3	3	3	3	3	3	2	3	3	3	3	2
SSCAFFOLD00002_5069465	3	3	3	3	3	2	3	3	3	3	3	3	3	3	3	3	3	3	3	2	2
SSCAFFOLD00002_5074424	3	2	3	3	3	2	3	2	3	2	3	2	3	3	3	3	3	2	3	2	2
SSCAFFOLD00002_5075050	3	3	3	3	2	3	3	2	3	2	3	2	3	3	3	2	3	2	3	2	2
SSCAFFOLD00002_5076809	3	3	3	3	3	3	3	2	3	3	3	3	3	3	3	3	3	3	3	3	2
SSCAFFOLD00002_5132275	3	3	3	3	3	3	3	3	3	3	3	3	3	3	3	3	3	3	3	3	3
SSCAFFOLD00002_5151895	3	2	3	2	3	3	3	3	3	3	3	2	3	3	3	3	3	3	3	2	2
SSCAFFOLD00002_5161310	3	3	2	3	3	3	3	3	3	3	3	2	3	3	3	3	3	3	3	3	2
SSCAFFOLD00002_5162572	3	3	3	3	3	3	3	3	3	3	3	3	3	3	3	3	3	3	3	3	3
SSCAFFOLD00002_5162579	3	2	3	3	3	3	3	3	3	2	3	2	3	2	3	3	3	2	3	3	2
SSCAFFOLD00002_5162586	3	3	3	3	3	3	3	3	3	3	3	3	3	3	3	3	3	3	3	3	3
SSCAFFOLD00002_5162633	3	3	3	3	3	3	3	3	3	3	3	3	3	3	3	3	3	3	3	3	3
SSCAFFOLD00002_5162648	3	3	3	3	3	3	3	3	3	3	3	3	3	3	3	3	3	3	3	3	3
SSCAFFOLD00002_5162732	3	3	3	3	3	3	3	3	3	3	3	3	3	3	3	3	3	3	3	3	3
SSCAFFOLD00002_5162817	3	2	3	2	3	3	3	3	2	3	3	3	3	2	3	2	3	2	3	2	2
SSCAFFOLD00002_5162893	3	3	3	3	3	3	3	3	3	3	3	3	3	2	3	2	3	2	3	2	2
SSCAFFOLD00002_5165663	3	2	2	3	3	2	3	2	3	3	2	3	3	3	2	3	3	2	3	3	2
SSCAFFOLD00002_5213310	3	3	3	3	3	3	3	3	3	3	3	3	3	3	3	3	3	2	3	3	2
SSCAFFOLD00002_5226951	3	3	3	3	3	3	3	3	3	3	3	3	3	3	3	3	3	3	3	3	3
SSCAFFOLD00002_5258497	3	3	3	3	3	3	3	3	3	3	3	3	3	3	3	3	3	3	3	3	3
SSCAFFOLD00002_5258500	3	3	3	3	3	3	3	3	3	3	3	3	3	3	3	3	3	3	3	3	3
SSCAFFOLD00002_5258503	3	3	3	3	3	3	3	3	3	3	3	3	3	3	3	3	3	3	3	3	3
SSCAFFOLD00002_5258517	3	3	3	3	3	3	3	3	3	3	3	3	3	3	3	2	3	3	3	3	2
SSCAFFOLD00002_5258551	3	3	3	3	3	3	3	3	3	3	3	3	3	3	3	3	3	3	3	3	3
SSCAFFOLD00002_5310296	3	3	3	3	3	3	3	3	3	3	3	3	3	3	3	3	3	3	3	3	3
SSCAFFOLD00002_5341369	3	3	3	3	3	2	3	3	3	3	3	3	3	2	3	3	3	2	3	3	2
SSCAFFOLD00002_5357391	3	2	3	3	3	2	3	3	3	2	3	2	3	3	3	3	3	2	3	3	2
SSCAFFOLD00002_5368683	3	3	3	3	3	3	3	3	3	3	3	3	3	3	3	3	3	3	3	3	3
SSCAFFOLD00002_5368689	3	3	3	3	3	2	3	3	3	3	3	3	3	3	3	2	3	3	3	3	2
SSCAFFOLD00002_5368835	3	3	3	3	3	3	3	3	3	3	3	3	3	3	3	3	3	3	3	3	3
SSCAFFOLD00002_5368848	3	3	3	3	3	3	3	3	3	3	3	3	3	3	3	3	3	3	3	2	2
SSCAFFOLD00002_5382018	2	3	3	2	3	2	2	3	2	3	3	2	3	2	3	2	3	2	3	2	2
SSCAFFOLD00002_5429693	3	3	3	3	3	2	3	2	3	2	3	3	3	3	3	2	3	3	3	2	2
SSCAFFOLD00002_5431941	3	2	3	3	3	3	3	3	3	3	3	3	3	3	3	2	3	3	3	3	2
SSCAFFOLD00002_5432154	3	2	3	3	3	3	3	3	3	3	3	3	3	3	3	3	3	2	3	2	2
SSCAFFOLD00002_5440113	3	3	3	3	2	3	3	2	3	2	3	3	3	2	3	2	3	2	3	3	2
SSCAFFOLD00002_5444005	3	3	3	3	3	3	3	3	3	3	3	3	3	3	3	3	3	3	3	3	3
SSCAFFOLD00002_5481188	3	2	3	3	3	3	3	2	3	2	3	3	3	2	3	3	3	3	3	2	2
SSCAFFOLD00002_5492094	3	3	3	3	3	3	3	3	3	2	3	2	3	2	3	2	3	2	3	2	2
SSCAFFOLD00002_5494125	3	3	3	3	3	3	3	3	3	2	3	2	3	2	3	2	3	2	3	2	2
SSCAFFOLD00002_5495153	3	3	3	3	3	2	3	3	3	3	3	3	3	3	3	3	3	3	3	3	2
SSCAFFOLD00002_5521851	3	3	3	3	3	3	3	3	3	3	3	3	3	3	3	3	3	3	3	3	3
SSCAFFOLD00002_5521905	3	3	3	3	3	3	3	3	3	2	3	3	3	3	3	2	3	2	3	3	2
SSCAFFOLD00002_5521906	3	3	3	3	3	3	3	3	3	3	3	3	3	3	3	3	3	3	3	3	3
SSCAFFOLD00002_5521945	3	3	3	3	3	3	3	3	3	3	3	3	3	3	3	3	3	3	3	3	3
SSCAFFOLD00002_5558625	3	3	3	3	3	2	3	2	3	3	3	3	3	3	3	3	3	2	3	3	2
SSCAFFOLD00002_5788038	3	3	3	3	3	3	3	2	3	3	3	2	3	2	3	3	3	2	3	3	2
SSCAFFOLD00002_5792028	3	3	3	2	3	2	3	3	3	3	3	2	3	2	3	3	3	3	3	3	2
SSCAFFOLD00002_5792032	3	3	3	2	3	2	3	3	3	3	3	2	3	2	3	3	3	3	3	3	2
SSCAFFOLD00002_5797687	3	3	3	2	3	2	3	3	3	3	3	2	3	2	3	3	3	3	3	3	2
SSCAFFOLD00002_5801881	3	3	3	3	3	3	3	3	3	3	3	3	3	3	3	3	3	3	3	3	3
SSCAFFOLD00002_5801903	3	3	3	3	3	3	3	3	3	3	3	3	3	3	3	3	3	3	3	3	3
SSCAFFOLD00002_5801927	3	3	3	3	3	3	3	3	3	3	3	3	3	3	3	3	3	3	3	3	3
SSCAFFOLD00002_5801947	3	2	3	2	3	3	3	2	3	3	3	2	3	2	3	2	3	2	3	3	2
SSCAFFOLD00002_5802006	3	3	3	3	3	3	3	3	3	3	3	3	3	3	3	3	3	3	3	3	3
SSCAFFOLD00002_5802012	3	3	3	3	3	3	3	3	3	3	3	3	3	3	3	2	3	3	3	3	2
SSCAFFOLD00002_5802066	3	3	3	3	3	3	3	3	3	3	3	3	3	3	3	3	3	3	3	3	3
SSCAFFOLD00002_5802068	3	2	3	2	3	2	3	3	3	3	3	3	3	3	3	2	3	2	3	3	2
SSCAFFOLD00002_5802102	3	3	3	3	3	3	3	3	3	3	3	3	3	3	3	3	3	3	3	3	3
SSCAFFOLD00002_5802199	3	3	3	3	3	3	3	3	3	3	3	3	3	3	3	3	3	3	3	3	3
SSCAFFOLD00002_5806718	3	3	3	3	3	3	3	3	3	3	3	3	3	3	3	3	3	3	3	3	3
SSCAFFOLD00002_5806723	2	3	3	3	3	3	3	3	3	3	3	3	3	2	3	3	3	3	3	3	2
SSCAFFOLD00002_5806822	3	3	3	3	3	3	3	3	3	3	3	3	3	3	3	3	3	3	3	3	3
SSCAFFOLD00002_5815298	2	3	3	2	3	2	3	2	3	2	3	2	3	2	2	3	2	3	3	2	2
SSCAFFOLD00002_5830709	2	2	2	2	2	2	2	2	2	2	2	2	2	2	2	2	2	2	2	2	2
SSCAFFOLD00002_5876222	2	3	2	3	2	3	3	2	3	2	2	3	3	2	2	3	3	2	2	3	2
SSCAFFOLD00002_5890430	3	3	3	3	3	3	3	3	3	3	3	3	3	3	3	3	3	3	3	3	3
SSCAFFOLD00002_5904485	3	3	3	3	3	2	3	3	3	2	3	3	3	3	3	3	3	3	3	2	2
SSCAFFOLD00002_5904611	2	2	2	2	2	2	2	2	2	2	2	2	2	2	2	2	2	2	2	2	2
SSCAFFOLD00002_5915429	3	2	3	2	3	2	3	3	3	3	3	3	3	3	3	3	3	3	3	3	2
SSCAFFOLD00002_5941494	3	3	3	3	3	3	3	3	3	3	3	3	3	3	3	3	3	3	3	3	3
SSCAFFOLD00002_6025177	3	3	3	3	3	3	3	3	3	2	3	2	3	2	3	2	3	3	3	3	2
SSCAFFOLD00002_6029907	3	2	3	2	3	3	3	2	3	3	3	2	3	2	3	2	3	2	3	2	2
SSCAFFOLD00002_6029929	3	2	3	2	3	3	3	2	3	3	3	2	3	2	3	2	3	2	3	2	2
SSCAFFOLD00002_6145521	3	3	3	3	3	3	3	3	3	3	3	3	3	3	3	3	3	3	3	3	3
SSCAFFOLD00002_6145561	3	3	3	3	3	3	3	3	3	3	3	3	3	3	3	3	3	3	3	3	3
SSCAFFOLD00002_6158160	3	2	3	3	3	3	3	2	3	2	3	3	3	3	3	3	3	3	3	2	2
SSCAFFOLD00002_6158286	3	3	3	3	3	2	3	3	3	2	3	3	3	3	3	2	3	3	3	3	2
SSCAFFOLD00002_6159928	3	3	3	3	3	3	3	3	3	3	3	3	3	3	3	3	3	3	3	3	3
SSCAFFOLD00002_6159967	3	3	3	3	3	3	3	3	3	3	3	3	3	3	3	3	3	3	3	3	3
SSCAFFOLD00002_6261761	3	3	3	3	3	3	3	3	3	2	3	3	3	3	3	3	3	3	3	3	2
SSCAFFOLD00002_6262078	3	2	3	3	3	3	3	3	3	3	3	3	3	3	3	3	3	3	3	2	2
SSCAFFOLD00002_6262081	3	3	3	3	3	3	3	3	3	2	3	3	3	3	3	3	3	3	3	3	2
SSCAFFOLD00002_6314037	3	3	3	2	3	2	3	2	3	2	3	2	3	2	2	3	3	3	3	2	2
SSCAFFOLD00002_6314063	3	2	2	3	3	2	3	2	2	3	2	3	3	2	2	3	3	2	2	3	2
SSCAFFOLD00002_6314072	3	3	3	2	3	2	3	2	3	2	3	2	3	2	2	3	3	3	3	2	2
SSCAFFOLD00002_6320640	2	2	2	2	2	2	2	2	2	2	2	2	2	2	2	2	2	2	2	2	2
SSCAFFOLD00002_6320641	3	3	3	3	3	3	3	3	3	3	3	3	3	3	3	3	3	3	3	3	3
SSCAFFOLD00002_6320664	3	2	2	3	3	2	3	2	2	3	3	2	3	2	3	2	3	2	2	3	2
SSCAFFOLD00002_6320743	3	3	3	3	3	3	3	3	3	3	3	3	3	3	3	3	3	2	3	2	2
SSCAFFOLD00002_6322940	3	3	3	3	3	3	3	3	3	3	3	3	3	3	3	3	3	3	3	3	3
SSCAFFOLD00002_6323007	3	3	3	3	3	2	3	2	3	3	3	2	3	3	3	3	3	3	3	3	2
SSCAFFOLD00002_6323013	3	3	3	3	3	2	3	2	3	3	3	2	3	3	3	3	3	3	3	3	2
SSCAFFOLD00002_6325510	3	3	3	3	3	2	3	2	3	2	3	3	3	2	3	3	3	3	3	2	2
SSCAFFOLD00002_6345199	2	2	2	2	2	2	2	2	2	2	2	2	2	2	2	2	2	2	2	2	2
SSCAFFOLD00002_6346248	3	3	3	3	3	3	3	3	3	3	3	3	3	3	3	3	3	3	3	3	3
SSCAFFOLD00002_6477916	3	3	3	3	3	2	3	3	3	3	3	3	3	3	3	3	3	2	3	3	2
SSCAFFOLD00002_6477922	3	3	3	3	3	3	3	3	3	3	3	3	3	3	3	3	3	3	3	3	3
SSCAFFOLD00002_6501940	3	3	3	3	3	3	3	3	3	2	3	3	3	3	3	3	3	3	3	3	2
SSCAFFOLD00002_6513577	3	3	3	3	3	3	3	3	3	3	3	3	3	3	3	3	3	3	3	3	3
SSCAFFOLD00002_6513648	3	3	3	3	3	2	3	3	3	3	3	3	3	3	3	3	3	2	3	3	2
SSCAFFOLD00002_6526587	2	2	2	2	2	2	2	2	2	2	2	2	2	2	2	2	2	2	2	2	2
SSCAFFOLD00002_6532349	3	3	3	3	3	3	3	3	3	3	3	3	3	3	3	3	3	3	3	3	3
SSCAFFOLD00002_6546881	3	3	3	3	3	3	3	3	3	3	3	3	3	3	3	3	3	3	3	3	3
SSCAFFOLD00002_6546898	3	3	3	3	3	3	3	3	3	3	3	3	3	3	3	3	3	3	3	3	3
SSCAFFOLD00002_6614220	2	2	2	2	2	2	2	2	2	2	2	2	2	2	2	2	2	2	2	2	2
SSCAFFOLD00002_6869978	3	3	3	2	3	3	3	3	3	2	3	3	3	3	3	3	3	3	3	3	2
SSCAFFOLD00002_6895817	3	3	3	3	3	3	3	3	3	3	3	3	3	3	3	3	3	3	3	3	3
SSCAFFOLD00002_6946763	3	3	3	3	3	3	3	3	3	3	3	3	3	3	3	3	3	3	3	3	3
SSCAFFOLD00002_6946827	3	3	3	3	3	3	3	2	3	3	3	3	3	3	3	3	3	3	3	3	2
SSCAFFOLD00002_6961145	3	3	3	3	3	3	3	3	3	3	3	3	3	3	3	2	3	3	3	3	2
SSCAFFOLD00002_6961379	3	3	3	3	3	3	3	3	3	2	3	3	3	3	3	3	3	3	3	3	2
SSCAFFOLD00002_6973099	2	3	2	3	2	3	3	2	3	2	2	3	3	2	3	2	3	2	2	3	2
SSCAFFOLD00002_6973111	2	3	2	3	2	3	3	2	3	2	2	3	3	2	3	2	3	2	2	3	2
SSCAFFOLD00002_6974408	3	3	3	3	3	3	3	3	3	2	3	3	3	3	3	3	3	3	3	3	2
SSCAFFOLD00002_7036833	3	3	3	3	3	3	3	3	3	3	3	3	3	3	3	3	3	2	3	3	2
SSCAFFOLD00002_7068786	3	3	3	3	3	2	3	3	3	3	3	2	3	3	3	3	3	2	3	2	2
SSCAFFOLD00002_7068802	3	3	3	2	3	3	3	3	3	3	3	3	3	3	3	3	3	3	3	3	2
SSCAFFOLD00002_7068822	3	3	3	3	3	3	3	3	3	3	3	3	3	3	3	3	3	3	3	3	3
SSCAFFOLD00002_7068840	3	2	3	3	3	2	3	3	3	2	3	2	3	2	3	2	3	2	3	3	2
SSCAFFOLD00002_7108404	3	3	3	3	3	2	3	3	3	3	3	3	3	3	3	3	3	3	3	2	2
SSCAFFOLD00002_7108482	3	2	3	2	3	2	3	2	3	2	3	2	3	2	3	2	3	2	3	2	2
SSCAFFOLD00002_7112554	3	3	3	3	3	3	3	3	3	3	3	3	3	3	3	3	3	3	3	3	3
SSCAFFOLD00002_7113455	3	3	3	2	3	2	3	3	2	3	3	2	3	3	3	2	3	3	3	3	2
SSCAFFOLD00002_7113667	3	2	3	2	3	2	3	3	3	2	3	3	2	3	2	3	2	3	3	2	2
SSCAFFOLD00002_7113727	3	3	3	3	3	3	3	2	3	3	3	2	3	3	3	3	3	3	3	3	2
SSCAFFOLD00002_7162099	3	3	3	3	3	3	3	3	3	3	3	3	3	3	3	3	3	3	3	3	3
SSCAFFOLD00002_7165082	3	3	3	3	3	3	3	3	3	3	3	3	3	3	3	3	3	3	3	2	2
SSCAFFOLD00002_7165107	3	3	3	3	3	3	3	3	3	2	3	3	3	3	3	3	3	3	3	2	2
SSCAFFOLD00002_7165126	3	3	3	3	3	3	3	3	3	3	3	3	3	3	3	3	3	3	3	3	3
SSCAFFOLD00002_7171505	3	3	3	3	3	3	3	3	3	3	3	3	3	3	3	3	3	3	3	3	3
SSCAFFOLD00002_7171549	2	3	3	2	3	2	3	2	3	2	3	2	3	2	2	3	2	3	3	2	2
SSCAFFOLD00002_7291187	3	3	3	3	3	3	3	3	3	3	3	3	3	3	3	3	3	3	3	3	3
SSCAFFOLD00002_7291249	3	3	3	2	3	2	3	2	3	3	3	2	3	3	3	2	3	2	3	2	2
SSCAFFOLD00002_7291380	3	3	3	3	3	3	3	3	3	3	3	3	3	3	3	3	3	2	3	3	2
SSCAFFOLD00002_7291420	3	3	3	3	3	3	3	3	3	3	3	3	3	3	3	3	3	3	3	3	3
SSCAFFOLD00002_7374752	3	3	3	3	3	2	3	3	3	3	3	3	3	3	3	3	3	3	3	3	2
SSCAFFOLD00002_7374988	3	3	3	3	3	3	3	3	3	3	3	3	3	3	3	3	3	3	3	3	3
SSCAFFOLD00002_7375024	3	3	3	3	3	3	3	3	3	3	3	3	3	3	3	3	3	3	3	3	3
SSCAFFOLD00002_7375104	3	3	3	3	3	3	3	3	3	3	3	3	3	3	3	3	3	3	3	3	3
SSCAFFOLD00002_7375123	3	2	3	2	3	2	2	3	3	3	3	2	3	2	3	2	2	3	3	3	2
SSCAFFOLD00002_7375222	3	3	3	3	3	3	3	3	3	3	3	3	3	3	3	3	3	3	3	3	3
SSCAFFOLD00002_7376219	3	3	3	3	3	2	3	3	3	2	3	2	3	2	3	3	3	2	3	2	2
SSCAFFOLD00002_7384411	3	3	3	3	3	3	3	3	3	3	3	3	3	3	3	3	3	3	3	3	3
SSCAFFOLD00002_7417686	3	2	3	2	3	2	3	2	2	3	3	2	2	3	2	3	2	3	2	3	2
SSCAFFOLD00002_7418163	3	3	3	3	3	3	3	3	3	3	3	3	3	3	3	3	3	3	3	3	3
SSCAFFOLD00002_7418166	3	3	3	3	3	3	3	3	3	3	3	3	3	3	3	3	3	3	3	3	3
SSCAFFOLD00002_7437661	3	2	3	2	3	2	3	2	3	3	3	3	3	2	3	2	3	2	3	2	2
SSCAFFOLD00002_7437690	3	2	3	2	3	2	3	2	3	3	3	3	3	2	3	2	3	2	3	2	2
SSCAFFOLD00002_7486647	3	3	3	3	3	3	3	3	3	3	3	3	3	3	3	3	3	3	3	3	3
SSCAFFOLD00002_7486656	3	2	3	2	3	3	3	3	3	3	3	2	3	3	3	3	3	3	3	3	2
SSCAFFOLD00002_7498011	3	3	3	3	3	3	3	3	3	3	3	3	3	2	3	3	3	3	3	2	2
SSCAFFOLD00002_7586995	3	3	3	3	3	3	3	3	3	3	3	3	3	3	3	3	3	3	3	3	3
SSCAFFOLD00002_7587051	3	3	3	3	3	3	3	2	3	3	3	3	3	3	3	3	3	3	3	3	2
SSCAFFOLD00002_7606741	3	3	3	3	3	3	3	3	3	3	3	3	3	3	3	3	3	3	3	3	3
SSCAFFOLD00002_7668297	3	2	2	3	3	2	3	2	3	2	3	2	3	2	3	2	3	2	3	2	2
SSCAFFOLD00002_7686262	3	3	3	3	3	3	3	3	3	3	3	3	3	3	3	3	3	3	3	3	3
SSCAFFOLD00002_7710283	3	2	2	3	3	2	3	2	3	2	2	3	3	2	3	2	3	2	3	2	2
SSCAFFOLD00002_7710301	3	3	3	3	3	3	3	3	3	3	3	2	3	2	3	3	3	3	3	3	2
SSCAFFOLD00002_7739436	3	2	3	3	3	3	3	3	3	2	3	3	3	3	3	3	3	3	3	3	2
SSCAFFOLD00002_7739440	3	3	3	2	3	2	3	2	3	2	3	3	3	2	2	3	3	2	3	2	2
SSCAFFOLD00002_7739477	3	3	3	3	3	3	3	3	3	3	3	3	3	3	3	3	3	3	3	3	3
SSCAFFOLD00002_7740795	2	2	2	2	2	2	2	2	2	2	2	2	2	2	2	2	2	2	2	2	2
SSCAFFOLD00002_7753635	3	3	3	3	3	3	3	3	3	3	3	3	3	3	3	3	3	3	3	3	3
SSCAFFOLD00002_7753684	3	3	3	3	3	3	3	3	3	2	3	2	3	2	3	3	3	2	3	3	2
SSCAFFOLD00002_7755970	2	2	2	2	2	2	2	2	2	2	2	2	2	2	2	2	2	2	2	2	2
SSCAFFOLD00002_7755978	3	3	3	3	3	3	3	3	3	3	3	3	3	3	3	3	3	3	3	3	3
SSCAFFOLD00002_7761359	3	3	3	3	3	3	3	3	3	3	3	3	3	3	3	3	3	3	3	3	3
SSCAFFOLD00002_7763248	3	3	3	3	3	2	3	3	3	3	3	3	3	3	3	3	3	3	3	3	2
SSCAFFOLD00002_7774575	3	2	3	3	3	2	3	2	3	3	3	2	3	2	3	2	3	2	3	3	2
SSCAFFOLD00002_7814829	3	3	3	3	3	3	3	3	3	3	3	3	3	3	3	3	3	3	3	3	3
SSCAFFOLD00002_7814831	3	3	3	3	3	2	3	2	3	2	3	2	3	3	3	3	3	2	3	3	2
SSCAFFOLD00002_7814864	3	3	3	3	3	3	3	3	3	3	3	3	3	3	3	3	3	3	3	3	3
SSCAFFOLD00002_7814881	3	3	3	3	3	3	3	3	3	3	3	3	3	3	3	3	3	3	3	3	3
SSCAFFOLD00002_7834451	3	3	3	3	3	3	3	3	3	3	3	3	3	3	3	3	3	3	3	3	3
SSCAFFOLD00002_7857031	3	2	3	2	3	2	3	2	3	3	3	3	3	3	3	2	3	2	3	2	2
SSCAFFOLD00002_7878537	3	3	3	3	3	3	3	3	3	3	3	3	3	3	3	3	3	3	3	3	3
SSCAFFOLD00002_7882568	3	3	3	3	3	3	3	3	3	3	3	3	3	3	3	3	3	3	3	3	3
SSCAFFOLD00002_7883979	3	3	3	3	3	3	3	2	3	3	3	3	3	2	3	3	3	2	3	3	2
SSCAFFOLD00002_7899130	3	2	3	3	3	2	3	2	3	3	3	3	3	3	3	3	3	3	3	3	2
SSCAFFOLD00002_7900741	3	3	3	3	3	3	3	3	3	3	3	3	3	3	3	3	3	3	3	3	3
SSCAFFOLD00002_7900896	2	2	2	2	2	2	2	2	2	2	2	2	2	2	2	2	2	2	2	2	2
SSCAFFOLD00002_7900897	3	2	2	3	3	2	3	2	3	2	3	2	3	2	3	2	3	2	3	2	2
SSCAFFOLD00002_7900910	3	3	3	3	3	3	3	3	3	3	3	3	3	3	3	2	3	3	3	3	2
SSCAFFOLD00002_7900928	2	2	2	2	2	2	2	2	2	2	2	2	2	2	2	2	2	2	2	2	2
SSCAFFOLD00002_7900945	3	3	3	3	3	2	3	2	3	3	3	3	3	2	3	3	3	3	3	3	2
SSCAFFOLD00002_8072276	3	3	3	3	3	3	3	2	3	3	3	3	3	3	3	3	3	3	3	3	2
SSCAFFOLD00002_8072309	3	2	3	3	3	3	3	2	3	3	3	2	3	3	3	3	3	3	3	3	2
SSCAFFOLD00002_8072357	3	3	3	3	3	3	3	3	3	3	3	3	3	3	3	3	3	3	3	3	3
SSCAFFOLD00002_8072429	3	3	3	3	3	3	3	3	3	3	3	3	3	3	3	3	3	3	3	3	3
SSCAFFOLD00002_8072456	3	3	3	3	3	2	3	3	3	3	3	3	3	3	3	2	3	2	3	3	2
SSCAFFOLD00002_8111467	3	3	3	3	3	3	3	3	3	3	3	3	3	3	3	3	3	3	3	3	3
SSCAFFOLD00002_8111524	3	3	3	3	3	3	3	3	3	3	3	3	3	3	3	3	3	3	3	3	3
SSCAFFOLD00002_8198854	3	2	3	3	3	2	3	3	3	3	3	3	3	3	3	3	3	3	3	2	2
SSCAFFOLD00002_8198889	3	2	3	2	3	2	2	3	3	2	3	2	3	2	3	2	3	2	3	2	2
SSCAFFOLD00002_8201197	2	2	2	2	2	2	2	2	2	2	2	2	2	2	2	2	2	2	2	2	2
SSCAFFOLD00002_8203119	3	3	3	3	3	3	3	3	3	3	3	3	3	3	3	3	3	3	3	3	3
SSCAFFOLD00002_8203158	2	2	2	2	2	2	2	2	2	2	2	2	2	2	2	2	2	2	2	2	2
SSCAFFOLD00002_8214760	2	2	2	2	2	2	2	2	2	2	2	2	2	2	2	2	2	2	2	2	2
SSCAFFOLD00002_8228439	3	2	3	2	3	2	3	2	3	2	3	2	3	2	3	2	3	2	3	2	2
SSCAFFOLD00002_8236202	3	2	3	2	3	3	3	3	3	3	3	3	3	3	3	2	3	3	3	3	2
SSCAFFOLD00002_8248327	3	3	3	3	3	3	3	3	3	3	3	3	3	3	3	3	3	3	3	3	3
SSCAFFOLD00002_8252863	3	2	3	2	3	2	3	2	3	2	3	2	2	3	3	2	2	3	3	2	2
SSCAFFOLD00002_8252886	3	3	3	3	3	3	3	3	3	3	3	3	3	2	3	3	3	3	3	3	2
SSCAFFOLD00002_8252910	3	3	3	2	3	3	3	2	3	3	3	3	3	3	3	2	3	2	3	2	2
SSCAFFOLD00002_8252911	3	3	3	3	3	3	3	3	3	3	3	3	3	3	3	3	3	3	3	3	3
SSCAFFOLD00002_8252953	3	2	2	3	3	2	3	2	2	3	3	2	3	2	3	2	3	2	2	3	2
SSCAFFOLD00002_8253142	3	3	3	3	3	3	3	3	3	3	3	3	3	2	3	3	3	3	3	3	2
SSCAFFOLD00002_8253174	2	2	2	2	2	2	2	2	2	2	2	2	2	2	2	2	2	2	2	2	2
SSCAFFOLD00002_8268858	3	2	3	2	3	2	3	2	3	2	3	2	3	2	3	2	3	2	3	2	2
SSCAFFOLD00002_8315673	3	2	3	2	3	2	2	3	2	3	2	3	2	3	3	2	3	2	2	3	2
SSCAFFOLD00002_8315699	3	2	3	2	3	2	3	2	3	3	3	3	3	2	3	2	3	2	3	2	2
SSCAFFOLD00002_8327659	3	3	3	3	3	3	3	2	3	3	3	2	3	3	3	3	3	3	3	3	2
SSCAFFOLD00002_8327703	3	3	3	3	3	3	3	2	3	3	3	3	3	3	3	3	3	3	3	3	2
SSCAFFOLD00002_8345770	2	2	2	2	2	2	2	2	2	2	2	2	2	2	2	2	2	2	2	2	2
SSCAFFOLD00002_8345848	3	2	3	3	3	3	3	3	3	3	3	3	3	3	3	3	3	2	3	2	2
SSCAFFOLD00002_8363286	3	3	3	3	3	2	3	3	3	3	3	3	3	3	3	3	3	3	3	3	2
SSCAFFOLD00002_8363303	3	2	3	2	3	2	3	2	3	3	3	3	3	2	3	2	3	2	3	2	2
SSCAFFOLD00002_8363317	3	2	3	2	3	2	3	2	3	3	3	3	3	2	3	2	3	2	3	2	2
SSCAFFOLD00002_8442351	3	3	3	3	3	3	3	3	3	3	3	3	3	3	3	3	3	3	3	3	3
SSCAFFOLD00002_8442360	2	3	3	2	3	2	3	2	2	3	3	2	2	3	3	2	2	3	2	3	2
SSCAFFOLD00002_8442463	3	3	3	3	3	3	3	3	3	3	3	3	3	3	3	3	3	3	3	3	3
SSCAFFOLD00002_8472890	3	3	3	2	3	3	3	3	3	3	3	3	3	3	3	3	3	3	3	3	2
SSCAFFOLD00002_8472939	2	2	2	2	2	2	2	2	2	2	2	2	2	2	2	2	2	2	2	2	2
SSCAFFOLD00002_8472948	2	2	2	2	2	2	2	2	2	2	2	2	2	2	2	2	2	2	2	2	2
SSCAFFOLD00002_8472980	3	3	3	3	3	3	3	3	3	3	3	3	3	3	3	3	3	3	3	3	3
SSCAFFOLD00002_8473068	3	3	3	3	3	3	3	3	3	3	3	3	3	3	3	3	3	3	3	3	3
SSCAFFOLD00002_8473109	3	2	3	2	2	3	2	3	3	2	3	2	3	2	3	2	3	2	2	3	2
SSCAFFOLD00002_8473113	2	2	2	2	2	2	2	2	2	2	2	2	2	2	2	2	2	2	2	2	2
SSCAFFOLD00002_8473125	3	3	3	3	3	3	3	3	3	3	3	3	3	3	3	3	3	3	3	3	3
SSCAFFOLD00002_8502615	3	3	3	3	3	3	3	3	3	3	3	3	3	3	3	3	3	3	3	3	3
SSCAFFOLD00002_8502659	3	3	3	3	3	3	3	3	3	3	3	3	3	3	3	3	3	3	3	3	3
SSCAFFOLD00002_8502680	3	3	3	3	3	2	3	3	3	3	3	3	3	3	3	3	3	3	3	3	2
SSCAFFOLD00002_8502691	3	2	3	3	3	3	3	3	3	3	3	3	3	3	3	3	3	3	3	3	2
SSCAFFOLD00002_8502701	3	2	3	3	3	3	3	3	3	3	3	3	3	3	3	3	3	3	3	3	2
SSCAFFOLD00002_8510788	3	3	3	3	3	3	3	3	3	3	3	3	3	3	3	3	3	3	3	3	3
SSCAFFOLD00002_8510821	2	2	2	2	2	2	2	2	2	2	2	2	2	2	2	2	2	2	2	2	2
SSCAFFOLD00002_8510891	3	3	3	3	3	3	3	3	3	3	3	2	3	3	3	3	3	3	3	2	2
SSCAFFOLD00002_8511346	3	3	3	3	3	3	3	3	3	3	3	3	3	3	3	3	3	3	3	3	3
SSCAFFOLD00002_8511347	3	3	3	2	3	3	3	3	3	2	3	3	3	2	3	3	2	3	3	2	2
SSCAFFOLD00002_8511352	3	3	3	3	3	3	3	3	3	3	3	3	3	3	3	3	3	3	3	3	3
SSCAFFOLD00002_8516156	3	3	3	3	3	2	3	2	3	3	3	3	3	3	3	2	3	2	3	3	2
SSCAFFOLD00002_8518524	3	3	3	3	3	3	3	3	3	3	3	3	3	3	3	3	3	3	3	3	3
SSCAFFOLD00002_8532205	3	2	3	2	3	2	3	2	3	3	3	2	3	2	3	3	3	3	3	3	2
SSCAFFOLD00002_8603326	3	2	3	3	3	3	3	2	3	3	3	3	3	3	3	3	3	2	3	2	2
SSCAFFOLD00002_8603418	3	2	2	3	3	3	3	2	3	3	3	2	3	2	3	3	3	2	3	2	2
SSCAFFOLD00002_8694206	3	3	3	3	3	3	3	3	3	3	3	3	3	3	3	3	3	3	3	3	3
SSCAFFOLD00002_8799029	3	2	3	3	3	2	3	3	3	3	3	3	3	3	3	3	3	2	3	3	2
SSCAFFOLD00002_8862723	3	3	3	3	3	3	3	3	3	3	3	3	3	3	3	3	3	3	3	3	3
SSCAFFOLD00002_8862751	2	2	2	2	2	2	2	2	2	2	2	2	2	2	2	2	2	2	2	2	2
SSCAFFOLD00002_8871718	3	2	3	3	3	3	3	3	3	2	3	3	3	3	3	3	3	3	3	2	2
SSCAFFOLD00002_8890215	3	3	3	3	3	2	3	3	3	3	3	3	3	3	3	3	3	3	3	3	2
SSCAFFOLD00002_8924535	3	3	3	3	3	3	3	3	3	3	3	3	3	3	3	3	3	3	3	3	3
SSCAFFOLD00002_8939483	3	3	3	3	3	3	3	3	3	3	3	3	3	3	3	3	3	3	2	3	2
SSCAFFOLD00002_8939544	3	3	3	3	3	3	3	3	3	3	3	3	3	3	3	3	3	3	3	3	3
SSCAFFOLD00002_8954328	3	3	3	3	3	3	3	3	3	3	3	3	3	3	3	3	3	3	3	3	3
SSCAFFOLD00002_9015820	3	3	3	3	3	3	3	3	3	3	3	3	3	3	3	3	3	3	3	3	3
SSCAFFOLD00002_9017859	2	2	2	2	2	2	2	2	2	2	2	2	2	2	2	2	2	2	2	2	2
SSCAFFOLD00002_9027382	3	3	3	3	3	3	3	3	3	3	3	3	3	3	3	3	3	3	3	3	3
SSCAFFOLD00002_9057714	3	3	3	3	3	3	3	3	3	3	3	2	3	2	3	3	3	3	3	3	2
SSCAFFOLD00002_9057724	3	3	3	3	3	3	3	3	3	3	3	2	3	3	3	3	3	3	3	3	2
SSCAFFOLD00002_9070242	2	2	2	2	2	2	2	2	2	2	2	2	2	2	2	2	2	2	2	2	2
SSCAFFOLD00002_9070303	3	2	3	3	3	2	3	3	3	3	3	2	3	3	3	3	3	3	3	2	2
SSCAFFOLD00002_9071301	3	3	3	3	3	3	3	3	3	2	3	3	3	2	3	3	3	3	3	3	2
SSCAFFOLD00003_436381	3	2	3	2	3	3	3	2	3	2	3	2	3	2	3	3	3	2	3	2	2
SSCAFFOLD00003_436481	3	2	3	2	2	3	3	3	3	3	3	2	3	3	3	2	3	2	3	3	2
SSCAFFOLD00003_469130	3	3	3	2	3	3	3	3	3	3	3	3	3	2	3	3	3	3	3	3	2
SSCAFFOLD00003_469295	3	3	3	2	3	2	3	3	3	2	3	3	3	2	3	2	3	3	3	3	2
SSCAFFOLD00003_469413	2	3	3	2	3	2	3	2	3	2	3	2	3	2	2	3	3	2	3	2	2
SSCAFFOLD00003_532002	3	3	3	3	3	2	3	2	3	3	3	3	3	2	3	2	3	2	2	3	2
SSCAFFOLD00003_660588	3	2	3	2	2	3	3	2	3	2	3	2	3	2	3	2	3	2	3	2	2
SSCAFFOLD00003_699545	3	3	3	3	3	3	3	3	3	3	3	3	3	3	3	3	3	3	3	3	3
SSCAFFOLD00003_852646	3	3	3	3	3	2	3	3	3	2	3	3	3	3	3	2	3	3	3	3	2
SSCAFFOLD00003_857940	3	3	3	3	3	3	3	3	3	3	3	3	3	3	3	3	3	3	3	3	3
SSCAFFOLD00003_905250	3	2	3	2	3	3	3	2	3	2	3	3	3	3	3	3	3	2	3	2	2
SSCAFFOLD00003_905307	3	2	3	2	3	3	3	2	3	2	3	3	3	3	3	3	3	2	3	2	2
SSCAFFOLD00003_1134279	3	3	3	3	3	3	3	3	3	3	3	3	3	3	3	3	3	3	3	3	3
SSCAFFOLD00003_1143072	3	2	2	3	3	2	3	2	3	2	3	2	3	2	3	2	3	2	3	2	2
SSCAFFOLD00003_1169381	3	3	3	2	3	3	3	3	3	2	3	3	3	2	3	3	3	2	3	3	2
SSCAFFOLD00003_1254155	3	3	3	3	3	3	3	3	3	3	3	3	3	3	3	3	3	3	3	3	3
SSCAFFOLD00003_1258500	3	3	3	3	3	3	3	3	3	3	3	3	3	3	3	3	3	3	3	3	3
SSCAFFOLD00003_1263322	3	2	3	3	3	2	3	2	3	3	3	2	3	2	3	2	3	2	3	2	2
SSCAFFOLD00003_1296530	3	3	3	3	3	3	3	3	3	3	3	3	3	3	3	3	3	3	3	3	3
SSCAFFOLD00003_1296563	3	2	3	2	3	2	3	2	3	2	3	3	3	2	3	3	3	3	3	2	2
SSCAFFOLD00003_1297073	3	2	2	3	3	2	3	2	3	2	3	2	3	2	3	2	3	2	3	2	2
SSCAFFOLD00003_1320650	3	3	3	3	3	3	3	3	3	3	3	3	3	3	3	3	3	3	3	3	3
SSCAFFOLD00003_1320730	3	3	3	3	3	3	3	3	3	3	3	3	3	3	3	3	3	3	3	3	3
SSCAFFOLD00003_1392614	3	3	3	3	3	2	3	3	3	3	3	2	3	3	3	2	3	3	3	3	2
SSCAFFOLD00003_1494409	3	3	3	3	3	3	3	3	3	3	3	3	3	3	3	3	3	3	3	3	3
SSCAFFOLD00003_1494411	3	3	3	3	3	2	3	3	3	3	3	3	3	3	3	2	3	3	3	3	2
SSCAFFOLD00003_1494442	3	3	3	3	3	3	3	3	3	3	3	3	3	3	3	3	3	3	3	3	3
SSCAFFOLD00003_1500083	3	3	3	3	3	3	3	2	3	3	3	3	3	3	3	2	3	3	3	3	2
SSCAFFOLD00003_1500135	3	3	3	3	3	3	3	3	3	3	3	3	3	2	3	3	3	3	3	3	2
SSCAFFOLD00003_1534722	2	2	2	2	2	2	2	2	2	2	2	2	2	2	2	2	2	2	2	2	2
SSCAFFOLD00003_1534723	3	2	3	3	3	2	3	3	3	3	3	3	3	3	3	3	3	2	3	3	2
SSCAFFOLD00003_1534724	2	2	2	2	2	2	2	2	2	2	2	2	2	2	2	2	2	2	2	2	2
SSCAFFOLD00003_1628520	3	3	3	3	3	3	3	3	3	3	3	3	3	3	3	3	3	3	3	3	3
SSCAFFOLD00003_1637698	3	2	3	2	3	2	3	2	3	2	3	3	3	2	3	2	3	3	3	2	2
SSCAFFOLD00003_1829610	3	2	3	2	2	3	3	2	3	2	3	2	3	2	3	2	3	2	3	2	2
SSCAFFOLD00003_1829621	3	2	3	2	2	3	3	2	3	2	3	2	3	2	3	2	3	2	3	2	2
SSCAFFOLD00003_1829635	3	3	3	2	3	3	3	3	3	3	3	2	3	2	3	3	3	2	3	2	2
SSCAFFOLD00003_1829663	3	2	3	2	2	3	3	3	3	2	3	2	3	2	3	3	3	2	3	2	2
SSCAFFOLD00003_1829712	3	2	3	2	3	2	3	2	3	2	3	3	3	2	3	2	3	3	3	2	2
SSCAFFOLD00003_1829812	3	3	3	3	3	3	3	3	3	3	3	3	3	2	3	3	3	2	3	3	2
SSCAFFOLD00003_1829926	3	2	3	2	2	3	3	3	3	2	3	2	3	2	3	3	3	2	3	2	2
SSCAFFOLD00003_1866217	3	3	3	3	3	3	3	3	3	3	3	3	3	2	3	3	3	2	3	3	2
SSCAFFOLD00003_1926427	3	3	3	3	3	2	3	3	3	3	3	3	3	3	3	3	3	3	3	3	2
SSCAFFOLD00003_1926458	3	3	3	3	3	2	3	2	3	3	3	3	3	2	3	2	3	2	2	3	2
SSCAFFOLD00003_1955332	3	3	3	2	3	2	3	3	3	3	3	3	3	3	3	3	3	3	3	3	2
SSCAFFOLD00003_2037890	2	3	3	2	3	2	2	3	2	3	2	3	3	2	2	3	2	3	3	2	2
SSCAFFOLD00003_2048484	3	2	3	2	2	3	3	2	3	2	3	2	2	3	3	2	2	3	3	2	2
SSCAFFOLD00003_2048486	3	3	3	3	3	3	3	3	3	2	3	3	3	3	3	3	3	3	3	3	2
SSCAFFOLD00003_2048490	3	3	3	3	3	3	3	3	3	3	3	3	3	3	3	3	3	3	3	3	3
SSCAFFOLD00003_2048497	2	2	2	2	2	2	2	2	2	2	2	2	2	2	2	2	2	2	2	2	2
SSCAFFOLD00003_2048810	3	2	3	2	3	2	3	2	3	2	3	2	3	2	3	2	3	2	3	2	2
SSCAFFOLD00003_2050754	3	3	3	3	3	3	3	3	3	3	3	3	3	3	3	3	3	3	3	3	3
SSCAFFOLD00003_2052285	3	2	3	2	3	2	3	3	3	2	3	2	3	3	3	2	3	2	2	3	2
SSCAFFOLD00003_2055053	3	3	3	3	3	3	3	3	3	3	3	3	3	3	3	3	3	3	3	3	3
SSCAFFOLD00003_2189808	3	3	3	3	3	3	3	3	3	3	3	3	3	3	3	3	3	3	3	3	3
SSCAFFOLD00003_2189819	3	3	3	3	3	3	3	3	3	3	3	2	2	3	2	3	3	2	3	3	2
SSCAFFOLD00003_2195376	3	3	3	3	3	3	3	3	3	3	3	3	3	3	3	3	3	3	3	3	3
SSCAFFOLD00003_2195419	3	3	3	3	3	3	3	3	3	3	3	3	3	3	3	3	3	3	3	3	3
SSCAFFOLD00003_2195421	3	3	3	3	3	3	3	3	3	3	3	3	3	3	3	3	3	3	3	3	3
SSCAFFOLD00003_2195434	3	3	3	3	3	3	3	3	3	3	3	3	3	3	3	3	3	3	3	3	3
SSCAFFOLD00003_2200201	3	3	3	3	3	3	3	3	3	3	3	3	3	3	3	3	3	3	3	3	3
SSCAFFOLD00003_2207376	3	3	3	3	3	3	3	3	3	3	3	3	3	3	3	3	3	3	3	3	3
SSCAFFOLD00003_2207407	3	3	3	3	3	2	3	2	3	3	3	3	3	2	3	2	3	2	3	3	2
SSCAFFOLD00003_2237755	3	3	3	2	3	3	3	3	3	3	3	3	3	3	3	3	3	3	3	2	2
SSCAFFOLD00003_2239747	3	3	3	3	3	3	3	3	3	3	3	3	3	3	3	3	3	3	3	3	3
SSCAFFOLD00003_2273737	3	3	3	3	3	3	3	3	3	3	3	3	3	3	3	3	3	3	3	3	3
SSCAFFOLD00003_2284287	3	2	3	2	3	2	3	3	3	3	3	2	3	2	3	2	3	2	3	2	2
SSCAFFOLD00003_2327673	3	3	3	2	3	3	3	3	3	3	3	2	3	3	3	3	3	2	3	3	2
SSCAFFOLD00003_2327722	3	3	3	2	3	3	3	3	3	3	3	2	3	3	3	3	3	2	3	3	2
SSCAFFOLD00003_2327727	3	3	3	3	3	3	3	3	3	3	3	3	3	3	3	3	3	2	3	3	2
SSCAFFOLD00003_2327876	3	2	3	2	3	2	3	3	3	2	3	3	3	2	3	3	3	3	3	3	2
SSCAFFOLD00003_2327904	3	3	3	2	3	3	3	3	3	3	3	3	3	3	3	3	3	3	3	3	2
SSCAFFOLD00003_2327983	3	3	3	2	3	3	3	3	3	3	3	3	3	3	3	3	3	3	3	3	2
SSCAFFOLD00003_2328001	3	3	3	2	3	3	3	3	3	3	3	3	3	3	3	3	3	3	3	3	2
SSCAFFOLD00003_2364076	3	3	3	3	3	3	3	3	3	3	3	3	3	3	3	3	3	3	3	3	3
SSCAFFOLD00003_2367661	3	3	3	2	3	3	3	2	3	2	3	3	3	3	3	3	3	3	3	3	2
SSCAFFOLD00003_2404044	3	3	3	3	3	3	3	3	3	3	3	3	3	3	3	3	3	3	3	3	3
SSCAFFOLD00003_2405341	3	3	3	3	3	3	3	3	3	3	3	3	3	3	3	3	3	3	3	3	3
SSCAFFOLD00003_2405474	3	3	3	3	3	3	3	3	3	3	3	3	3	3	3	3	3	3	3	3	3
SSCAFFOLD00003_2433312	3	2	3	2	3	2	3	2	3	2	3	2	3	2	3	2	3	2	3	2	2
SSCAFFOLD00003_2433988	3	3	3	3	3	3	3	3	3	3	3	3	3	3	3	3	3	3	3	3	3
SSCAFFOLD00003_2434026	3	3	3	3	3	3	3	3	3	3	3	3	3	3	3	3	3	3	3	3	3
SSCAFFOLD00003_2434036	3	3	3	3	3	3	3	3	3	3	3	3	3	3	3	3	3	3	3	3	3
SSCAFFOLD00003_2434046	3	3	3	3	3	3	3	3	3	3	3	3	3	3	3	3	3	3	3	3	3
SSCAFFOLD00003_2436446	3	2	3	2	3	2	3	2	3	2	3	2	3	3	3	2	3	3	3	3	2
SSCAFFOLD00003_2480053	3	2	3	3	3	3	3	3	3	3	3	3	3	2	3	3	3	3	3	3	2
SSCAFFOLD00003_2482536	3	3	3	3	3	3	3	3	3	3	3	3	3	3	3	3	3	3	3	3	3
SSCAFFOLD00003_2482701	3	3	3	3	3	3	3	3	3	3	3	3	3	3	3	3	3	3	3	3	3
SSCAFFOLD00003_2626567	3	3	3	3	3	3	3	3	3	3	3	3	3	3	3	3	3	3	3	3	3
SSCAFFOLD00003_2778706	3	3	3	3	3	3	3	3	3	3	3	3	3	3	3	3	3	2	3	3	2
SSCAFFOLD00003_2778809	3	3	3	3	3	2	3	3	3	3	3	3	3	2	3	3	3	3	3	3	2
SSCAFFOLD00003_2778963	3	3	3	3	3	3	3	3	3	3	3	3	3	3	3	3	3	3	3	3	3
SSCAFFOLD00003_2778976	3	3	3	3	3	3	3	3	3	3	3	3	3	3	3	3	3	3	3	3	3
SSCAFFOLD00003_2778997	3	3	3	3	3	3	3	3	3	3	3	3	3	3	3	3	3	2	3	3	2
SSCAFFOLD00003_2779065	3	3	3	3	3	3	3	3	3	3	3	3	3	3	3	3	3	3	3	3	3
SSCAFFOLD00003_2846616	2	2	2	2	2	2	2	2	2	2	2	2	2	2	2	2	2	2	2	2	2
SSCAFFOLD00003_2846619	3	3	3	3	3	3	3	3	3	3	3	3	3	3	3	3	3	3	3	3	3
SSCAFFOLD00003_2846736	3	3	3	3	3	3	3	2	3	3	3	3	3	3	3	3	3	3	3	3	2
SSCAFFOLD00003_2846940	3	3	3	3	3	3	3	3	3	3	3	3	3	3	3	3	3	3	3	3	3
SSCAFFOLD00003_2846980	3	3	3	3	3	3	3	3	3	3	3	3	3	3	3	3	3	3	3	3	3
SSCAFFOLD00003_2846993	3	3	3	3	3	2	3	3	3	3	3	3	3	3	3	3	3	3	3	2	2
SSCAFFOLD00003_2847029	3	2	3	2	2	3	3	2	3	2	3	2	3	2	3	2	3	2	3	2	2
SSCAFFOLD00003_2956116	3	3	3	3	3	3	3	3	3	3	3	3	3	3	3	3	3	3	3	3	3
SSCAFFOLD00003_2964202	3	3	3	3	3	2	3	3	3	3	3	3	3	2	3	3	3	2	3	3	2
SSCAFFOLD00003_2974429	3	3	3	3	3	3	3	3	3	3	3	3	3	3	3	3	3	3	3	3	3
SSCAFFOLD00003_3063761	3	3	3	3	3	3	3	3	3	3	3	3	3	3	3	3	3	3	3	3	3
SSCAFFOLD00003_3063823	3	3	3	3	3	3	3	3	3	3	3	2	3	3	3	3	3	3	3	3	2
SSCAFFOLD00003_3064050	3	3	3	3	3	3	3	3	3	3	3	3	3	3	3	3	3	3	3	3	3
SSCAFFOLD00003_3087003	3	3	3	3	3	3	3	3	3	3	3	3	3	3	3	3	3	3	3	3	3
SSCAFFOLD00003_3144767	3	2	3	3	3	2	3	3	3	2	3	2	3	3	3	2	3	2	3	3	2
SSCAFFOLD00003_3144836	3	3	3	3	3	3	3	3	3	3	3	3	3	3	3	3	3	3	3	3	3
SSCAFFOLD00003_3144858	3	3	3	2	3	3	3	3	3	3	3	3	3	2	3	3	3	3	3	3	2
SSCAFFOLD00003_3144905	3	3	3	3	3	3	3	3	3	3	3	3	3	3	3	3	3	3	3	3	3
SSCAFFOLD00003_3153768	3	2	3	3	3	3	3	2	3	3	3	3	3	2	3	2	3	3	3	2	2
SSCAFFOLD00003_3153827	3	3	3	3	3	3	3	3	3	3	3	3	3	3	3	3	3	3	3	3	3
SSCAFFOLD00003_3153991	3	3	3	3	3	3	3	3	3	3	3	3	3	3	3	3	3	3	3	3	3
SSCAFFOLD00003_3165692	3	3	3	3	3	3	3	3	3	3	3	3	3	3	3	3	3	3	3	3	3
SSCAFFOLD00003_3179016	3	3	3	3	3	3	3	3	3	3	3	3	3	3	3	3	3	3	3	3	3
SSCAFFOLD00003_3179029	3	3	3	3	3	3	3	2	3	2	3	3	3	3	3	2	3	3	3	3	2
SSCAFFOLD00003_3179262	3	2	3	2	3	2	3	3	3	3	3	3	3	3	3	3	3	2	3	3	2
SSCAFFOLD00003_3184715	3	2	3	2	3	2	3	2	3	2	3	2	3	2	2	3	3	2	3	2	2
SSCAFFOLD00003_3185382	3	3	3	3	3	2	3	3	3	3	3	3	3	3	3	3	3	3	3	2	2
SSCAFFOLD00003_3194449	3	3	3	3	3	3	3	3	3	3	3	3	3	3	3	3	3	3	3	3	3
SSCAFFOLD00003_3194474	3	3	3	3	3	3	3	3	3	3	3	3	3	3	3	3	3	3	3	3	3
SSCAFFOLD00003_3194480	3	3	3	3	3	3	3	3	3	3	3	3	3	3	3	3	3	3	3	3	3
SSCAFFOLD00003_3194602	2	2	2	2	2	2	2	2	2	2	2	2	2	2	2	2	2	2	2	2	2
SSCAFFOLD00003_3194664	3	3	3	3	3	2	3	2	3	3	3	3	3	3	3	2	3	2	3	3	2
SSCAFFOLD00003_3194741	3	3	3	3	3	3	3	3	3	3	3	3	3	3	3	3	3	3	3	3	3
SSCAFFOLD00003_3243738	3	2	3	2	2	3	3	2	3	2	3	2	3	2	3	2	3	2	2	3	2
SSCAFFOLD00003_3567724	3	2	3	2	3	2	3	2	3	2	2	3	3	2	3	2	3	2	3	2	2
SSCAFFOLD00003_3567777	2	2	2	2	2	2	2	2	2	2	2	2	2	2	2	2	2	2	2	2	2
SSCAFFOLD00003_3569981	3	2	3	2	3	2	3	2	3	3	3	3	3	2	3	2	3	3	3	3	2
SSCAFFOLD00003_3569986	3	2	3	3	3	2	3	2	3	2	3	2	3	2	3	2	3	3	3	2	2
SSCAFFOLD00003_3569999	3	3	3	3	3	3	3	3	3	3	3	3	3	2	3	3	3	2	3	3	2
SSCAFFOLD00003_3570049	3	3	3	3	3	3	3	3	3	3	3	3	3	3	3	3	3	3	3	3	3
SSCAFFOLD00003_3592620	3	3	3	3	3	3	3	3	3	3	3	3	3	3	3	3	3	3	3	3	3
SSCAFFOLD00003_3592733	3	3	3	3	3	2	3	2	3	3	3	3	3	2	3	2	3	2	2	3	2
SSCAFFOLD00003_3721904	2	2	2	2	2	2	2	2	2	2	2	2	2	2	2	2	2	2	2	2	2
SSCAFFOLD00003_3779873	3	3	3	3	3	3	3	2	3	3	3	3	3	3	3	3	3	3	3	3	2
SSCAFFOLD00003_3799586	3	3	3	3	3	3	3	3	3	3	3	3	3	3	3	3	3	3	3	3	3
SSCAFFOLD00003_3919354	3	3	3	3	3	3	3	3	3	3	3	3	3	3	3	3	3	3	3	3	3
SSCAFFOLD00003_3919384	3	3	3	3	3	3	3	3	3	2	3	2	3	2	3	3	3	3	3	2	2
SSCAFFOLD00003_3943112	3	3	3	3	3	3	3	3	3	3	3	3	3	3	3	3	3	3	3	3	3
SSCAFFOLD00003_3981320	3	3	3	3	3	3	3	3	3	2	3	3	3	3	3	3	3	3	3	2	2
SSCAFFOLD00003_3992317	3	2	3	3	3	3	3	3	3	2	3	2	3	2	3	2	3	3	3	3	2
SSCAFFOLD00003_3993130	3	3	3	3	3	3	3	3	3	3	3	3	3	3	3	3	3	3	3	3	3
SSCAFFOLD00003_4066390	3	3	3	3	3	3	3	3	3	3	3	3	3	3	3	3	3	3	3	3	3
SSCAFFOLD00003_4194706	3	3	3	3	3	3	3	3	3	2	3	3	3	2	3	2	3	2	3	2	2
SSCAFFOLD00003_4194710	3	3	3	3	3	2	3	2	3	3	3	3	3	2	3	2	3	2	3	3	2
SSCAFFOLD00003_4194726	3	3	3	3	3	3	3	3	3	3	3	3	3	3	3	3	3	3	3	3	3
SSCAFFOLD00003_4194971	3	3	3	3	3	3	3	3	3	3	3	3	3	3	3	3	3	3	3	3	3
SSCAFFOLD00003_4231128	3	3	3	3	3	3	3	3	3	3	3	3	3	3	3	3	3	3	3	3	3
SSCAFFOLD00003_4236417	3	3	3	3	3	3	3	3	3	3	3	3	3	3	3	3	3	3	3	3	3
SSCAFFOLD00003_4236440	3	3	3	3	3	3	3	3	3	3	3	3	3	3	3	3	3	2	3	3	2
SSCAFFOLD00003_4236470	3	3	3	3	3	3	3	3	3	3	3	3	3	3	3	3	3	3	3	3	3
SSCAFFOLD00003_4236481	3	3	3	3	3	3	3	3	3	3	3	3	3	3	3	3	3	3	3	3	3
SSCAFFOLD00003_4246436	3	3	3	3	3	2	3	3	3	3	3	3	3	3	3	3	3	2	3	2	2
SSCAFFOLD00003_4356760	3	3	3	3	3	3	3	3	3	3	3	3	3	3	3	3	3	3	3	3	3
SSCAFFOLD00003_4412279	3	3	3	2	2	3	3	2	3	2	3	2	3	2	3	2	3	2	3	2	2
SSCAFFOLD00003_4433093	3	3	3	3	3	3	3	3	3	3	3	3	3	3	3	3	3	3	3	3	3
SSCAFFOLD00003_4453945	3	3	3	3	3	3	3	3	3	2	3	3	3	3	3	3	3	3	3	2	2
SSCAFFOLD00003_4453952	3	3	3	3	3	3	3	3	3	2	3	3	3	3	3	3	3	3	3	2	2
SSCAFFOLD00003_4453989	3	3	3	3	3	3	3	3	3	2	3	3	3	3	3	3	3	3	3	2	2
SSCAFFOLD00003_4456302	3	3	3	3	3	3	3	3	3	2	3	3	3	3	3	3	3	3	3	2	2
SSCAFFOLD00003_4456525	3	3	3	3	3	3	3	3	3	2	3	3	3	3	3	2	3	3	3	2	2
SSCAFFOLD00003_4456797	3	2	3	2	3	2	3	2	3	2	3	2	3	2	3	2	3	2	3	2	2
SSCAFFOLD00003_4457022	3	3	3	3	3	2	3	2	3	3	3	3	3	3	3	3	3	3	3	3	2
SSCAFFOLD00003_4550780	3	3	3	3	3	3	3	3	3	3	3	3	3	3	3	3	3	3	3	3	3
SSCAFFOLD00003_4553960	3	2	3	3	3	3	3	2	3	2	3	3	3	3	3	3	3	3	3	3	2
SSCAFFOLD00003_4616929	3	3	3	3	3	2	3	2	3	3	3	3	3	2	3	2	3	2	2	3	2
SSCAFFOLD00003_4649729	3	3	3	3	3	3	3	3	3	3	3	3	3	3	3	3	3	3	3	3	3
SSCAFFOLD00003_4649995	3	3	3	3	3	3	3	3	3	3	3	3	3	3	3	3	3	3	3	3	3
SSCAFFOLD00003_4661891	3	3	3	3	3	3	3	3	3	3	3	3	3	3	3	3	3	3	3	3	3
SSCAFFOLD00003_4689502	3	3	3	3	3	3	3	3	3	3	3	3	3	3	3	3	3	3	3	3	3
SSCAFFOLD00003_4697640	3	3	3	3	3	3	3	3	3	3	3	3	3	3	3	3	3	3	3	3	3
SSCAFFOLD00003_4796462	3	2	3	2	3	3	3	2	3	3	3	3	3	3	3	3	3	3	3	3	2
SSCAFFOLD00003_4796591	3	2	3	2	3	3	3	2	3	3	3	3	3	3	3	3	3	3	3	3	2
SSCAFFOLD00003_4858752	3	3	3	2	3	2	3	3	3	2	3	2	3	3	3	2	3	3	3	2	2
SSCAFFOLD00003_4859113	2	3	3	2	3	2	2	3	2	3	3	2	2	3	3	2	2	3	2	3	2
SSCAFFOLD00003_4859131	3	2	3	3	3	3	3	3	3	2	3	2	2	3	3	2	3	2	3	2	2
SSCAFFOLD00003_4887547	3	3	3	3	3	3	3	3	3	2	3	3	3	3	3	3	3	2	3	3	2
SSCAFFOLD00003_4887550	3	3	3	3	3	3	3	3	3	3	3	3	3	3	3	3	3	2	3	3	2
SSCAFFOLD00003_4977806	3	3	2	3	2	3	3	2	3	3	3	3	3	2	2	3	3	2	3	3	2
SSCAFFOLD00003_4978013	3	3	3	3	3	3	3	2	3	3	3	3	3	2	3	3	3	2	3	3	2
SSCAFFOLD00003_5001641	3	3	3	2	3	3	3	3	3	3	3	3	3	2	3	2	3	3	3	3	2
SSCAFFOLD00003_5035233	3	3	3	3	3	3	3	3	3	2	3	3	3	3	3	3	3	3	3	3	2
SSCAFFOLD00003_5035246	3	3	3	3	3	3	3	2	3	3	3	3	3	3	3	3	3	3	3	3	2
SSCAFFOLD00003_5039420	3	3	3	3	3	3	3	2	3	3	3	3	3	2	3	2	3	2	3	3	2
SSCAFFOLD00003_5039463	3	2	3	3	3	2	3	2	3	2	3	2	3	2	3	2	3	2	3	3	2
SSCAFFOLD00003_5039487	3	3	3	3	3	3	3	2	3	3	3	2	3	3	3	3	3	3	3	3	2
SSCAFFOLD00003_5044495	3	3	3	3	3	3	3	3	3	2	3	2	3	3	3	3	3	3	3	3	2
SSCAFFOLD00003_5044529	2	2	2	2	2	2	2	2	2	2	2	2	2	2	2	2	2	2	2	2	2
SSCAFFOLD00003_5044819	3	3	3	3	3	2	3	2	3	3	3	3	3	3	3	3	3	3	3	3	2
SSCAFFOLD00003_5082629	3	3	3	3	3	3	3	3	3	3	3	3	3	3	3	3	3	3	3	3	3
SSCAFFOLD00003_5082655	3	3	3	3	3	2	3	2	3	3	3	3	3	2	3	3	3	2	3	3	2
SSCAFFOLD00003_5110362	3	2	3	3	3	3	3	2	3	2	3	2	3	3	2	3	3	2	3	2	2
SSCAFFOLD00003_5130032	3	2	3	2	3	2	3	2	3	2	3	2	3	2	3	2	3	2	2	3	2
SSCAFFOLD00003_5130043	3	3	3	3	3	2	3	3	3	2	3	3	3	3	3	2	3	2	3	2	2
SSCAFFOLD00003_5150173	3	3	3	3	3	3	3	3	3	3	3	3	3	3	3	3	3	3	3	3	3
SSCAFFOLD00003_5150240	3	3	3	3	3	2	3	2	3	2	3	2	3	3	3	3	3	3	3	3	2
SSCAFFOLD00003_5150448	3	2	3	2	3	3	3	2	3	2	3	3	3	2	3	2	3	3	3	2	2
SSCAFFOLD00003_5173967	3	3	3	3	3	3	3	3	3	3	3	3	3	3	3	3	3	3	3	3	3
SSCAFFOLD00003_5174032	3	3	3	3	3	3	3	3	3	3	3	3	3	3	3	3	3	3	3	3	3
SSCAFFOLD00003_5174051	3	3	3	3	3	3	3	3	3	3	3	3	3	3	3	3	3	3	3	2	2
SSCAFFOLD00003_5174078	3	2	3	2	3	2	3	2	3	2	3	2	3	2	2	3	3	2	3	2	2
SSCAFFOLD00003_5174080	3	3	3	3	3	2	3	3	3	3	3	3	3	3	3	3	2	3	3	2	2
SSCAFFOLD00003_5176776	3	3	3	3	3	3	3	2	3	3	3	3	3	2	3	3	3	3	3	3	2
SSCAFFOLD00003_5176889	3	3	3	3	3	3	3	3	3	3	3	3	3	3	3	3	3	3	3	3	3
SSCAFFOLD00003_5176915	3	3	3	3	3	3	3	3	3	3	3	3	3	3	3	3	3	3	3	3	3
SSCAFFOLD00003_5176981	3	3	3	2	3	2	3	2	3	2	3	3	3	3	3	3	3	3	3	2	2
SSCAFFOLD00003_5177013	3	3	3	3	3	3	3	3	3	3	3	3	3	3	3	3	3	3	3	3	3
SSCAFFOLD00003_5177041	3	3	3	3	3	3	3	3	3	3	3	3	3	3	3	3	3	3	3	3	3
SSCAFFOLD00003_5177065	3	3	3	3	3	3	3	2	3	3	3	3	3	2	3	3	3	3	3	3	2
SSCAFFOLD00003_5177070	3	3	3	3	3	3	3	3	3	3	3	3	3	3	3	3	3	3	3	3	3
SSCAFFOLD00003_5177088	3	3	3	3	3	3	3	3	3	3	3	3	3	3	3	3	3	3	3	3	3
SSCAFFOLD00003_5177089	3	3	3	3	3	3	3	3	3	3	3	3	3	3	3	3	3	3	3	3	3
SSCAFFOLD00003_5179474	3	3	3	3	3	2	3	2	3	3	3	3	3	2	3	2	3	2	2	3	2
SSCAFFOLD00003_5192646	3	3	3	3	3	3	3	3	3	3	3	3	3	3	3	3	3	3	3	3	3
SSCAFFOLD00003_5192672	3	3	3	3	3	3	3	3	3	2	3	2	3	3	3	3	3	2	3	3	2
SSCAFFOLD00003_5212310	3	3	3	3	3	3	3	3	3	2	3	3	3	3	3	3	3	3	3	3	2
SSCAFFOLD00003_5212574	3	3	3	3	3	3	3	3	3	3	3	3	3	3	3	3	3	3	3	3	3
SSCAFFOLD00003_5213320	3	2	2	3	2	3	3	2	2	3	2	3	3	2	3	2	3	2	3	2	2
SSCAFFOLD00003_5214717	3	3	3	3	3	3	3	3	3	3	3	3	3	3	3	3	3	3	3	3	3
SSCAFFOLD00003_5226960	3	3	3	3	3	3	3	3	3	3	3	3	3	3	3	3	3	3	3	3	3
SSCAFFOLD00003_5240718	3	2	3	2	3	2	3	2	3	2	3	2	2	3	3	2	3	2	2	3	2
SSCAFFOLD00003_5240811	3	2	3	2	3	3	3	3	3	2	3	2	3	3	3	2	3	3	3	3	2
SSCAFFOLD00003_5240821	3	2	3	3	3	3	3	2	3	3	3	2	3	3	3	3	3	2	3	3	2
SSCAFFOLD00003_5240858	3	3	3	3	3	3	3	3	3	3	3	3	3	3	3	3	3	3	3	3	3
SSCAFFOLD00003_5246321	3	3	3	3	3	3	3	3	3	3	3	3	3	3	3	3	3	3	3	3	3
SSCAFFOLD00003_5249755	3	3	3	3	3	3	3	3	3	3	3	3	3	3	3	3	3	3	3	3	3
SSCAFFOLD00003_5249772	3	2	3	3	3	3	3	3	3	3	3	3	3	2	3	3	3	3	3	3	2
SSCAFFOLD00003_5249792	3	3	3	3	3	3	3	2	3	3	3	3	3	3	3	3	3	3	3	3	2
SSCAFFOLD00003_5249803	3	3	3	3	3	3	3	2	3	3	3	3	3	3	3	3	3	3	3	3	2
SSCAFFOLD00003_5249820	3	3	3	3	3	3	3	3	3	3	3	3	3	3	3	3	3	3	3	3	3
SSCAFFOLD00003_5249833	3	3	3	3	3	3	3	2	3	3	3	3	3	3	3	3	3	3	3	3	2
SSCAFFOLD00003_5249837	3	3	3	3	3	3	3	3	3	3	3	2	3	3	3	3	3	3	3	3	2
SSCAFFOLD00003_5249852	3	3	3	3	3	3	3	3	3	3	3	3	3	3	3	3	3	3	3	3	3
SSCAFFOLD00003_5341405	3	3	3	3	3	3	3	3	3	3	3	2	3	3	3	2	3	3	3	2	2
SSCAFFOLD00003_5341850	3	3	3	3	3	3	3	3	3	3	3	3	3	3	3	3	3	3	3	3	3
SSCAFFOLD00003_5491708	3	3	3	3	3	3	3	3	3	3	3	3	3	3	3	3	3	3	3	3	3
SSCAFFOLD00003_5505970	3	3	3	3	3	2	3	2	3	3	3	2	3	3	2	3	3	2	3	3	2
SSCAFFOLD00003_5505991	3	3	3	3	3	2	3	3	3	3	3	3	3	2	3	3	3	2	3	3	2
SSCAFFOLD00003_5576494	3	3	3	3	3	3	3	3	3	2	3	3	3	3	3	3	3	3	3	3	2
SSCAFFOLD00003_5576520	3	3	3	3	3	3	3	2	3	3	3	2	3	2	3	2	3	2	3	2	2
SSCAFFOLD00003_5576585	3	3	3	3	3	3	3	2	3	3	3	3	3	2	3	3	3	2	3	3	2
SSCAFFOLD00003_5576636	3	3	3	3	3	3	3	3	3	3	3	3	3	3	3	3	3	3	3	3	3
SSCAFFOLD00003_5594124	3	2	3	2	3	3	3	3	3	3	3	3	3	3	3	3	3	2	3	3	2
SSCAFFOLD00003_5594157	2	2	2	2	2	2	2	2	2	2	2	2	2	2	2	2	2	2	2	2	2
SSCAFFOLD00003_5594176	2	2	2	2	2	2	2	2	2	2	2	2	2	2	2	2	2	2	2	2	2
SSCAFFOLD00003_5594203	2	2	2	2	2	2	2	2	2	2	2	2	2	2	2	2	2	2	2	2	2
SSCAFFOLD00003_5594209	2	2	2	2	2	2	2	2	2	2	2	2	2	2	2	2	2	2	2	2	2
SSCAFFOLD00003_5605595	3	3	3	3	3	3	3	3	3	3	3	3	3	3	3	3	3	3	3	3	3
SSCAFFOLD00003_5605598	3	2	3	2	3	2	3	2	3	2	3	2	2	3	3	2	2	3	3	2	2
SSCAFFOLD00003_5605638	3	3	3	3	3	3	3	3	3	3	3	3	3	3	3	3	3	3	3	3	3
SSCAFFOLD00003_5605686	3	3	3	3	3	3	3	3	3	3	3	3	3	3	3	2	3	2	3	2	2
SSCAFFOLD00003_5872049	3	3	3	3	3	3	3	3	3	3	3	3	3	3	3	3	3	3	3	3	3
SSCAFFOLD00003_5872155	3	3	3	3	3	3	3	3	3	3	3	3	3	3	3	2	3	3	3	3	2
SSCAFFOLD00003_5872162	3	3	3	3	3	3	3	3	3	3	3	3	3	3	3	2	3	3	3	3	2
SSCAFFOLD00003_5872169	3	2	3	3	3	2	3	2	3	3	3	2	3	2	3	3	3	2	3	3	2
SSCAFFOLD00003_5921359	2	3	3	2	3	2	3	2	3	2	3	2	3	2	3	2	3	2	3	2	2
SSCAFFOLD00003_5921369	3	2	3	2	2	3	3	2	3	2	2	3	3	2	3	2	3	2	3	2	2
SSCAFFOLD00003_6052278	3	2	3	3	3	3	3	3	3	3	3	3	3	3	3	3	3	3	3	2	2
SSCAFFOLD00003_6272853	3	3	3	2	3	2	3	2	3	3	3	3	3	2	3	2	3	2	3	3	2
SSCAFFOLD00003_6317958	3	3	3	3	3	2	3	2	3	2	3	3	3	2	3	3	3	2	3	2	2
SSCAFFOLD00003_6530491	3	3	3	3	3	3	3	3	3	2	3	2	3	3	3	2	3	3	3	3	2
SSCAFFOLD00003_6530586	3	3	2	3	3	2	3	2	3	2	3	2	3	2	2	3	3	3	3	2	2
SSCAFFOLD00003_6816394	3	3	3	3	3	3	3	2	3	2	3	3	3	2	3	3	3	2	3	2	2
SSCAFFOLD00003_6869274	3	3	3	3	3	3	3	3	3	2	3	3	3	3	3	3	3	3	3	3	2
SSCAFFOLD00003_6870773	3	3	3	3	3	3	3	3	3	3	3	3	3	3	3	3	3	3	3	3	3
SSCAFFOLD00003_6965729	3	3	3	3	3	3	3	3	3	3	3	3	3	3	3	3	3	3	3	3	3
SSCAFFOLD00003_7119413	3	3	3	3	3	3	3	3	3	3	3	3	3	3	3	3	3	3	3	3	3
SSCAFFOLD00003_7119449	2	2	2	2	2	2	2	2	2	2	2	2	2	2	2	2	2	2	2	2	2
SSCAFFOLD00003_7119495	3	3	3	3	3	3	3	3	3	3	3	3	3	3	3	3	3	3	3	3	3
SSCAFFOLD00003_7239685	3	3	3	3	3	3	3	3	3	3	3	3	3	3	3	3	3	3	3	3	3
SSCAFFOLD00003_7324763	3	3	3	3	3	3	3	3	3	3	3	3	3	3	3	3	3	3	3	3	3
SSCAFFOLD00003_7324799	3	3	3	3	3	3	3	3	3	3	3	3	3	3	3	3	3	3	3	3	3
SSCAFFOLD00003_7456214	3	2	2	3	2	3	3	2	3	2	3	2	3	2	3	2	3	2	3	2	2
SSCAFFOLD00003_7493003	3	3	3	3	3	3	3	3	3	3	3	3	3	3	3	3	3	3	3	2	2
SSCAFFOLD00003_7493014	2	2	2	2	2	2	2	2	2	2	2	2	2	2	2	2	2	2	2	2	2
SSCAFFOLD00003_7621696	3	3	3	3	3	3	3	2	3	3	3	3	3	3	3	3	3	3	3	2	2
SSCAFFOLD00003_7621725	3	2	2	3	2	3	3	2	3	2	3	2	3	2	3	2	3	2	3	2	2
SSCAFFOLD00003_7621746	3	2	3	2	3	2	3	2	3	2	3	2	2	3	2	3	2	3	3	2	2
SSCAFFOLD00003_7621989	3	3	3	3	3	3	3	3	3	3	3	3	3	3	3	3	3	3	3	3	3
SSCAFFOLD00003_7621992	3	2	3	2	3	2	3	2	3	2	3	2	2	3	2	3	2	3	3	2	2
SSCAFFOLD00003_7687387	3	3	3	3	3	3	3	3	3	3	3	3	3	3	3	3	3	3	3	3	3
SSCAFFOLD00003_7787236	3	3	3	2	3	3	3	3	3	3	3	3	3	3	3	3	3	3	3	3	2
SSCAFFOLD00003_7787246	3	2	3	2	3	2	3	2	3	2	3	2	2	3	2	3	2	3	3	2	2
SSCAFFOLD00003_7787256	3	3	3	3	3	3	3	3	3	3	3	3	3	3	3	3	3	3	3	3	3
SSCAFFOLD00003_7787264	3	3	3	3	3	3	3	3	3	3	3	3	3	3	3	3	3	3	3	3	3
SSCAFFOLD00003_7787423	3	3	3	3	3	3	3	3	3	3	3	2	3	3	3	3	3	3	3	3	2
SSCAFFOLD00003_7787451	3	3	3	3	3	3	3	3	3	3	3	3	3	3	3	3	3	3	3	3	3
SSCAFFOLD00003_7787466	3	3	3	3	3	3	3	3	3	3	3	3	3	3	3	3	3	3	3	3	3
SSCAFFOLD00003_7801472	3	3	3	3	3	3	3	3	3	3	3	3	3	3	3	3	3	3	3	3	3
SSCAFFOLD00003_7802875	3	2	3	3	3	2	3	3	3	2	3	3	2	3	2	3	3	3	3	2	2
SSCAFFOLD00003_7802909	3	3	3	3	3	3	3	3	3	3	3	3	3	3	3	3	3	3	3	3	3
SSCAFFOLD00003_7802953	3	3	3	3	3	3	3	3	3	3	3	3	3	3	3	3	3	3	3	3	3
SSCAFFOLD00003_7802976	3	3	3	3	3	3	3	3	3	3	3	3	3	3	3	3	3	3	3	3	3
SSCAFFOLD00003_7916598	3	2	3	2	3	3	3	3	3	3	3	3	3	3	3	2	3	3	3	3	2
SSCAFFOLD00003_7944837	3	2	3	2	3	2	3	3	3	3	2	3	3	3	3	3	3	3	3	2	2
SSCAFFOLD00003_8044626	3	2	3	2	3	2	3	3	3	2	2	3	3	2	3	3	3	2	3	2	2
SSCAFFOLD00003_8269234	3	3	3	3	3	3	3	3	3	3	3	3	3	3	3	3	3	3	3	3	3
SSCAFFOLD00003_8269238	3	2	3	3	3	3	3	2	3	3	3	2	3	3	3	2	3	2	3	2	2
SSCAFFOLD00003_8269252	3	2	3	2	3	2	3	2	3	2	2	3	3	2	3	2	3	2	3	2	2
SSCAFFOLD00003_8269269	3	3	3	3	3	3	3	3	3	3	3	3	3	3	3	3	3	3	3	3	3
SSCAFFOLD00003_8269277	3	2	3	3	3	3	3	2	3	3	3	2	3	3	3	2	3	2	3	2	2
SSCAFFOLD00003_8270337	3	3	3	3	3	3	3	3	3	3	3	3	3	3	3	3	3	3	3	3	3
SSCAFFOLD00003_8271225	3	3	3	3	3	3	3	3	3	3	3	3	3	3	3	3	3	3	3	3	3
SSCAFFOLD00003_8327774	3	2	3	2	3	2	3	2	3	2	3	2	3	2	2	3	3	2	3	2	2
SSCAFFOLD00003_8327806	3	2	3	2	3	2	3	2	3	2	3	2	3	2	2	3	3	2	3	2	2
SSCAFFOLD00003_8327901	3	2	3	2	3	3	3	2	3	3	3	2	3	3	3	3	3	3	3	2	2
SSCAFFOLD00003_8327928	3	3	3	3	3	3	3	2	3	2	2	3	3	2	3	2	3	2	3	3	2
SSCAFFOLD00003_8346564	3	3	3	3	3	3	3	3	3	3	3	3	3	3	3	3	3	3	3	3	3
SSCAFFOLD00003_8346653	3	3	3	3	3	3	3	3	3	3	3	3	3	3	3	3	3	3	3	3	3
SSCAFFOLD00003_8348576	2	2	2	2	2	2	2	2	2	2	2	2	2	2	2	2	2	2	2	2	2
SSCAFFOLD00003_8461364	3	3	3	3	3	3	3	3	3	3	3	3	3	3	3	3	3	3	3	3	3
SSCAFFOLD00003_8464166	3	3	3	3	3	3	3	2	3	3	3	3	3	3	3	2	3	3	3	3	2
SSCAFFOLD00003_8464231	3	3	3	3	3	3	3	2	3	3	3	3	3	3	3	2	3	2	3	3	2
SSCAFFOLD00003_8464285	3	3	3	3	3	3	3	3	3	3	3	3	3	3	3	3	3	2	3	3	2
SSCAFFOLD00003_8464341	3	3	3	3	3	3	3	2	3	3	3	3	3	3	3	2	3	2	3	3	2
SSCAFFOLD00003_8464349	3	3	3	3	3	3	3	3	3	3	3	3	3	3	3	3	3	3	3	3	3
SSCAFFOLD00003_8464372	3	3	3	3	3	3	3	3	3	3	3	3	3	3	3	3	3	2	3	3	2
SSCAFFOLD00003_8464375	3	2	3	3	3	3	3	2	3	2	3	2	3	2	3	3	3	2	3	3	2
SSCAFFOLD00003_8464405	3	3	3	3	3	3	3	3	3	3	3	3	3	3	3	2	3	3	3	3	2
SSCAFFOLD00003_8464424	3	3	3	3	3	2	3	2	3	2	3	2	3	3	3	2	3	3	3	2	2
SSCAFFOLD00003_8498133	3	3	3	3	3	3	3	3	3	3	3	3	3	3	3	3	3	3	3	3	3
SSCAFFOLD00003_8627598	3	2	3	3	3	3	3	3	3	3	3	3	3	3	3	3	3	3	3	3	2
SSCAFFOLD00003_8629554	3	3	3	3	3	3	3	3	3	3	3	3	3	3	3	3	3	3	3	3	3
SSCAFFOLD00003_8653422	3	3	3	3	3	3	3	3	3	2	3	2	3	3	3	3	3	2	3	3	2
SSCAFFOLD00003_8653468	3	3	3	3	3	3	3	3	3	3	3	2	3	2	3	2	3	3	3	3	2
SSCAFFOLD00003_8665353	3	3	3	3	3	3	3	3	3	3	3	2	3	2	3	2	3	3	3	3	2
SSCAFFOLD00003_8674222	3	3	3	3	3	3	3	3	3	3	3	3	3	3	3	3	3	3	3	2	2
SSCAFFOLD00003_8674230	3	3	3	3	3	3	3	3	3	3	3	3	3	3	3	3	3	3	3	3	3
SSCAFFOLD00003_8674232	3	3	3	3	3	3	3	3	3	3	3	3	3	3	3	3	3	3	3	2	2
SSCAFFOLD00003_8674241	3	3	3	3	3	2	3	3	3	3	3	3	3	2	3	2	3	3	3	3	2
SSCAFFOLD00003_8693890	3	2	3	2	2	3	2	3	3	2	3	2	3	2	3	2	3	2	3	2	2
SSCAFFOLD00003_8700674	3	3	3	3	3	3	3	3	3	3	3	3	3	3	3	3	3	3	3	3	3
SSCAFFOLD00003_8708870	3	2	2	3	3	2	3	2	2	3	3	2	3	2	3	2	3	2	2	3	2
SSCAFFOLD00003_8733558	3	2	3	2	3	2	3	2	3	2	3	2	3	2	3	2	2	3	3	2	2
SSCAFFOLD00003_8770718	3	3	3	3	3	3	3	3	3	3	3	3	3	3	3	3	3	3	3	3	3
SSCAFFOLD00003_8770724	3	2	3	2	3	3	3	2	3	3	3	2	3	2	3	2	3	2	3	2	2
SSCAFFOLD00003_8770806	3	3	3	3	3	3	3	3	3	3	3	3	3	3	3	3	3	3	3	3	3
SSCAFFOLD00003_8770823	3	2	3	3	3	3	3	2	3	2	3	3	3	3	3	3	3	3	3	3	2
SSCAFFOLD00003_8775728	3	2	3	2	3	2	3	2	3	2	2	3	3	2	3	2	3	2	3	2	2
SSCAFFOLD00003_8775744	2	3	2	3	3	2	2	3	2	3	3	2	3	2	2	3	2	3	3	2	2
SSCAFFOLD00003_8775750	3	2	3	2	3	3	3	2	3	2	3	3	3	2	3	2	3	3	3	3	2
SSCAFFOLD00003_8775755	3	3	3	3	3	3	3	3	3	3	3	2	3	3	3	3	3	3	3	3	2
SSCAFFOLD00003_8834458	3	3	3	3	3	3	3	3	3	3	3	3	3	3	3	3	3	3	3	3	3
SSCAFFOLD00003_8834464	2	2	2	2	2	2	2	2	2	2	2	2	2	2	2	2	2	2	2	2	2
SSCAFFOLD00004_69206	3	3	3	3	3	3	3	3	3	3	3	3	3	3	3	3	3	3	3	3	3
SSCAFFOLD00004_69225	3	3	3	3	3	3	3	2	3	2	3	3	3	3	3	3	3	3	3	3	2
SSCAFFOLD00004_88625	3	3	3	3	3	3	3	3	3	3	3	3	3	3	3	3	3	3	3	3	3
SSCAFFOLD00004_88648	3	3	3	3	3	3	3	3	3	3	3	3	3	3	3	2	3	3	3	3	2
SSCAFFOLD00004_88681	3	3	3	3	3	3	3	3	3	3	3	2	3	2	3	2	3	3	3	3	2
SSCAFFOLD00004_88709	3	3	3	3	3	3	3	3	3	3	3	3	3	3	3	3	3	3	3	3	3
SSCAFFOLD00004_88722	3	3	3	3	3	3	3	3	3	3	3	3	3	3	3	2	3	3	3	2	2
SSCAFFOLD00004_88723	3	3	3	3	3	3	3	3	3	3	3	2	3	3	3	3	3	3	3	2	2
SSCAFFOLD00004_88729	3	2	3	2	2	3	2	3	3	2	2	3	3	2	2	3	3	2	3	2	2
SSCAFFOLD00004_119674	3	3	3	3	3	3	3	2	3	3	3	3	3	3	3	3	3	3	3	3	2
SSCAFFOLD00004_119683	3	2	3	3	3	3	3	3	3	2	3	2	3	3	3	2	3	2	3	3	2
SSCAFFOLD00004_220504	2	2	2	2	2	2	2	2	2	2	2	2	2	2	2	2	2	2	2	2	2
SSCAFFOLD00004_220517	2	2	2	2	2	2	2	2	2	2	2	2	2	2	2	2	2	2	2	2	2
SSCAFFOLD00004_220708	2	2	2	2	2	2	2	2	2	2	2	2	2	2	2	2	2	2	2	2	2
SSCAFFOLD00004_257998	3	3	3	3	3	3	3	3	3	3	3	3	3	3	3	3	3	3	3	3	3
SSCAFFOLD00004_328429	3	3	3	3	3	3	3	3	3	3	3	3	3	3	3	3	3	3	3	3	3
SSCAFFOLD00004_371330	3	3	3	3	3	3	3	3	3	3	3	3	3	3	3	3	3	3	3	2	2
SSCAFFOLD00004_371382	3	2	2	3	2	3	3	2	2	3	2	3	3	2	3	2	3	2	3	2	2
SSCAFFOLD00004_371391	3	3	3	3	3	2	3	3	3	2	3	3	3	3	3	3	3	3	3	3	2
SSCAFFOLD00004_581047	3	3	3	3	3	3	3	3	3	3	3	3	3	3	3	2	3	3	3	2	2
SSCAFFOLD00004_588043	3	2	3	3	3	3	3	3	3	3	3	3	3	2	3	3	3	3	3	3	2
SSCAFFOLD00004_612243	3	2	3	3	3	3	3	3	2	3	3	3	3	3	3	3	3	2	3	3	2
SSCAFFOLD00004_615395	2	2	2	2	2	2	2	2	2	2	2	2	2	2	2	2	2	2	2	2	2
SSCAFFOLD00004_629189	3	3	3	3	3	3	3	3	3	3	3	3	3	3	3	3	3	3	3	3	3
SSCAFFOLD00004_629242	3	2	3	2	2	3	2	3	3	2	2	3	3	2	3	2	3	2	3	2	2
SSCAFFOLD00004_630933	2	2	2	2	2	2	2	2	2	2	2	2	2	2	2	2	2	2	2	2	2
SSCAFFOLD00004_632656	3	3	3	3	3	3	3	3	3	3	3	3	3	3	3	3	3	3	3	3	3
SSCAFFOLD00004_632869	3	3	3	3	3	2	3	3	3	3	3	3	3	2	3	3	3	3	3	3	2
SSCAFFOLD00004_632957	3	3	3	3	3	3	3	3	3	3	3	3	3	3	3	3	3	3	3	3	3
SSCAFFOLD00004_656892	3	3	3	3	3	3	3	3	3	3	3	3	3	3	3	3	3	3	3	3	3
SSCAFFOLD00004_701997	3	3	3	3	3	3	3	3	3	3	3	3	3	3	3	3	3	3	3	3	3
SSCAFFOLD00004_702804	3	3	3	3	3	3	3	3	3	3	3	3	3	3	3	3	3	3	3	3	3
SSCAFFOLD00004_703210	3	3	3	3	3	3	3	3	3	3	3	3	3	3	3	3	3	3	3	3	3
SSCAFFOLD00004_721432	2	2	2	2	2	2	2	2	2	2	2	2	2	2	2	2	2	2	2	2	2
SSCAFFOLD00004_721483	3	3	3	3	3	3	3	3	3	3	3	3	3	3	3	3	3	3	3	3	3
SSCAFFOLD00004_721549	3	3	3	2	3	2	3	3	2	3	2	3	3	2	3	3	3	3	3	2	2
SSCAFFOLD00004_741524	3	3	3	3	3	3	3	3	3	3	3	3	3	3	3	3	3	3	3	3	3
SSCAFFOLD00004_743368	3	3	3	3	3	3	3	3	3	3	3	3	3	3	3	3	3	3	3	3	3
SSCAFFOLD00004_750315	3	2	3	2	3	2	3	2	3	3	3	2	3	2	3	3	3	2	3	2	2
SSCAFFOLD00004_788361	3	3	3	3	3	3	3	3	3	3	3	3	3	3	3	3	3	2	3	3	2
SSCAFFOLD00004_791558	3	3	3	3	3	3	3	3	3	3	3	3	3	3	3	3	3	3	3	3	3
SSCAFFOLD00004_791563	2	2	2	2	2	2	2	2	2	2	2	2	2	2	2	2	2	2	2	2	2
SSCAFFOLD00004_791764	3	3	3	3	3	2	3	3	3	3	3	3	3	3	3	3	3	3	3	3	2
SSCAFFOLD00004_791774	2	2	2	2	2	2	2	2	2	2	2	2	2	2	2	2	2	2	2	2	2
SSCAFFOLD00004_791801	2	2	2	2	2	2	2	2	2	2	2	2	2	2	2	2	2	2	2	2	2
SSCAFFOLD00004_797069	3	3	3	2	3	3	3	3	3	3	3	3	3	3	3	2	3	3	3	3	2
SSCAFFOLD00004_797083	3	3	3	3	3	3	3	3	3	3	3	3	3	3	3	3	3	3	3	3	3
SSCAFFOLD00004_835168	2	2	2	2	2	2	2	2	2	2	2	2	2	2	2	2	2	2	2	2	2
SSCAFFOLD00004_854621	3	3	3	3	3	3	3	3	3	3	3	3	3	3	3	3	3	3	3	3	3
SSCAFFOLD00004_854627	3	3	3	3	3	3	3	3	3	3	3	3	3	3	3	3	3	3	3	3	3
SSCAFFOLD00004_854976	3	3	3	3	3	3	3	3	3	3	3	3	3	3	3	3	3	3	3	3	3
SSCAFFOLD00004_855745	3	3	3	3	3	3	3	3	3	3	3	3	3	3	3	3	3	3	3	3	3
SSCAFFOLD00004_855764	3	3	3	3	3	3	3	2	3	3	3	3	3	3	3	3	3	3	3	3	2
SSCAFFOLD00004_860783	3	3	3	3	3	3	3	3	3	3	3	3	3	3	3	3	3	3	3	3	3
SSCAFFOLD00004_860791	3	3	3	3	3	3	3	3	3	3	3	3	3	3	3	3	3	3	3	3	3
SSCAFFOLD00004_860802	3	3	3	3	3	3	3	3	3	3	3	3	3	3	3	3	3	3	3	3	3
SSCAFFOLD00004_860890	3	3	3	3	3	2	3	3	3	2	3	2	3	3	3	2	3	2	3	3	2
SSCAFFOLD00004_860896	3	3	3	3	3	3	3	3	3	3	3	3	3	3	3	3	3	2	3	3	2
SSCAFFOLD00004_864402	3	3	3	3	3	3	3	3	3	3	3	3	3	3	3	3	3	3	3	3	3
SSCAFFOLD00004_864408	3	2	3	3	3	2	3	3	3	2	2	3	3	3	2	3	3	3	3	2	2
SSCAFFOLD00004_871057	2	2	2	2	2	2	2	2	2	2	2	2	2	2	2	2	2	2	2	2	2
SSCAFFOLD00004_948347	3	3	3	2	3	3	3	3	3	2	3	2	3	3	3	2	3	2	2	3	2
SSCAFFOLD00004_948458	3	2	3	2	2	3	3	2	3	2	3	2	3	2	3	2	3	2	2	3	2
SSCAFFOLD00004_954571	3	3	3	2	3	2	3	3	3	3	3	2	3	2	3	2	3	3	3	2	2
SSCAFFOLD00004_954631	3	3	3	3	3	3	3	3	3	3	3	3	3	3	3	3	3	3	3	2	2
SSCAFFOLD00004_955272	3	3	3	3	3	3	3	2	3	3	3	2	3	3	3	2	3	3	3	2	2
SSCAFFOLD00004_955275	3	3	3	3	3	3	3	3	3	3	3	3	3	3	3	3	3	3	3	3	3
SSCAFFOLD00004_1050902	2	2	2	2	2	2	2	2	2	2	2	2	2	2	2	2	2	2	2	2	2
SSCAFFOLD00004_1050926	3	3	3	3	3	2	3	3	3	2	3	3	3	3	3	3	3	3	3	3	2
SSCAFFOLD00004_1060421	3	3	3	3	3	3	3	3	3	3	3	3	3	2	3	3	3	3	3	3	2
SSCAFFOLD00004_1060426	3	3	3	3	3	3	3	3	3	3	3	3	3	3	3	3	3	3	3	2	2
SSCAFFOLD00004_1060578	3	3	3	3	3	3	3	3	3	3	3	3	3	2	3	2	3	2	3	3	2
SSCAFFOLD00004_1060600	3	3	3	3	3	3	3	3	3	3	3	3	3	2	3	2	3	2	3	3	2
SSCAFFOLD00004_1060636	3	3	3	3	3	3	3	3	3	3	3	3	3	3	3	3	3	3	3	3	3
SSCAFFOLD00004_1074414	3	3	3	3	3	3	3	3	3	3	3	3	3	3	3	3	3	3	3	3	3
SSCAFFOLD00004_1074492	3	3	3	3	3	3	3	3	3	3	3	3	3	3	3	3	3	3	3	3	3
SSCAFFOLD00004_1114670	3	3	3	3	3	3	3	3	3	3	3	3	3	3	3	3	3	3	3	3	3
SSCAFFOLD00004_1127952	2	2	2	2	2	2	2	2	2	2	2	2	2	2	2	2	2	2	2	2	2
SSCAFFOLD00004_1146741	3	3	3	3	3	3	3	3	3	3	3	3	3	3	3	3	3	3	3	3	3
SSCAFFOLD00004_1160043	3	3	3	3	3	3	3	3	3	3	3	3	3	3	3	2	3	2	3	3	2
SSCAFFOLD00004_1160065	3	3	3	3	3	3	3	3	3	3	3	3	3	3	3	2	3	2	3	3	2
SSCAFFOLD00004_1160071	3	3	3	3	3	3	3	3	3	3	3	3	3	3	3	3	3	3	3	3	3
SSCAFFOLD00004_1165584	3	3	3	3	3	3	3	2	3	3	3	3	3	2	3	3	3	3	3	3	2
SSCAFFOLD00004_1177805	2	2	2	2	2	2	2	2	2	2	2	2	2	2	2	2	2	2	2	2	2
SSCAFFOLD00004_1177816	3	2	3	2	2	3	3	2	3	2	3	2	3	2	3	2	3	2	3	2	2
SSCAFFOLD00004_1190864	3	3	3	3	3	3	3	3	3	3	3	3	3	3	3	3	3	3	3	3	3
SSCAFFOLD00004_1190865	2	2	2	2	2	2	2	2	2	2	2	2	2	2	2	2	2	2	2	2	2
SSCAFFOLD00004_1194346	3	3	3	3	3	3	3	3	3	3	3	3	3	3	3	3	3	3	3	3	3
SSCAFFOLD00004_1194369	3	3	3	3	3	3	3	3	3	3	3	3	3	3	3	3	3	3	3	3	3
SSCAFFOLD00004_1240957	3	2	3	2	3	2	3	3	3	3	3	3	3	3	3	3	3	3	3	3	2
SSCAFFOLD00004_1240964	3	2	3	2	3	2	3	2	3	2	3	3	3	2	3	3	3	2	3	2	2
SSCAFFOLD00004_1240970	3	2	3	2	3	2	3	3	3	3	3	3	3	3	3	3	3	3	3	3	2
SSCAFFOLD00004_1251370	3	3	3	3	3	3	3	3	3	3	3	3	3	3	3	3	3	3	3	2	2
SSCAFFOLD00004_1317386	2	2	2	2	2	2	2	2	2	2	2	2	2	2	2	2	2	2	2	2	2
SSCAFFOLD00004_1365678	3	3	3	3	3	3	3	3	3	3	3	3	3	3	3	3	3	3	3	2	2
SSCAFFOLD00004_1448330	3	3	3	2	3	3	3	3	3	3	3	3	3	3	3	2	3	3	3	2	2
SSCAFFOLD00004_1473656	3	3	3	3	3	3	3	3	3	3	3	3	3	3	3	3	3	3	3	3	3
SSCAFFOLD00004_1473664	3	3	3	3	3	3	3	3	3	3	3	3	3	3	3	3	3	3	3	3	3
SSCAFFOLD00004_1504175	2	2	2	2	2	2	2	2	2	2	2	2	2	2	2	2	2	2	2	2	2
SSCAFFOLD00004_1511876	3	2	2	3	3	2	3	2	3	2	2	3	3	2	2	3	2	3	2	3	2
[truncated: 16,039 more rows]
