# Supplementary material for: Comparing modeling methods of genomic prediction for growth traits of a tropical timber species, Shorea macrophylla
Source: Front Plant Sci. 2023 Oct 31;14:1241908. doi: 10.3389/fpls.2023.1241908 (PMC10644202; doi:10.3389/fpls.2023.1241908)
Supplement: Supplementary file 7 [file Table_5.xlsx]

## Sheet: Sheet1
Table S5. Rate of common SNP markers between two training populations derived from lower p-value of the second GWAS for D7
48 SNP markers: Average 0.23
Training population	0	1	2	3	4	5	6	7	8
1	0.229167
2	0.166667	0.1875
3	0.333333	0.208333	0.166667
4	0.229167	0.166667	0.229167	0.3125
5	0.229167	0.270833	0.1875	0.3125	0.1875
6	0.208333	0.270833	0.229167	0.25	0.3125	0.229167
7	0.291667	0.291667	0.229167	0.270833	0.25	0.333333	0.208333
8	0.208333	0.208333	0.1875	0.270833	0.270833	0.208333	0.270833	0.229167
9	0.1875	0.229167	0.145833	0.25	0.1875	0.229167	0.270833	0.145833	0.270833
96 SNP markers: Average 0.26
Training population	0	1	2	3	4	5	6	7	8
1	0.333333
2	0.25	0.270833
3	0.375	0.291667	0.229167
4	0.260417	0.197917	0.28125	0.322917
5	0.28125	0.21875	0.21875	0.333333	0.260417
6	0.260417	0.25	0.21875	0.28125	0.25	0.229167
7	0.3125	0.270833	0.270833	0.28125	0.28125	0.322917	0.291667
8	0.21875	0.1875	0.229167	0.239583	0.21875	0.125	0.260417	0.21875
9	0.260417	0.28125	0.166667	0.25	0.21875	0.229167	0.28125	0.229167	0.229167
192 SNP markers: Average 0.29
Training population	0	1	2	3	4	5	6	7	8
1	0.322917
2	0.302083	0.34375
3	0.354167	0.28125	0.265625
4	0.265625	0.244792	0.244792	0.291667
5	0.260417	0.286458	0.296875	0.354167	0.265625
6	0.276042	0.328125	0.291667	0.296875	0.307292	0.276042
7	0.3125	0.3125	0.3125	0.338542	0.307292	0.375	0.333333
8	0.223958	0.223958	0.25	0.21875	0.244792	0.135417	0.375	0.270833
9	0.260417	0.307292	0.239583	0.291667	0.291667	0.3125	0.317708	0.265625	0.244792
