# Supplementary material for: Comparing modeling methods of genomic prediction for growth traits of a tropical timber species, Shorea macrophylla
Source: Front Plant Sci. 2023 Oct 31;14:1241908. doi: 10.3389/fpls.2023.1241908 (PMC10644202; doi:10.3389/fpls.2023.1241908)
Supplement: Supplementary file 8 [file Table_6.xlsx]

## Sheet: Sheet1
Table S6. Rate of common SNP markers between two training populations derived from lower p-value of the second GWAS for H7
48 SNP markers: Average 0.25
Training population	0	1	2	3	4	5	6	7	8
1	0.25
2	0.291667	0.229167
3	0.3125	0.25	0.25
4	0.1875	0.229167	0.145833	0.166667
5	0.270833	0.208333	0.229167	0.333333	0.125
6	0.145833	0.333333	0.166667	0.270833	0.229167	0.25
7	0.291667	0.229167	0.333333	0.270833	0.208333	0.25	0.25
8	0.229167	0.25	0.333333	0.208333	0.125	0.229167	0.229167	0.3125
9	0.25	0.395833	0.333333	0.208333	0.291667	0.229167	0.25	0.375	0.333333
96 SNP markers: Average 0.26
Training population	0	1	2	3	4	5	6	7	8
1	0.1875
2	0.28125	0.260417
3	0.229167	0.229167	0.270833
4	0.166667	0.1875	0.177083	0.21875
5	0.21875	0.197917	0.229167	0.322917	0.177083
6	0.1875	0.3125	0.208333	0.28125	0.270833	0.28125
7	0.239583	0.239583	0.364583	0.364583	0.291667	0.302083	0.34375
8	0.260417	0.21875	0.322917	0.239583	0.229167	0.28125	0.333333	0.375
9	0.197917	0.322917	0.3125	0.302083	0.291667	0.260417	0.270833	0.333333	0.322917
192 markers: Average 0.28
Training population	0	1	2	3	4	5	6	7	8
1	0.234375
2	0.260417	0.255208
3	0.239583	0.239583	0.333333
4	0.161458	0.192708	0.244792	0.244792
5	0.213542	0.260417	0.28125	0.328125	0.197917
6	0.203125	0.322917	0.239583	0.286458	0.276042	0.302083
7	0.234375	0.265625	0.354167	0.369792	0.307292	0.307292	0.338542
8	0.213542	0.255208	0.302083	0.276042	0.28125	0.302083	0.328125	0.364583
9	0.197917	0.317708	0.296875	0.34375	0.322917	0.333333	0.34375	0.364583	0.338542
