# Supplementary material for: Comparing modeling methods of genomic prediction for growth traits of a tropical timber species, Shorea macrophylla
Source: Front Plant Sci. 2023 Oct 31;14:1241908. doi: 10.3389/fpls.2023.1241908 (PMC10644202; doi:10.3389/fpls.2023.1241908)
Supplement: Supplementary file 9 [file Table_7.xlsx]

## Sheet: correlation_coefficient_v2_medi
Table S7. Standard deviations of the predictive abilities derived from 10 permutations of each of 10 training populations (100 permutations in total)
Trait	Numbers of SNPs	GBLUP	BayesA	BayesB	BayesC	BRR	BL	RKHS	RF	XGB	LGB	CNN1D	CNN2D
D7	48	0.0782566	0.0783791	0.076052	0.0767929	0.0793074	0.0770643	0.08535	0.0637007	0.0682274	0.0780201	0.0740964	0.0803621
D7	96	0.10345	0.0962328	0.0905478	0.0928344	0.0997364	0.0932636	0.106343	0.0867685	0.0948164	0.0851998	0.118142	0.101071
D7	192	0.10457	0.106113	0.103682	0.105081	0.10763	0.103851	0.105963	0.0694663	0.0766761	0.0703819	0.112773	0.0908529
D7	18037	0.0877129	0.0895934	0.0905761	0.0911951	0.0911965	0.0850064	0.0914004	0.0738647	0.10464	0.106006	-	-
H7	48	0.0938955	0.0914799	0.0944051	0.0945262	0.0906475	0.0930109	0.102353	0.0639826	0.0734738	0.0874063	0.0927138	0.0752115
H7	96	0.121681	0.121223	0.120595	0.121646	0.121496	0.119452	0.107608	0.0756238	0.0803819	0.0964191	0.0903141	0.0933771
H7	192	0.123005	0.116529	0.118907	0.118806	0.113804	0.116095	0.107273	0.0788259	0.0805928	0.0955821	0.0862449	0.0798035
H7	18037	0.0612826	0.0810915	0.0818172	0.0823256	0.08419	0.0782686	0.0790417	0.0687984	0.103992	0.103913	-	-
